# Supplementary material for: Neurokinin-1 antagonist orvepitant for EGFRI-induced pruritus in patients with cancer: a randomised, placebo-controlled phase II trial
Source: PubMed Central journal article supplement — BMJ Open. 2020 Feb 6;10(2):e030114. doi: 10.1136/bmjopen-2019-030114 (PMC7045265; doi:10.1136/bmjopen-2019-030114), 2020-02-06
Supplement: bmjopen-2019-030114.draft_revisions.pdf [file bmjopen-2019-030114.draft_revisions.pdf]

# BMJ Open

BMJ Open is committed to open peer review. As part of this commitment we make the peer review history of every article we publish publicly available.

When an article is published we post the peer reviewers' comments and the authors' responses online. We also post the versions of the paper that were used during peer review. These are the versions that the peer review comments apply to.

The versions of the paper that follow are the versions that were submitted during the peer review process. They are not the versions of record or the final published versions. They should not be cited or distributed as the published version of this manuscript.

BMJ Open is an open access journal and the full, final, typeset and author-corrected version of record of the manuscript is available on our site with no access controls, subscription charges or pay-per-view fees (<http://bmjopen.bmj.com>).

If you have any questions on BMJ Open's open peer review process please email [info.bmjopen@bmj.com](mailto:info.bmjopen@bmj.com)

# BMJ Open

## The neurokinin-1 antagonist orvepitant for EGFR-induced pruritus in cancer patients: a randomised, placebo-controlled, phase II trial

|                               |                                                                                                                                                                                                                                                                                                                                                                                                                                                                                                                                                                                                                    |
|-------------------------------|--------------------------------------------------------------------------------------------------------------------------------------------------------------------------------------------------------------------------------------------------------------------------------------------------------------------------------------------------------------------------------------------------------------------------------------------------------------------------------------------------------------------------------------------------------------------------------------------------------------------|
| Journal:                      | <i>BMJ Open</i>                                                                                                                                                                                                                                                                                                                                                                                                                                                                                                                                                                                                    |
| Manuscript ID                 | bmjopen-2019-030114                                                                                                                                                                                                                                                                                                                                                                                                                                                                                                                                                                                                |
| Article Type:                 | Original research                                                                                                                                                                                                                                                                                                                                                                                                                                                                                                                                                                                                  |
| Date Submitted by the Author: | 01-Mar-2019                                                                                                                                                                                                                                                                                                                                                                                                                                                                                                                                                                                                        |
| Complete List of Authors:     | Vincenzi, Bruno; Universita Campus Bio-Medico di Roma Facolta di Medicina e Chirurgia,<br>Trower, Mike; NeRRe Therapeutics Ltd<br>Duggal, Ajay; Adnovate Clinical Development Strategies Ltd<br>Guglielmini, Pamela; A.S.O. S.S. Antonio e Biagio e C. Arrigo<br>Harris, Peter; NeRRe Therapeutics Ltd<br>Jackson, David; Cromsource<br>Lacouture, Mario E.; Mem Sloan Kettering Canc Ctr<br>Ratti, Emiliangelo; Takeda Pharmaceuticals Company<br>Tonini, Giuseppe; Università Campus Bio-Medico di Roma, Medical Oncology<br>Wood, Andrew; Idfac Ltd<br>Ständer, Sonja; University Hospital Münster, Dermatology |
| Keywords:                     | EGFR Inhibitor, neurokinin-1 antagonist, orvepitant, pruritus                                                                                                                                                                                                                                                                                                                                                                                                                                                                                                                                                      |
|                               |                                                                                                                                                                                                                                                                                                                                                                                                                                                                                                                                                                                                                    |

SCHOLARONE™  
Manuscripts

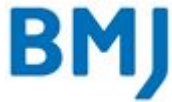

I, the Submitting Author has the right to grant and does grant on behalf of all authors of the Work (as defined in the below author licence), an exclusive licence and/or a non-exclusive licence for contributions from authors who are: i) UK Crown employees; ii) where BMJ has agreed a CC-BY licence shall apply, and/or iii) in accordance with the terms applicable for US Federal Government officers or employees acting as part of their official duties; on a worldwide, perpetual, irrevocable, royalty-free basis to BMJ Publishing Group Ltd ("BMJ") its licensees and where the relevant Journal is co-owned by BMJ to the co-owners of the Journal, to publish the Work in this journal and any other BMJ products and to exploit all rights, as set out in our [licence](#).

The Submitting Author accepts and understands that any supply made under these terms is made by BMJ to the Submitting Author unless you are acting as an employee on behalf of your employer or a postgraduate student of an affiliated institution which is paying any applicable article publishing charge ("APC") for Open Access articles. Where the Submitting Author wishes to make the Work available on an Open Access basis (and intends to pay the relevant APC), the terms of reuse of such Open Access shall be governed by a Creative Commons licence – details of these licences and which [Creative Commons](#) licence will apply to this Work are set out in our licence referred to above.

Other than as permitted in any relevant BMJ Author's Self Archiving Policies, I confirm this Work has not been accepted for publication elsewhere, is not being considered for publication elsewhere and does not duplicate material already published. I confirm all authors consent to publication of this Work and authorise the granting of this licence.

**TITLE:** The neurokinin-1 antagonist orvepitant for EGFR-induced pruritus in cancer patients: a randomised, placebo-controlled, phase II trial

**AUTHORS:** Bruno Vincenzi<sup>1\*</sup> (0000-0001-8222-9025), Mike Trower<sup>2\*</sup> (0000-0003-0412-5719), Ajay Duggal<sup>3</sup> (0000-0003-3294-616X), Pamela Guglielmini<sup>4</sup> (0000-0003-3612-7786), Peter Harris<sup>2</sup> (0000-0002-8374-3859), David Jackson<sup>5</sup> (0000-0002-4448-8648), Mario Lacouture<sup>6</sup> (0000-0002-4818-3710), Emiliangelo Ratti<sup>7\*\*</sup> (0000-0002-7352-4695), Giuseppe Tonini<sup>1</sup> (0000-0003-4442-8677), Andrew Wood<sup>8</sup> (0000-0001-7536-6398), Sonja Ständer<sup>9</sup> (0000-0003-3612-7786)

**AFFILIATIONS:**

<sup>1</sup>Medical Oncology, Università Campus Bio-Medico di Roma, Rome, Italy

<sup>2</sup>NeRRe Therapeutics Ltd, Stevenage, UK

<sup>3</sup>Adnovate Clinical Development Strategies Ltd, East Sussex, UK

<sup>4</sup>A.S.O. S.S. Antonio e Biagio e C. Arrigo, Alessandria, Italy

<sup>5</sup>Cromsource, Stirling, UK

<sup>6</sup>Memorial Sloan Kettering Cancer Center, New York, US

<sup>7</sup>Takeda Pharmaceuticals Company, Boston, US

<sup>8</sup>Idfac Ltd, Devon, UK

<sup>9</sup>Center for Chronic Pruritus, University Hospital Münster, Münster, Germany

\*Dr Vincenzi and Dr Trower contributed equally to this work.

\*\*Current affiliation for E. Ratti

**CORRESPONDING AUTHOR:** Mike Trower, PhD

**Address:** NeRRe Therapeutics Ltd, Stevenage Bioscience Catalyst, Stevenage, UK

**Phone:** +44 1438 906960

**Email:** mike.trower@nerretherapeutics.com

**WORD COUNT:** 2933 words

## ABSTRACT

**Objective** To evaluate the efficacy of orvepitant (10 or 30 mg given once daily, orally for 4 weeks), a neurokinin-1 antagonist, compared with placebo in reducing the intensity of epidermal growth factor receptor inhibitor (EGFRI)-induced intense pruritus

**Design** Randomised, double-blind, placebo-controlled clinical trial

**Setting** 15 hospitals in Italy and 5 hospitals in the United Kingdom

**Participants** 44 patients aged  $\geq 18$  years receiving an EGFRI for a histologically confirmed malignant solid tumour and experiencing moderate or intense pruritus after EGFRI treatment

**Intervention** 30 mg or 10 mg orvepitant or placebo tablets once daily for 4 weeks (randomised 1:1:1)

**Primary and secondary outcome measures** Numerical rating scale (NRS) from 0 (no itch) to 10 (worst itch imaginable) daily between Baseline and Week 8; NRS, verbal rating scale, Skindex-16, and Leeds Sleep Evaluation Questionnaire at each study visit (Baseline, Week 1, Week 4, Week 8); assessment and grading of EGFRI-induced rash at Baseline, Week 4, Week 8

**Results** Mean NRS change from Baseline to Week 4 was -2.78 (SD: 2.64) points in the 30 mg group, -3.04 (SD: 3.06) points in the 10 mg group, and -3.21 (SD: 1.77) points in the placebo group; the difference between orvepitant and placebo was not statistically significant. The trial was terminated early because of recruitment challenges; only 44 of the planned 90 patients were randomised. All patients were analysed for efficacy and safety. No safety signal was detected. Adverse events related to orvepitant (asthenia, dizziness, dry mouth, hyperhidrosis) were all of mild or moderate severity.

**Conclusions** Orvepitant was safe and well tolerated. No difference in NRS score between the orvepitant and placebo groups was observed at Week 4. Other than a true lack of efficacy, potential explanations for this finding include early termination, placebo effect, or natural progression of the condition.

**Trial registration number** EudraCT 2013-002763-25

**KEY WORDS:** pruritus, EGFR inhibitor, neurokinin-1 antagonist, orvepitant

## STRENGTHS AND LIMITATIONS OF THIS STUDY

- ▶ The RELIEVE 1 study was the first randomised, double-blind, placebo-controlled study of a neurokinin-1 antagonist for EGFRI-induced pruritus.
- ▶ The RELIEVE 1 study provided insights into the course and itch characteristics of EGFRI-induced pruritus.
- ▶ The critically ill patients treated in this study may have had particularly high expectations for a benefit from the treatment, which may have contributed to response in both placebo and active groups.
- ▶ The enrolment target was not reached because of recruitment problems in the critically ill target population.

## INTRODUCTION

While targeted biological therapies have increased patient survival for several tumour types, they have been associated with a variety of adverse events (AEs), particularly dermatological AEs including pruritus. In a 2013 systematic review and meta-analysis of pruritus with targeted cancer therapies, the incidences of all-grade and high-grade pruritus were 17.4% and 1.4%, respectively, and the relative risk of all-grade pruritus was 2.90.<sup>1</sup> A 2015 systematic review and meta-analysis reported that panitumumab and gefitinib showed the highest incidences of all-grade pruritus (56.8% and 49.4%, respectively) and sunitinib and erlotinib the lowest (5.8% and 3.6%, respectively). The relative risk of development for all-grade pruritus in this study was 2.2 and for high-grade pruritus 2.6. Anti-epidermal growth factor receptor inhibitor (EGFRI) monoclonal antibodies (mAbs) had the highest relative risk of all-grade pruritus of 2.84 compared to EGFR/HER2 tyrosine kinase inhibitors and 1.24 compared to immunotherapy.<sup>2</sup> Both reports emphasise the importance of pruritus management in cancer patients and advise patient education and counselling, frequent clinical monitoring, and timely treatment to prevent more significant outcomes such as excoriations or infections and to optimise targeted therapy dosing.

EGFRIs have specifically been associated with a number of dermatological AEs (including acneiform rash, hair changes, mucositis, xerosis/fissures, and paronychia as well as pruritus) that can require dose modification or treatment interruptions and thus interfere with these potentially life-prolonging therapies.<sup>3-7</sup> Rash, xerosis, and pruritus have the greatest impact on patient quality of life.<sup>7-9</sup> Pruritus incidence reported in clinical trials of anti-EGFR mAbs and small-molecule EGFRIs varies from 10% to 16% for cetuximab, 57% to 69% for panitumumab, 9% to 13% for erlotinib, 8% to 9% for gefitinib, 28% to 45% for lapatinib, and 14% for osimertinib.<sup>10-11</sup> EGFRI-induced pruritus may be underreported or incompletely reported in clinical studies.<sup>12</sup> In a survey of 379 cancer survivors (112 on targeted therapies), 36% experienced pruritus during treatment, and of the 122 patients whose quality of life was diminished by a treatment side effect, 44% attributed this effect to pruritus.<sup>13</sup> Lacouture et al. reported that pruritus occurs in approximately half of all patients treated with EGFRIs.<sup>6</sup> Finally, in a review of interviews conducted with 100 patients taking mainly EGFR mAbs, 72% of patients reported experiencing pruritus.<sup>14</sup>

Neurokinin-1 (NK1) receptor antagonists are a promising therapy for acute and chronic EGFRI-induced pruritus.<sup>15</sup> Gerber et al. reported that mast cells significantly accumulate in the lesional skin of patients treated with EGFRIs and suggested that the antipruritic activity of the NK1 receptor antagonist aprepitant is achieved by blocking the activation of mast-cell NK1 receptors by its cognate ligand substance P, thereby preventing the release of mast cell histamine and other proinflammatory/pruritogenic mediators.<sup>16-18</sup> Aprepitant (Emend®) is the first commercially available drug of a new class of NK1 receptor antagonists for the prevention of chemotherapy-induced and postoperative nausea and vomiting. It has been evaluated in numerous open-label clinical studies of patients suffering from treatment-refractory pruritus, including a large number of patients suffering with acute EGFRI-induced pruritus.<sup>19-33</sup> Aprepitant is a rapid and highly effective antipruritic medication that significantly improves patients' quality of life. The 2015 systematic review and meta-analysis advocated the testing of aprepitant and other emerging NK1 receptor antagonists in patients receiving agents with a high risk of pruritus.<sup>2</sup> Orvepitant, a potent and selective NK1 antagonist that blocks substance P activity, has a similar mechanism of action to aprepitant and thus may be expected to achieve similar antipruritic efficacy in patients suffering from intense itch. The RELIEVE 1 study was the first randomised, double-blind, placebo-controlled study of an NK1 antagonist for EGFRI-induced pruritus.

## METHODS

### Study design and enrolment

The primary objective of this Phase 2, multicentre, randomised, double-blind, placebo-controlled clinical trial was to evaluate the efficacy of orvepitant compared with placebo in reducing the intensity of intense EGFRI-induced

pruritus. Pruritus intensity was measured primarily by change from Baseline in patient-recorded numerical rating scale (NRS) score ranging from 0 (no itch) to 10 (worst itch imaginable) points. On the basis of an assumed between-patient standard deviation (SD) of 2 points,<sup>10</sup> 23 patients per treatment arm were required to provide 80% power for a 2-sided 5% significance level hypothesis test to achieve a significant result when the true difference is at least 2 points. It was thus planned to enrol 30 patients per arm (90 total). After 20 months of recruitment, this target was far from being reached, and a blinded analysis of data variance indicated that it was highly unlikely that a statistically robust assessment of benefit could be made even if enrolment were completed. The sponsor decided to terminate enrolment. However, the study data for all enrolled patients were analysed.

### Patients and treatments

Patients were enrolled at 15 hospitals in Italy and 5 hospitals in the United Kingdom between 13 November 2013 and 11 May 2015. Key eligibility criteria were age 18 years and older, monotherapy with an EGFR inhibitor (including cetuximab, panitumumab, erlotinib, gefitinib, lapatinib, and afatinib) for a histologically confirmed malignant solid tumour, moderate or intense pruritus after treatment with the EGFR inhibitor (defined as the mean of between 2 and 7 daily patient-reported average pruritus intensity NRS scores initially  $\geq 7$  and subsequently changed in April 2014 to  $\geq 5$  to improve study recruitment), pruritus treatment within the previous 3 months, and no use of aprepitant or fosaprepitant in the previous 4 weeks. The investigators randomised eligible patients according to a central randomisation code generated by the sponsor using an interactive voice response system (IVRS). The patients were assigned in a 1:1:1 ratio to receive 30 mg orvepitant, 10 mg orvepitant, or placebo tablets once daily (in the evening before bedtime) for 4 weeks. Randomisation was stratified by investigational site; block size was 6. Placebo tablets were identical in appearance to orvepitant tablets.

### Assessments

Patients were followed-up for 4 weeks after treatment was completed or discontinued. Patients reported their NRS score daily using an IVRS between Baseline and Week 8, and at each study visit (Baseline, Week 1, Week 4, Week 8) they completed a study visit NRS and a verbal rating scale (VRS) (validated instruments for the measurement of pruritus intensity),<sup>34</sup> the Skindex-16 (an instrument to measure the effects of skin disease on health-related quality of life),<sup>35</sup> and the Leeds Sleep Evaluation Questionnaire (LSEQ; a 10-item instrument to assess changes in sleep quality over the course of an intervention). EGFR inhibitor-induced rash was assessed and graded at Baseline, Week 4, and Week 8. Safety was assessed by physical examination (including Eastern Cooperative Oncology Group [ECOG] status) and 12-lead electrocardiogram (ECG) at Baseline and Week 8, vital signs and laboratory tests (haematology, serum biochemistry, urinalysis) at each visit, and recording of AEs throughout the study. AEs were graded and categorised according to the National Cancer Institute's Common Terminology Criteria for Adverse Events (CTCAE). Use of concomitant medications, including EGFR inhibitors and any rescue medication, was recorded throughout the study.

### Endpoints

The primary endpoint was change from Baseline in mean patient-recorded NRS score (over the last 3 recordings) at Week 4. Secondary endpoints were also evaluated: change from Baseline in mean patient-recorded NRS score (last 3 recordings) at Weeks 1, 4, 8; change from Baseline in mean patient-recorded NRS score (all week) at Weeks 1, 4, 8; change from Baseline in clinic visit NRS score at Weeks 1, 4, 8; change from Week 4 in patient-recorded NRS score at Weeks 5, 6, 7, 8; change from Baseline in clinic visit VRS score at Weeks 1, 4, 8; change from Week 4 in clinic visit VRS score at Week 8; change from Baseline in pruritus intensity (from patient-recorded NRS) at Days 2, 3, 4, 5, 6, 7, 8; change from Baseline in Skindex-16 at Weeks 1, 4, 8; change from Baseline in LSEQ at Weeks 1, 4, 8; rescue medication use; EGFR inhibitor dose reduction; and study withdrawal because of intense uncontrolled pruritus.

## Statistical analysis

Efficacy endpoints were analysed in the intention-to-treat (ITT) population of all randomised patients who had received at least the first dose of study medication and had at least 1 post-treatment efficacy assessment. The primary endpoint was analysed by mixed-model repeated measures analysis with the primary inference being the change from Baseline in patient-reported NRS-scores averaged across the last 3 values of the fourth week of dosing fitted as the response variable in the mixed model. Point estimates and corresponding 95% confidence intervals were constructed for the difference between each dose of orvepitant and placebo for each week. Safety was analysed in the safety population of all patients who received a dose of study medication using descriptive statistics.

## Patient and Public Involvement

Patients and public were not involved in the design, conduct and reporting of this clinical research.

## RESULTS

### Patients

A total of 44 patients were randomised and treated: 16 to orvepitant 30 mg, 14 to orvepitant 10 mg, and 14 to placebo. Nine patients discontinued the study (Figure 1). All patients were Caucasian, and 26 (59%) were male and 18 (41%) female. Median age was 68 years (range: 35 to 83 years), and 32 (73%) patients were aged 65 or older. Mean baseline NRS ranged from 5.88 (SD: 0.93) in the placebo group to 6.68 (SD: 1.28) in the 30 mg orvepitant group. At Baseline, most patients had moderate to severe pruritus, and the most common locations were the head (26 [59%] patients) and the trunk (11 [25%]). Baseline assessments of acneiform rash and maculopapular rash showed a similar pattern (Table 1).

**Table 1. Demographic and baseline characteristics**

| Characteristic                                       | Orvepitant 30 mg<br>N = 16 | Orvepitant 10 mg<br>N = 14 | Placebo<br>N = 14 | Total<br>N = 44 |
|------------------------------------------------------|----------------------------|----------------------------|-------------------|-----------------|
| Age (years), median (range)                          | 69.0 (43, 83)              | 73.5 (49, 81)              | 67.0 (35, 76)     | 68.0 (35, 83)   |
| Age groups, n (%)                                    |                            |                            |                   |                 |
| < 65 years                                           | 4 (25.0)                   | 4 (28.6)                   | 4 (28.6)          | 12 (27.3)       |
| ≥ 65 years                                           | 12 (75.0)                  | 10 (71.4)                  | 10 (71.4)         | 32 (72.7)       |
| Gender, n (%)                                        |                            |                            |                   |                 |
| Female                                               | 5 (31.3)                   | 5 (35.7)                   | 8 (57.1)          | 18 (40.9)       |
| Male                                                 | 11 (68.8)                  | 9 (64.3)                   | 6 (42.9)          | 26 (59.1)       |
| Race, n (%)                                          |                            |                            |                   |                 |
| Caucasian                                            | 16 (100.0)                 | 14 (100.0)                 | 14 (100.0)        | 44 (100.0)      |
| Time since cancer diagnosis (months), median (range) | 17.5 (1, 131)              | 29.7 (12, 129)             | 20.8 (5, 60)      | 23.0 (1, 131)   |
| Patient-reported NRS                                 |                            |                            |                   |                 |
| Mean (SD)                                            | 6.68 (1.278)               | 6.95 (1.4.13)              | 5.88 (0.930)      | NC              |
| Median (range)                                       | 6.86 (4.8, 9.3)            | 7.00 (5.0, 10.0)           | 5.57 (5.0, 7.4)   | NC              |
| <b>PRURITUS</b>                                      |                            |                            |                   |                 |
| CTCAE grade, n (%)                                   |                            |                            |                   |                 |



|                                                                                                                                     |          |          |           |           |
|-------------------------------------------------------------------------------------------------------------------------------------|----------|----------|-----------|-----------|
| Grade 1                                                                                                                             | 2 (12.5) | 0        | 0         | 2 (4.5)   |
| Grade 2                                                                                                                             | 8 (50.0) | 9 (64.3) | 11 (78.6) | 28 (63.6) |
| Grade 3                                                                                                                             | 5 (31.3) | 5 (35.7) | 3 (21.4)  | 13 (29.5) |
| Unknown                                                                                                                             | 1 (6.3)  | 0        | 0         | 1 (2.3)   |
| Location, n (%)                                                                                                                     |          |          |           |           |
| Head                                                                                                                                | 8 (50.0) | 6 (42.9) | 12 (85.7) | 26 (59.1) |
| Trunk                                                                                                                               | 7 (43.8) | 3 (21.4) | 1 (7.1)   | 11 (25.0) |
| Arms                                                                                                                                | 0        | 3 (21.4) | 0         | 3 (6.8)   |
| Legs                                                                                                                                | 0        | 2 (14.3) | 1 (7.1)   | 3 (6.8)   |
| Unknown                                                                                                                             | 1 (6.3)  | 0        | 0         | 1 (2.3)   |
| <b>ACNEIFORM RASH</b>                                                                                                               |          |          |           |           |
| CTCAE grade, n (%)                                                                                                                  |          |          |           |           |
| Grade 1                                                                                                                             | 2 (12.5) | 3 (21.4) | 2 (14.3)  | 7 (15.9)  |
| Grade 2                                                                                                                             | 7 (43.8) | 7 (50.0) | 10 (71.4) | 24 (54.5) |
| Grade 3                                                                                                                             | 6 (37.5) | 3 (21.4) | 1 (7.1)   | 10 (22.7) |
| Unknown                                                                                                                             | 1 (6.3)  | 1 (7.1)  | 1 (7.1)   | 3 (6.8)   |
| Location, n (%)                                                                                                                     |          |          |           |           |
| Head                                                                                                                                | 7 (43.8) | 5 (35.7) | 11 (78.6) | 23 (52.3) |
| Trunk                                                                                                                               | 7 (43.8) | 5 (35.7) | 0         | 12 (27.3) |
| Arms                                                                                                                                | 1 (6.3)  | 3 (21.4) | 1 (7.1)   | 5 (11.4)  |
| Legs                                                                                                                                | 0        | 0        | 1 (7.1)   | 1 (2.3)   |
| Unknown                                                                                                                             | 1 (6.3)  | 1 (7.1)  | 1 (7.1)   | 3 (6.8)   |
| <b>MACULOPAPULAR RASH</b>                                                                                                           |          |          |           |           |
| CTCAE grade, n (%)                                                                                                                  |          |          |           |           |
| Grade 1                                                                                                                             | 3 (18.8) | 5 (35.7) | 5 (35.7)  | 13 (29.5) |
| Grade 2                                                                                                                             | 8 (50.0) | 5 (35.7) | 8 (57.1)  | 21 (47.7) |
| Grade 3                                                                                                                             | 4 (25.0) | 3 (21.4) | 0         | 7 (15.9)  |
| Unknown                                                                                                                             | 1 (6.3)  | 1 (7.1)  | 1 (7.1)   | 3 (6.8)   |
| Location, n (%)                                                                                                                     |          |          |           |           |
| Head                                                                                                                                | 7 (43.8) | 5 (35.7) | 12 (85.7) | 24 (54.5) |
| Trunk                                                                                                                               | 7 (43.8) | 4 (28.6) | 0         | 11 (25.0) |
| Arms                                                                                                                                | 1 (6.3)  | 4 (28.6) | 0         | 5 (11.4)  |
| Legs                                                                                                                                | 0        | 0        | 1 (7.1)   | 1 (2.3)   |
| Unknown                                                                                                                             | 1 (6.3)  | 1 (7.1)  | 1 (7.1)   | 3 (6.8)   |
| CTCAE = Common Terminology Criteria for Adverse Events; NC = not calculated; NRS = numerical rating scale; SD = standard deviation. |          |          |           |           |

The median dose number was 28 (range: 1 to 35) in the 30 mg group, 28 (range: 1 to 35) in the 10 mg group, and 29 (range: 28 to 39) in the placebo group. Five (11%) patients (all in the orvepitant groups) took the study drug for 1 week or less; 18 (41%) patients took the study drug (orvepitant or placebo) for 1 to 4 weeks, and 21 (48%) took the study drug for >4 weeks (maximum: 39 days).

All 44 patients were included in the ITT and safety populations and analysed according to the randomised treatment.

## Efficacy

Patient compliance with daily reporting of NRS score was high; mean compliance rate was 92%, and median compliance rate was 100%. At Week 4, 38 subjects remained in the study. NRS score decreased from Baseline to Week 4 in all 3 groups (Table 2).

**Table 2. Change from baseline in patient-reported numerical reporting scale scores at Week 4**

| Statistic                                                                         | Orvepitant 30 mg<br>N = 16 | Orvepitant 10 mg<br>N = 14 | Placebo<br>N = 14    |
|-----------------------------------------------------------------------------------|----------------------------|----------------------------|----------------------|
| n                                                                                 | 13                         | 11                         | 14                   |
| Mean (SD)                                                                         | -2.78 (2.644)              | -3.04 (3.062)              | -3.21 (1.768)        |
| Median                                                                            | -2.75                      | -2.00                      | -2.50                |
| Minimum, maximum                                                                  | -6.3, 3.0                  | -8.3, 1.1                  | -6.3, 0.0            |
| LSMEANS estimate (95% CI)                                                         | -2.40 (-3.54, -1.27)       | -2.53 (-3.80, -1.27)       | -3.70 (-4.88, -2.52) |
| LSMEANS standard error (95% CI)                                                   | 0.560                      | 0.623                      | 0.577                |
| Orvepitant vs placebo difference (95% CI)                                         | 1.30 (-0.35, 2.95)         | 1.17 (-0.62, 2.96)         |                      |
| P value                                                                           | 0.120                      | 0.194                      |                      |
| CI = confidence interval; LSMEANS = least-squares means; SD = standard deviation. |                            |                            |                      |

The difference between orvepitant and placebo was not statistically significant (30 mg group:  $P = 0.12$ , 10 mg group:  $P = 0.19$ ). Secondary NRS and VRS endpoints reflected the results for the primary endpoint (Supplemental Table 1). Change from Baseline in Skindex-16 and LSEQ score showed no difference between the treatment groups at any time point. Seven (15.9%) patients (3 in the orvepitant 30 mg group and 2 each in the orvepitant 10 mg and placebo groups) used rescue medications during the study.

### Safety

No safety signal was detected. A total of 34 (77%) patients experienced a treatment-emergent AE, but no unexpected AEs were noted. The only AEs that occurred in >5% of patients were asthenia (8 [18%] patients), skin toxicity (7 [16%] patients); term reported by the investigators was skin toxicity, which for EGFRIs commonly includes reactions such as skin rash, skin dryness [xerosis], pruritus, paronychia, hair abnormality, mucositis, and increased, growth of the eyelashes or facial hair<sup>36</sup>), diarrhoea (4 [9%] patients), cough (3 [7%] patients), rash (3 [7%] patients); terms as reported by the investigators included worsening of rash; hands, ankle and face rash; and rash cutaneous), and anaemia (3 [7%] patients). Other than anaemia and rash, which occurred only in patients who received orvepitant, these more common AEs occurred in similar rates in the active and placebo groups. There was no apparent relationship between incidence or severity of AEs and orvepitant dose. No serious AEs were reported. Only 4 mild and moderate AEs were considered related to orvepitant (Table 3).

**Table 3. Drug-related adverse events**

|                     | Orvepitant 30 mg<br>N = 16<br>n (%) | Orvepitant 10 mg<br>N = 14<br>n (%) | Placebo<br>N = 14<br>n (%) |
|---------------------|-------------------------------------|-------------------------------------|----------------------------|
| Any drug-related AE | 3 (18.8)                            | 1 (7.1)                             | 0                          |
| Mild AEs            |                                     |                                     |                            |
| Asthenia            | 1 (6.3)                             | 0                                   | 0                          |

|               |         |         |   |
|---------------|---------|---------|---|
| Dizziness     | 0       | 1 (7.1) | 0 |
| Dry mouth     | 1 (6.3) | 0       | 0 |
| Moderate AEs  |         |         |   |
| Hyperhidrosis | 1 (6.3) | 0       | 0 |

No clinically significant changes in laboratory results, vital signs, physical examination findings, ECOG status, or ECG parameters were related to orvepitant.

## DISCUSSION

Orvepitant appeared safe and well tolerated in this study, and the safety profile exhibited allows further investigation of orvepitant in this or other indications.

The efficacy results in this randomized, double-blind, placebo-controlled study were inconclusive. No difference between the active groups and the placebo group was observed. It is important to consider the potential causes for this lack of difference to inform further research in this indication. Other than a true lack of efficacy, this finding may have resulted from the premature termination of the study and the consequent substantially reduced sample size. Another potential explanation is a placebo effect. A placebo effect is often seen with subjective endpoints such as pruritus intensity, and a recent meta-analysis of clinical trials showed that placebo has a substantial effect in in patients suffering from chronic itch.<sup>37</sup> Placebo effects in clinical trials result from the expectation by patients and their physicians of the potential benefit of the investigational drug. In this study, critically ill patients were receiving a modern antineoplastic therapy. It might be true that these patients have a particularly high expectation of the benefit of their EGFR therapy in general and of orvepitant's ability to reduce pruritus and thereby enable prolongation of their EGFR therapy. Thus, it might be very difficult to study a treatment for an expectation-driven symptom in this patient population. The improvement seen in the 2 orvepitant groups and the placebo group may have also been the result of the natural course of this acute pruritus condition, which is not well defined at this time.

Nevertheless, NK1 antagonists still hold potential for treatment of skin toxicities experienced by cancer patients treated with EGFRs or other targeted therapies. In a randomised, placebo-controlled clinical trial of serlopitant in patients with prurigo nodularis, serlopitant reduced itch as reported on a visual analogue scale after 4 and 8 weeks of treatment and was superior to placebo in multiple secondary pruritus endpoints.<sup>38</sup> Further randomised, placebo-controlled trials of NK1 antagonists are needed to evaluate findings in observational studies, but the experience of this trial, recruitment difficulty and improvement in patients' pruritus regardless of treatment assignment, shows that further research in this indication will prove challenging. Recruitment for this study was stopped after 20 months when only 44 of the planned 90 subjects had been enrolled. Despite evidence in the literature of a high prevalence of EGFR-induced pruritus,<sup>1-14,39</sup> we experienced substantial difficulty identifying patients with severe enough pruritus (i.e., NRS score  $\geq 5$ ) to enable detection of post-treatment change. Study enrolment may have been limited by the fact that all investigators were oncologists, who are faced with multiple AEs in patients receiving EGFRs (e.g., diarrhea, rash, asthenia, nausea and vomiting, conjunctivitis, mucositis) that may have taken precedence over pruritus, a purely subjective symptom that is not widely reported in the oncology community.<sup>12</sup> Future studies will require a more complete understanding of the epidemiology and course of target cancer therapy-induced pruritus, a sufficient and appropriate patient population to achieve statistical power, and a design that minimises or quantifies a potential placebo effect.

**Acknowledgements** We thank Anne McDonough, a professional medical writer who provided medical writing support funded by NeRRe Therapeutics Ltd.

**Contributors** Study concept and design: BV, MT, PH, ML, ER, GT, AW, SS; data acquisition: BV, PG; quality control of data and algorithms: PH, DJ; data analysis and interpretation: BV, MT, AD, SS; statistical analysis: DJ; manuscript preparation: MT; manuscript editing: BV, SS. All authors read, edited, and approved the final manuscript.

**Funding** This work was supported and sponsored by NeRRe Therapeutics Ltd. The sponsor was involved in the study design; in the collection, analysis and interpretation of the data; in the writing of the report; and in the decision to submit the paper for publication. ML is funded in part through NIH/NCI Cancer Center Support Grant P30 CA008748.

**Competing interests** MT is a current employee and ER is a past employee of NeRRe Therapeutics Ltd. BV and PG received payment from NeRRe as investigators in this study. AD received payment from NeRRe for service as the Chief Medical Officer for this study. DJ is an employee of Croomsources, which received payment from NeRRe for statistical analysis of this study. PH has received payment from NeRRe as a consultant. ML reports receiving personal fees from Legacy Healthcare Services, AdgeroBio Pharmaceuticals, Amryt Pharma, Celldex Therapeutics, Debiopharm, Galderma Research and Development, Johnson & Johnson, Novocure, Lindi Skin, Merck Sharp and Dohme Corporation, Helsinn Healthcare SA, Janssen Research & Development LLC, Menlo Therapeutics, Novartis Pharmaceuticals Corporation, F. Hoffmann-La Roche AG, Abbvie Inc. Boehringer Ingelheim Pharma GmbH & Co. KG, Allergan Inc, Amgen Inc, E.R. Squibb & Sons L.L.C., EMD Serono Inc, AstraZeneca Pharmaceuticals LP, Genentech Inc, Leo Pharma Inc, Seattle Genetics, Bayer, Männer SAS, Lutris Pharma, Pierre Fabre, Paxman Cooler Ltd, Adjucare, Dignitana, Biotechspert, Teva Pharmaceuticals Mexico, Parexel, OnQuality Pharmaceuticals Ltd, Novartis, Our Brain Bank, Millenium Pharmaceuticals and research funding from Berg Health, Bristol-Myers Squibb, Lutris Pharma, Novocure, Paxman, Biotest, and Veloce BioPharma. GT reports no conflicts of interest. AW reports receiving payment from NeRRe as Chair of the Advisory Board and from Advent Life Sciences for consultancy, Canbex Therapeutics as a nonexecutive director (past position), Calcico Therapeutics as chairman (past position) and a nonexecutive director, and the Wellcome Trust as a member of grant committees. SS reports receiving payment from NeRRe as a member of the advisory board and from Almirall, Astellas Pharma, Beiersdorf, Celgene Corporation, Chugai Pharma, Creabilis, Daiichi Sankyo, Galderma, Helsinn, Kiniska Pharmaceuticals, Kneipp, Maruho Co, Merz Pharma, Novartis, Pierre Fabre Laboratories, Sienna Biopharmaceuticals, and Ziarco as a member of their advisory boards and from Menlo Therapeutics as an investigator and participation as an investigator in trials sponsored by Dermascence, Trevi Therapeutics, and Vanda Pharmaceuticals.

**Patient consent** All patients provided written informed consent for participation before enrolment in the trial.

**Ethics approval** This trial was approved by Ethics Committees for all investigational sites.

**Provenance and peer review** Not commissioned; externally peer reviewed.

**Data sharing statement** The deidentified data set for this study is available upon reasonable request from the study sponsor NeRRe Therapeutics Ltd.

**Open access** This is an open access article distributed in accordance with the Creative Commons Attribution Non Commercial (CC BY-NC 4.0) license, which permits others to distribute, remix, adapt, build upon this work non-commercially, and license their derivative works on different terms, provided the original work is properly cited, appropriate credit is given, any changes made indicated, and the use is non-commercial. See: <http://creativecommons.org/licenses/by-nc/4.0/>.

## REFERENCES

1. Ensslin CJ, Rosen AC, Wu S, et al. Pruritus in patients treated with targeted cancer therapies: systematic review and meta-analysis. *J Am Acad Dermatol* 2013;69:708–20.
2. Santoni M, Conti A, Andrikou K, et al. Risk of pruritus in cancer patients treated with biological therapies: a systematic review and meta-analysis of clinical trials. *Crit Rev Oncol Hematol* 2015;96:206–19.
3. Boone SL, Rademaker A, Liu D, et al. Impact and management of skin toxicity associated with anti-epidermal growth factor receptor therapy: survey results. *Oncology* 2007;72:152–9.

4. Balagula Y, Lacouture ME, Cotliar JA. Dermatologic toxicities of targeted anticancer therapies. *J Support Oncol* 2010;8:149–61.
5. Fischer A, Rosen AC, Ensslin CJ, et al. Pruritus to anticancer agents targeting the EGFR, BRAF, and CTLA-4. *Dermatol Ther* 2013;26:135–48.
6. Lacouture ME, Anadkat MJ, Bensadoun RJ, et al. Clinical practice guidelines for the prevention and treatment of EGFR inhibitor-associated dermatologic toxicities. *Support Care Cancer* 2011;19:1079–95.
7. Clabbers JM, Boers-Doets CB, et al. Xerosis and pruritus as major EGFRi-associated adverse events. *Support Care Cancer* 2016;24:513–21.
8. Joshi SS, Ortiz S, Witherspoon JN, et al. Effects of epidermal growth factor receptor inhibitor-induced dermatologic toxicities on quality of life. *Cancer* 2010;16:3916–23.
9. Rosen AC, Case EC, Dusza SW, et al. Impact of dermatologic adverse events on quality of life in 283 cancer patients: a questionnaire study in a dermatology referral clinic. *Am J Clin Dermatol* 2013;14:327–33.
10. Santini D, Vincenzi B, Guida FM, et al. Aprepitant for management of severe pruritus related to biological cancer treatments: a pilot study. *Lancet Oncol* 2012;13:1020–24.
11. Tagrisso [prescribing information]. Wilmington, DE: AstraZeneca Pharmaceuticals LP; 2015.
12. Bauer KA, Hammerman S, Rapoport B, et al. Completeness in the reporting of dermatologic adverse drug reactions associated with monoclonal antibody epidermal growth factor receptor inhibitors in phase II and III colorectal cancer clinical trials. *Clin Colorectal Cancer* 2008;7:309–14.
13. Gandhi M, Oishi K, Zubal B, et al. Unanticipated toxicities from anticancer therapies: survivors' perspectives. *Support Care Cancer* 2010;18:1461–8.
14. Chan A, Tan EH. How well does the MESTT correlate with CTCAE scale for the grading of dermatological toxicities associated with oral tyrosine kinase inhibitors? *Support Care Cancer* 2011;19:1667–74.
15. Ständer S, Luger TA. NK-1 antagonists and itch. *Handb Exp Pharmacol* 2015;226:237–55.
16. Gerber PA, Buhren BA, Cevikbas F, et al. Preliminary evidence for a role of mast cells in epidermal growth factor receptor inhibitor-induced pruritus. *J Am Acad Dermatol* 2010;63:163–5.
17. Gerber PA, Buhren BA, Homey B. More on aprepitant for erlotinib-induced pruritus. *N Engl J Med* 2011;364:486–7.
18. Harrison S, Geppetti P. Substance P. *Int J Biochem Cell Biol* 2001;33:555–76.
19. Ständer S, Siepmann D, Herrgott I, et al. Targeting the neurokinin receptor 1 with aprepitant: a novel antipruritic strategy. *PLoS One* 2010;5:e10968.
20. Duval A, Dubertret L. Aprepitant as an antipruritic agent? *N Engl J Med* 2009;361:1415–6.
21. Booken N, Heck M, Nicolay JP, et al. Oral aprepitant in the therapy of refractory pruritus in erythrodermic cutaneous T-cell lymphoma. *Br J Dermatol* 2011;164:665–7.
22. Torres T, Fernandes I, Selores M, et al. Aprepitant: evidence of its effectiveness in patients with refractory pruritus continues. *J Am Acad Dermatol* 2012;66:e14–5.
23. Ladizinski B, Bazakas A, Olsen EA. Aprepitant: a novel neurokinin-1 receptor/substance P antagonist as antipruritic therapy in cutaneous T-cell lymphoma. *J Am Acad Dermatol* 2012;67:e198–9.
24. Vincenzi B, Fratto ME, Santini D, et al. Aprepitant against pruritus in patients with solid tumours. *Support Care Cancer* 2010;18:1229–30.
25. Vincenzi B, Tonini G, Santini D. Aprepitant for erlotinib-induced pruritus. *N Engl J Med* 2010;363:397–8.
26. Levêque D. Aprepitant for erlotinib-induced pruritus. *N Engl J Med* 2010;363:1680–1.
27. Mir O, Blanchet B, Goldwasser F. More on aprepitant for erlotinib-induced pruritus. *N Engl J Med* 2011;364:487.
28. Vincenzi B, Tonini G, Santini D. Aprepitant for erlotinib-induced pruritus. *N Engl J Med* 2010;364:397–8.
29. Ally MS, Gamba CS, Peng DH, et al. The use of aprepitant in brachioradial pruritus. *JAMA Dermatol* 2013;49:627–8.
30. Huh JW, Jeong YI, Choi KH, et al. Treatment for refractory pruritus using oral aprepitant. *Ann Dermatol* 2016;28:124–5.
31. Jiménez Gallo D, Albarrán Planelles C, Linares Barrios M, et al. Treatment of pruritus in early-stage hypopigmented mycosis fungoides with aprepitant. *Dermatol Ther* 2014;27:178–82.
32. Borja-Consigliere HA, López-Pestaña A, Vidal-Manceñido MJ, et al. Aprepitant in the treatment of refractory pruritus secondary to cutaneous T-cell lymphoma. *Actas Dermosifiliogr* 2014;105:716–8.
33. Song JS, Tawa M, Chau NG, et al. Aprepitant for refractory cutaneous T-cell lymphoma-associated pruritus: 4 cases and a review of the literature. *BMC Cancer* 2017;17:200. doi: 10.1186/s12885-017-3194-8.

- 1  
2  
3 34. Phan NQ, Blome C, Frit F, et al. Assessment of pruritus intensity: prospective study on validity and reliability  
4 of the visual analogue scale, numerical rating scale and verbal rating scale in 471 patients with chronic pruritus.  
5 *Acta Derm Venereol* 2012;92:502–7.  
6 35. Chren, MM. The Skindex instruments to measure the effects of skin disease on quality of life. *Dermatol Clin*  
7 2012;30:231–6.  
8 36. Pinto C, Barone CA, Girolomoni G, et al. Management of skin toxicity associated with cetuximab treatment in  
9 combination with chemotherapy or radiotherapy. *Oncologist* 2011;16:228–38.  
10 37. Van Laarhoven AI, van der Sman-Mauriks IM, Donders AR, et al. Placebo effects on itch: a meta-analysis of  
11 clinical trials of patients with dermatological conditions. *J Invest Dermatol* 2015;135:1234–43.  
12 38. Ständer S, Kwon P, Luger T. A randomized, double-blind, placebo-controlled study of the neurokinin-1  
13 receptor (NK1-R) antagonist serlopitant in subjects with prurigo nodularis (PN). Paper presented at: 2017  
14 Annual Meeting of the American Association of Dermatology; March 3-7, 2017; Orlando, FL.  
15 39. Lacouture ME, Schadendorf D, Chu CY, et al. Dermatologic adverse events associated with afatinib: an oral  
16 ErbB family blocker. *Expert Rev Anticancer Ther* 2013;13:721–8.  
17  
18  
19  
20  
21  
22  
23  
24  
25  
26  
27  
28  
29  
30  
31  
32  
33  
34  
35  
36  
37  
38  
39  
40  
41  
42  
43  
44  
45  
46  
47  
48  
49  
50  
51  
52  
53  
54  
55  
56  
57  
58  
59  
60

1  
2  
3  
4  
5  
6  
7  
8  
9  
10  
11  
12  
13  
14  
15  
16  
17  
18  
19  
20  
21  
22  
23  
24  
25  
26  
27  
28  
29  
30  
31  
32  
33  
34  
35  
36  
37  
38  
39  
40  
41  
42  
43  
44  
45  
46  
47  
48  
49  
50  
51  
52  
53  
54  
55  
56  
57  
58  
59  
60

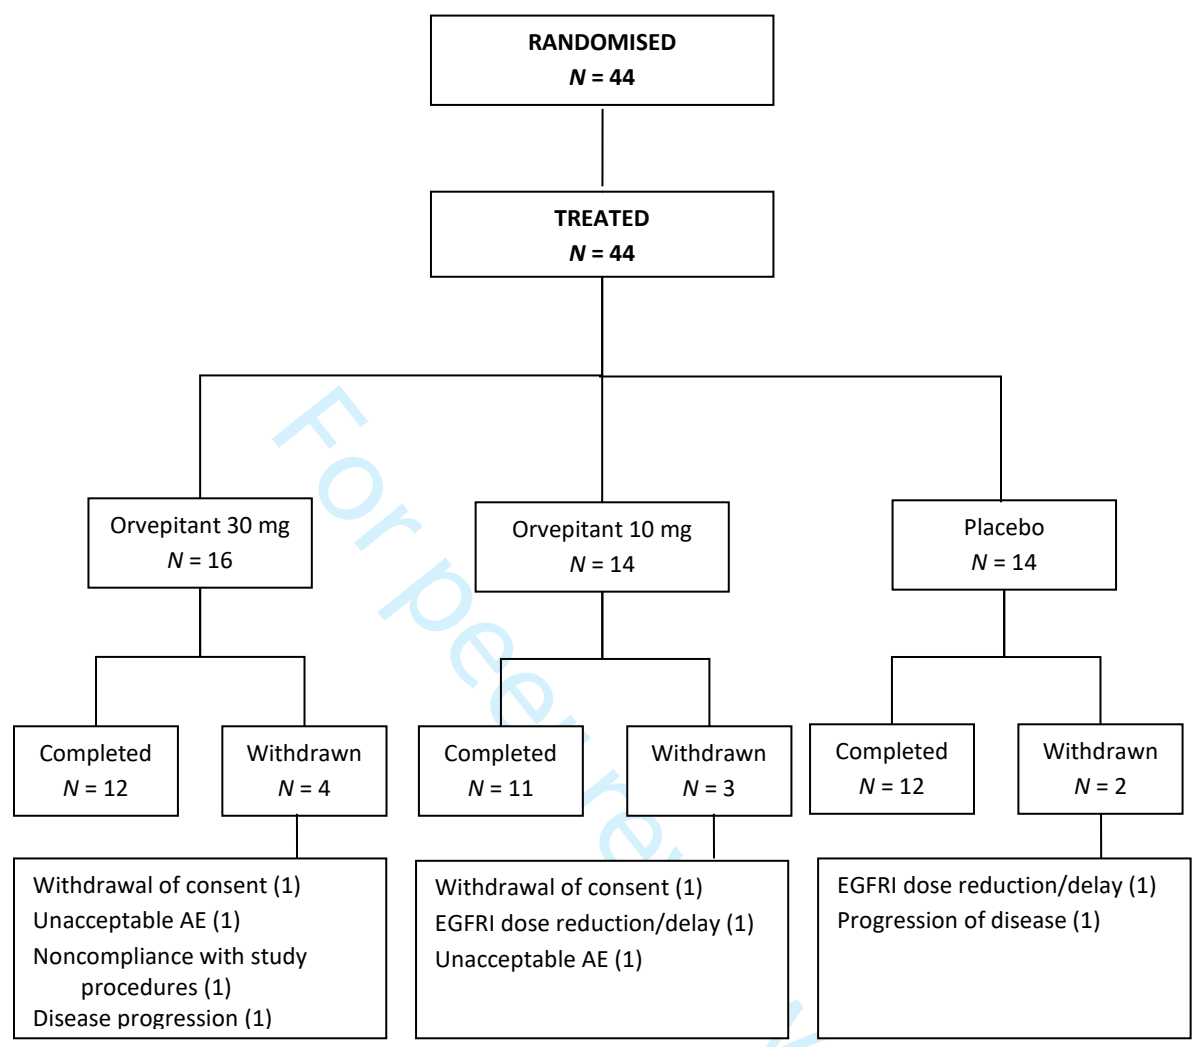

**Supplemental Table 1. Summary of secondary efficacy endpoints**

| Statistic                                                     | Orvepitant 30 mg<br>N = 16 | Orvepitant 10 mg<br>N = 14 | Placebo<br>N = 14    |
|---------------------------------------------------------------|----------------------------|----------------------------|----------------------|
| <b>Change from Baseline, (n) Mean (SD)</b>                    |                            |                            |                      |
| Mean patient-recorded NRS score (last 3 recordings) at Week 1 | (16) -1.18 (1.547)         | (13) -1.66 (2.477)         | (14) -1.16 (1.407)   |
| Mean patient-recorded NRS score (last 3 recordings) at Week 4 | (13) -2.78 (2.644)         | (11) -3.04 (3.062)         | (14) -3.21 (1.768)   |
| Mean patient-recorded NRS score (last 3 recordings) at Week 8 | (11) -2.86 (2.907)         | (10) -3.18 (2.676)         | (12) -4.32 (2.272)   |
| Mean patient-recorded NRS score (all week) at Week 1          | (16) -0.96 (1.094)         | (13) -1.34 (1.933)         | (14) -0.86 (1.002)   |
| Mean patient-recorded NRS score (all week) at Week 4          | (13) -2.64 (2.613)         | (11) -3.05 (2.998)         | (14) -3.20 (1.961)   |
| Mean patient-recorded NRS score (all week) at Week 8          | (11) -2.65 (2.810)         | (10) -3.15 (2.663)         | (12) -4.29 (2.328)   |
| Clinic visit NRS score at Week 1                              | (14) -1.93 (1.730)         | (14) -2.21 (3.191)         | (14) -3.00 (2.602)   |
| Clinic visit NRS score at Week 4                              | (13) -3.38 (2.694)         | (11) -4.27 (2.936)         | (14) -4.14 (2.179)   |
| Clinic visit NRS score at Week 8                              | (13) -3.50 (2.714)         | (11) -3.91 (2.663)         | (12) -3.92 (2.353)   |
| Pruritus intensity (from patient-recorded NRS) at Day 2       | (16) -0.61 (1.287)         | (12) -0.84 (1.242)         | (13) -0.33 (0.735)   |
| Pruritus intensity (from patient-recorded NRS) at Day 3       | (14) -0.96 (0.985)         | (11) -0.86 (1.638)         | (13) -0.41 (0.647)   |
| Pruritus intensity (from patient-recorded NRS) at Day 4       | (14) -0.85 (1.093)         | (12) -1.04 (1.880)         | (14) -0.81 (1.276)   |
| Pruritus intensity (from patient-recorded NRS) at Day 5       | (13) -1.35 (1.120)         | (12) -1.29 (2.229)         | (13) -1.18 (1.453)   |
| Pruritus intensity (from patient-recorded NRS) at Day 6       | (14) -1.28 (1.680)         | (11) -1.31 (2.203)         | (11) -1.30 (1.544)   |
| Pruritus intensity (from patient-recorded NRS) at Day 7       | (14) -1.42 (2.300)         | (12) -1.87 (3.626)         | (13) -1.33 (1.886)   |
| Pruritus intensity (from patient-recorded NRS) at Day 8       | (14) -1.85 (2.305)         | (11) -1.83 (2.417)         | (14) -1.88 (2.027)   |
| Skindex-16 at Week 1: Symptoms                                | (14) -12.56 (22.253)       | (13) 1.24 (25.053)         | (13) -2.88 (18.502)  |
| Skindex-16 at Week 4: Symptoms                                | (13) -8.29 (25.056)        | (11) -9.09 (36.936)        | (13) -7.69 (29.558)  |
| Skindex-16 at Week 8: Symptoms                                | (12) -8.09 (23.603)        | (11) -8.71 (36.190)        | (12) -4.02 (33.301)  |
| Skindex-16 at Week 1: Emotions                                | (14) -44.73 (16.352)       | (13) -21.52 (27.804)       | (13) -21.29 (18.203) |
| Skindex-16 at Week 4: Emotions                                | (13) -32.60 (24.955)       | (11) -31.96 (36.342)       | (13) -25.69 (26.543) |
| Skindex-16 at Week 8: Emotions                                | (12) -35.37 (30.875)       | (11) -37.23 (28.133)       | (12) -36.86 (26.317) |
| Skindex-16 at Week 1: Functioning                             | (14) -13.33 (16.692)       | (13) -12.05 (29.078)       | (13) -1.28 (13.508)  |
| Skindex-16 at Week 4: Functioning                             | (13) 2.05 (26.511)         | (11) -11.51 (36.066)       | (13) -1.80 (20.395)  |
| Skindex-16 at Week 8: Functioning                             | (12) -0.83 (28.038)        | (11) -22.73 (25.638)       | (12) -5.00 (16.174)  |



|                                                            |                      |                      |                     |
|------------------------------------------------------------|----------------------|----------------------|---------------------|
| LSEQ at Week 1: Getting to sleep                           | (13) -12.08 (22.103) | (12) -9.82 (23.495)  | (12) -6.45 (16.971) |
| LSEQ at Week 4: Getting to sleep                           | (12) -12.36 (19.608) | (9) 3.37 (23.642)    | (12) -8.47 (18.190) |
| LSEQ at Week 8: Getting to sleep                           | (11) -4.57 (13.665)  | (9) 2.04 (25.470)    | (11) -7.06 (23.678) |
| LSEQ at Week 1: Quality of sleep                           | (13) -6.77 (26.983)  | (12) -13.29 (33.394) | (12) -5.67 (15.389) |
| LSEQ at Week 4: Quality of sleep                           | (12) -6.46 (20.633)  | (9) -8.61 (39.094)   | (12) -9.13 (17.601) |
| LSEQ at Week 8: Quality of sleep                           | (11) -6.46 (20.633)  | (9) -8.61 (39.094)   | (11) -9.13 (17.601) |
| LSEQ at Week 1: Awake following sleep                      | (13) 5.85 (19.797)   | (12) -12.08 (32.389) | (12) -2.04 (15.497) |
| LSEQ at Week 4: Awake following sleep                      | (12) 8.29 (16.218)   | (8) -8.00 (43.825)   | (12) -4.13 (19.931) |
| LSEQ at Week 8: Awake following sleep                      | (11) 7.23 (16.912)   | (9) -10.72 (36.141)  | (11) -7.55 (30.057) |
| LSEQ at Week 1: Behaviour following wakening               | (13) 3.90 (12.435)   | (12) -3.89 (32.063)  | (12) -3.67 (7.671)  |
| LSEQ at Week 4: Behaviour following wakening               | (12) 1.03 (15.971)   | (9) 5.78 (46.411)    | (12) -9.89 (14.530) |
| LSEQ at Week 8: Behaviour following wakening               | (11) -0.36 (13.725)  | (9) 6.82 (49.170)    | (11) -1.82 (19.954) |
| <b>Change from Baseline, n (%)</b>                         |                      |                      |                     |
| Clinic visit VRS score at Week 1                           |                      |                      |                     |
| Improved                                                   | 8 (57.1)             | 9 (64.3)             | 9 (64.3)            |
| No change                                                  | 5 (35.7)             | 3 (21.4)             | 4 (28.6)            |
| Worsened                                                   | 1 (7.1)              | 2 (14.3)             | 1 (7.1)             |
| Clinic visit VRS score at Week 4                           |                      |                      |                     |
| Improved                                                   | 10 (76.9)            | 8 (80.0)             | 11 (78.6)           |
| No change                                                  | 3 (23.1)             | 2 (20.0)             | 2 (14.3)            |
| Worsened                                                   | 0                    | 0                    | 1 (7.1)             |
| Clinic visit VRS score at Week 8                           |                      |                      |                     |
| Improved                                                   | 9 (75.0)             | 9 (81.8)             | 9 (81.8)            |
| No change                                                  | 3 (25.0)             | 2 (18.2)             | 2 (18.2)            |
| Worsened                                                   | 0                    | 0                    | 0                   |
| <b>Change from Week 4, (n) Mean (SD)</b>                   |                      |                      |                     |
| Change from Week 4 in patient-recorded NRS score at Week 5 | (13) -0.41 (1.409)   | (10) -0.47 (1.989)   | (14) -0.69 (0.991)  |
| Change from Week 4 in patient-recorded NRS score at Week 6 | (13) -0.46 (1.561)   | (10) -0.83 (2.196)   | (13) -0.69 (0.897)  |
| Change from Week 4 in patient-recorded NRS score at Week 7 | (12) 0.17 (1.972)    | (10) 0.00 (3.604)    | (12) -0.72 (1.127)  |
| Change from Week 4 in patient-recorded NRS score at Week 8 | (11) -0.42 (2.071)   | (10) -0.33 (3.728)   | (12) -0.92 (1.084)  |
| Change from Week 4 in clinic visit VRS score at Week 8     |                      |                      |                     |
|                                                            | (12) -0.08 (1.730)   | (11) 0.36 (3.501)    | (12) 0.08 (1.165)   |
| <b>Number of Subjects (%)</b>                              |                      |                      |                     |
| EGFRI dose reduction                                       | 3 (18.8)             | 2 (14.3)             | 2 (14.3)            |

|                                                                                                                                                                                    |   |   |   |
|------------------------------------------------------------------------------------------------------------------------------------------------------------------------------------|---|---|---|
| Withdrawal because of intense uncontrolled pruritus                                                                                                                                | 0 | 0 | 0 |
| EGFRI = epidermal growth factor receptor inhibitor; LSEQ = Leeds Sleep Evaluation Questionnaire; NRS = numerical rating scale; SD = standard deviation; VRS = verbal rating scale. |   |   |   |

For peer review only

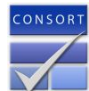

## CONSORT 2010 checklist of information to include when reporting a randomised trial\*

| Section/Topic                    | Item No | Checklist item                                                                                                                                                                              | Reported on page No |
|----------------------------------|---------|---------------------------------------------------------------------------------------------------------------------------------------------------------------------------------------------|---------------------|
| <b>Title and abstract</b>        |         |                                                                                                                                                                                             |                     |
|                                  | 1a      | Identification as a randomised trial in the title                                                                                                                                           | 1                   |
|                                  | 1b      | Structured summary of trial design, methods, results, and conclusions (for specific guidance see CONSORT for abstracts)                                                                     | 2                   |
| <b>Introduction</b>              |         |                                                                                                                                                                                             |                     |
| Background and objectives        | 2a      | Scientific background and explanation of rationale                                                                                                                                          | 3                   |
|                                  | 2b      | Specific objectives or hypotheses                                                                                                                                                           | 3                   |
| <b>Methods</b>                   |         |                                                                                                                                                                                             |                     |
| Trial design                     | 3a      | Description of trial design (such as parallel, factorial) including allocation ratio                                                                                                        | 3                   |
|                                  | 3b      | Important changes to methods after trial commencement (such as eligibility criteria), with reasons                                                                                          | 4                   |
| Participants                     | 4a      | Eligibility criteria for participants                                                                                                                                                       | 4                   |
|                                  | 4b      | Settings and locations where the data were collected                                                                                                                                        | 4                   |
| Interventions                    | 5       | The interventions for each group with sufficient details to allow replication, including how and when they were actually administered                                                       | 4                   |
| Outcomes                         | 6a      | Completely defined pre-specified primary and secondary outcome measures, including how and when they were assessed                                                                          | 4                   |
|                                  | 6b      | Any changes to trial outcomes after the trial commenced, with reasons                                                                                                                       | Not applicable      |
| Sample size                      | 7a      | How sample size was determined                                                                                                                                                              | 4                   |
|                                  | 7b      | When applicable, explanation of any interim analyses and stopping guidelines                                                                                                                | Not applicable      |
| <b>Randomisation:</b>            |         |                                                                                                                                                                                             |                     |
| Sequence generation              | 8a      | Method used to generate the random allocation sequence                                                                                                                                      | 4                   |
|                                  | 8b      | Type of randomisation; details of any restriction (such as blocking and block size)                                                                                                         | 4                   |
| Allocation concealment mechanism | 9       | Mechanism used to implement the random allocation sequence (such as sequentially numbered containers), describing any steps taken to conceal the sequence until interventions were assigned | 4                   |
| Implementation                   | 10      | Who generated the random allocation sequence, who enrolled participants, and who assigned participants to interventions                                                                     | 4                   |
| Blinding                         | 11a     | If done, who was blinded after assignment to interventions (for example, participants, care providers, those                                                                                | 3, 4                |

|                                                      |     |                                                                                                                                                   |                            |
|------------------------------------------------------|-----|---------------------------------------------------------------------------------------------------------------------------------------------------|----------------------------|
|                                                      |     | assessing outcomes) and how                                                                                                                       |                            |
|                                                      | 11b | If relevant, description of the similarity of interventions                                                                                       | 4                          |
| Statistical methods                                  | 12a | Statistical methods used to compare groups for primary and secondary outcomes                                                                     | 5                          |
|                                                      | 12b | Methods for additional analyses, such as subgroup analyses and adjusted analyses                                                                  | Not applicable             |
| <b>Results</b>                                       |     |                                                                                                                                                   |                            |
| Participant flow (a diagram is strongly recommended) | 13a | For each group, the numbers of participants who were randomly assigned, received intended treatment, and were analysed for the primary outcome    | 5, 6                       |
|                                                      | 13b | For each group, losses and exclusions after randomisation, together with reasons                                                                  | Figure 1                   |
| Recruitment                                          | 14a | Dates defining the periods of recruitment and follow-up                                                                                           | 4                          |
|                                                      | 14b | Why the trial ended or was stopped                                                                                                                | 4                          |
| Baseline data                                        | 15  | A table showing baseline demographic and clinical characteristics for each group                                                                  | 5, 6                       |
| Numbers analysed                                     | 16  | For each group, number of participants (denominator) included in each analysis and whether the analysis was by original assigned groups           | 6                          |
| Outcomes and estimation                              | 17a | For each primary and secondary outcome, results for each group, and the estimated effect size and its precision (such as 95% confidence interval) | 6, 7, Supplemental Table 1 |
|                                                      | 17b | For binary outcomes, presentation of both absolute and relative effect sizes is recommended                                                       | Not applicable             |
| Ancillary analyses                                   | 18  | Results of any other analyses performed, including subgroup analyses and adjusted analyses, distinguishing pre-specified from exploratory         | Not applicable             |
| Harms                                                | 19  | All important harms or unintended effects in each group (for specific guidance see CONSORT for harms)                                             | 7                          |
| <b>Discussion</b>                                    |     |                                                                                                                                                   |                            |
| Limitations                                          | 20  | Trial limitations, addressing sources of potential bias, imprecision, and, if relevant, multiplicity of analyses                                  | 8                          |
| Generalisability                                     | 21  | Generalisability (external validity, applicability) of the trial findings                                                                         | 8                          |
| Interpretation                                       | 22  | Interpretation consistent with results, balancing benefits and harms, and considering other relevant evidence                                     | 8                          |
| <b>Other information</b>                             |     |                                                                                                                                                   |                            |
| Registration                                         | 23  | Registration number and name of trial registry                                                                                                    | 2                          |
| Protocol                                             | 24  | Where the full trial protocol can be accessed, if available                                                                                       | Not applicable             |
| Funding                                              | 25  | Sources of funding and other support (such as supply of drugs), role of funders                                                                   | 8                          |

\*We strongly recommend reading this statement in conjunction with the CONSORT 2010 Explanation and Elaboration for important clarifications on all the items. If relevant, we also recommend reading CONSORT extensions for cluster randomised trials, non-inferiority and equivalence trials, non-pharmacological treatments, herbal interventions, and pragmatic trials. Additional extensions are forthcoming: for those and for up to date references relevant to this checklist, see [www.consort-statement.org](http://www.consort-statement.org).

# BMJ Open

## The neurokinin-1 antagonist orvepitant for EGFR-induced pruritus in cancer patients: a randomised, placebo-controlled, phase II trial

|                                 |                                                                                                                                                                                                                                                                                                                                                                                                                                                                                                                                                                                                                    |
|---------------------------------|--------------------------------------------------------------------------------------------------------------------------------------------------------------------------------------------------------------------------------------------------------------------------------------------------------------------------------------------------------------------------------------------------------------------------------------------------------------------------------------------------------------------------------------------------------------------------------------------------------------------|
| Journal:                        | <i>BMJ Open</i>                                                                                                                                                                                                                                                                                                                                                                                                                                                                                                                                                                                                    |
| Manuscript ID                   | bmjopen-2019-030114.R1                                                                                                                                                                                                                                                                                                                                                                                                                                                                                                                                                                                             |
| Article Type:                   | Original research                                                                                                                                                                                                                                                                                                                                                                                                                                                                                                                                                                                                  |
| Date Submitted by the Author:   | 18-Sep-2019                                                                                                                                                                                                                                                                                                                                                                                                                                                                                                                                                                                                        |
| Complete List of Authors:       | Vincenzi, Bruno; Universita Campus Bio-Medico di Roma Facolta di Medicina e Chirurgia,<br>Trower, Mike; NeRRe Therapeutics Ltd<br>Duggal, Ajay; Adnovate Clinical Development Strategies Ltd<br>Guglielmini, Pamela; A.S.O. S.S. Antonio e Biagio e C. Arrigo<br>Harris, Peter; NeRRe Therapeutics Ltd<br>Jackson, David; Cromsource<br>Lacouture, Mario E.; Mem Sloan Kettering Canc Ctr<br>Ratti, Emiliangelo; Takeda Pharmaceuticals Company<br>Tonini, Giuseppe; Università Campus Bio-Medico di Roma, Medical Oncology<br>Wood, Andrew; Idfac Ltd<br>Ständer, Sonja; University Hospital Münster, Dermatology |
| <b>Primary Subject Heading</b>: | Dermatology                                                                                                                                                                                                                                                                                                                                                                                                                                                                                                                                                                                                        |
| Secondary Subject Heading:      | Oncology, Pharmacology and therapeutics                                                                                                                                                                                                                                                                                                                                                                                                                                                                                                                                                                            |
| Keywords:                       | EGFR Inhibitor, neurokinin-1 antagonist, orvepitant, pruritus                                                                                                                                                                                                                                                                                                                                                                                                                                                                                                                                                      |
|                                 |                                                                                                                                                                                                                                                                                                                                                                                                                                                                                                                                                                                                                    |

SCHOLARONE™  
Manuscripts



I, the Submitting Author has the right to grant and does grant on behalf of all authors of the Work (as defined in the below author licence), an exclusive licence and/or a non-exclusive licence for contributions from authors who are: i) UK Crown employees; ii) where BMJ has agreed a CC-BY licence shall apply, and/or iii) in accordance with the terms applicable for US Federal Government officers or employees acting as part of their official duties; on a worldwide, perpetual, irrevocable, royalty-free basis to BMJ Publishing Group Ltd ("BMJ") its licensees and where the relevant Journal is co-owned by BMJ to the co-owners of the Journal, to publish the Work in this journal and any other BMJ products and to exploit all rights, as set out in our [licence](#).

The Submitting Author accepts and understands that any supply made under these terms is made by BMJ to the Submitting Author unless you are acting as an employee on behalf of your employer or a postgraduate student of an affiliated institution which is paying any applicable article publishing charge ("APC") for Open Access articles. Where the Submitting Author wishes to make the Work available on an Open Access basis (and intends to pay the relevant APC), the terms of reuse of such Open Access shall be governed by a Creative Commons licence – details of these licences and which [Creative Commons](#) licence will apply to this Work are set out in our licence referred to above.

Other than as permitted in any relevant BMJ Author's Self Archiving Policies, I confirm this Work has not been accepted for publication elsewhere, is not being considered for publication elsewhere and does not duplicate material already published. I confirm all authors consent to publication of this Work and authorise the granting of this licence.

**TITLE:** The neurokinin-1 antagonist orvepitant for EGFR-induced pruritus in cancer patients: a randomised, placebo-controlled, phase II trial

**AUTHORS:** Bruno Vincenzi<sup>1\*</sup> (0000-0001-8222-9025), Mike Trower<sup>2\*</sup> (0000-0003-0412-5719), Ajay Duggal<sup>3</sup> (0000-0003-3294-616X), Pamela Guglielmini<sup>4</sup> (0000-0003-3612-7786), Peter Harris<sup>2</sup> (0000-0002-8374-3859), David Jackson<sup>5</sup> (0000-0002-4448-8648), Mario Lacouture<sup>6</sup> (0000-0002-4818-3710), Emiliangelo Ratti<sup>7\*\*</sup> (0000-0002-7352-4695), Giuseppe Tonini<sup>1</sup> (0000-0003-4442-8677), Andrew Wood<sup>8</sup> (0000-0001-7536-6398), Sonja Ständer<sup>9</sup> (0000-0003-3612-7786)

**AFFILIATIONS:**

<sup>1</sup>Medical Oncology, Università Campus Bio-Medico di Roma, Rome, Italy

<sup>2</sup>NeRRe Therapeutics Ltd, Stevenage, UK

<sup>3</sup>Adnovate Clinical Development Strategies Ltd, East Sussex, UK

<sup>4</sup>A.S.O. S.S. Antonio e Biagio e C. Arrigo, Alessandria, Italy

<sup>5</sup>Cromsource, Stirling, UK

<sup>6</sup>Memorial Sloan Kettering Cancer Center, New York, US

<sup>7</sup>Takeda Pharmaceuticals Company, Boston, US

<sup>8</sup>Idfac Ltd, Devon, UK

<sup>9</sup>Center for Chronic Pruritus, University Hospital Münster, Münster, Germany

\*Dr Vincenzi and Dr Trower contributed equally to this work.

\*\*Current affiliation for E. Ratti

**CORRESPONDING AUTHOR:** Prof Dr Sonja Ständer

**Address:** Center for Chronic Pruritus, University Hospital Münster, Von-Esmarch-Strasse 58, D-48149 Münster, Germany

**Phone:** +49 251 8357470

**Email:** Sonja.Staender@ukmuenster.de

**WORD COUNT:** 3844 words

## ABSTRACT

**Objective** To evaluate the efficacy of orvepitant (10 or 30 mg given once daily, orally for 4 weeks), a neurokinin-1 receptor antagonist, compared with placebo in reducing the intensity of epidermal growth factor receptor inhibitor (EGFRI)-induced intense pruritus

**Design** Randomised, double-blind, placebo-controlled clinical trial

**Setting** 15 hospitals in Italy and 5 hospitals in the United Kingdom

**Participants** 44 patients aged  $\geq 18$  years receiving an EGFRI for a histologically confirmed malignant solid tumour and experiencing moderate or intense pruritus after EGFRI treatment

**Intervention** 30 mg or 10 mg orvepitant or placebo tablets once daily for 4 weeks (randomised 1:1:1)

**Primary and secondary outcome measures** The primary endpoint was change from Baseline in mean patient-recorded numerical rating scale (NRS) score (over the last 3 recordings) at Week 4. Secondary outcome measures were NRS score, verbal rating scale score, Skindex-16, and Leeds Sleep Evaluation Questionnaire at each study visit (Baseline, Weeks 1, 4, 8); rescue medication use; EGFRI dose reduction; and study withdrawal because of intense uncontrolled pruritus.

**Results** The trial was terminated early because of recruitment challenges; only 44 of the planned 90 patients were randomised. All patients were analysed for efficacy and safety. Mean NRS score change from Baseline to Week 4 was -2.78 (SD: 2.64) points in the 30 mg group, -3.04 (SD: 3.06) points in the 10 mg group, and -3.21 (SD: 1.77) points in the placebo group; the difference between orvepitant and placebo was not statistically significant. No safety signal was detected. Adverse events related to orvepitant (asthenia, dizziness, dry mouth, hyperhidrosis) were all of mild or moderate severity.

**Conclusions** Orvepitant was safe and well tolerated. No difference in NRS score between the orvepitant and placebo groups was observed at the Week 4 primary endpoint. A number of explanations for this outcome are possible.

**Trial registration number** EudraCT 2013-002763-25

**KEY WORDS:** pruritus, EGFR inhibitor, neurokinin-1 antagonist, orvepitant

### STRENGTHS AND LIMITATIONS OF THIS STUDY

- ▶ The RELIEVE 1 study was the first randomised, double-blind, placebo-controlled study of a neurokinin-1 antagonist for EGFRI-induced pruritus.
- ▶ The RELIEVE 1 study provided new insights into the course, itch characteristics, and possible mechanism of EGFRI-induced pruritus.
- ▶ The enrolment target was not reached because of recruitment problems in the target population.



## INTRODUCTION

While targeted biological therapies have increased patient survival for several tumour types, they are linked with a variety of adverse events (AEs), particularly dermatological AEs, including acneiform rash, hair changes, mucositis, xerosis/fissures, paronychia, and pruritus. Epidermal growth factor receptor inhibitors (EGFRIs) specifically are associated with these dermatological AEs that can require dose modification or treatment interruptions and thus interfere with these potentially life-prolonging therapies.<sup>1-5</sup> Rash, xerosis, and pruritus have the greatest impact on patient quality of life.<sup>5-7</sup> Pruritus incidence reported in clinical trials of anti-EGFR monoclonal antibodies (mAbs) and small-molecule EGFRIs ranges from 8% to 69% depending on the agent involved.<sup>8-9</sup> EGFRi-induced pruritus may be underreported or incompletely reported in clinical studies.<sup>10</sup> In a survey of cancer patients and survivors, pruritus is common and debilitating.<sup>11,12</sup> Lacouture et al. reported that pruritus occurs in approximately half of all patients treated with EGFRIs.<sup>4</sup> Finally, in a review of interviews conducted with 100 patients taking mainly EGFR mAbs, 72% of patients reported experiencing pruritus.<sup>13</sup> A safe and effective cancer-supportive care therapy to ameliorate the itching burden these patients experience is urgently needed.

Neurokinin-1 (NK1) receptors are 7-transmembrane receptors with a preferred peptide agonist ligand of substance P (SP).<sup>14</sup> SP produced by peripheral skin sensory nerve fibres is thought to promote itching via activation of NK1 receptors on keratinocytes and mast cells causing local inflammatory and vasodilatory effects.<sup>15</sup> Interestingly, Gerber et al. reported that mast cells significantly accumulate in the lesional skin of patients treated with EGFRIs and suggested that the antipruritic activity of the NK1 receptor antagonist aprepitant in this population is achieved by blocking the activation of mast cell NK1 receptors by SP, thereby preventing the release of mast cell histamine and other proinflammatory/pruritogenic mediators.<sup>16-18</sup> Recently another receptor, the Mas-related G-protein coupled receptor member X2 (MrgprX2), has been shown to be activated in humans by SP, and this interaction may contribute additionally to the proinflammatory effects mediated by mast cell degranulation.<sup>19</sup> SP and the NK1 receptor are also widely expressed centrally and have a role in transmission of the peripheral itch signal via the spinal superficial dorsal horn to higher brain centres for processing.<sup>20</sup> In rodents scratching behaviour can be blocked by neurotoxic destruction of spinal NK1 receptor-expressing neurons,<sup>21,22</sup> and *Tac1* (the gene encoding SP)-expressing spinal neurons has also been linked to the promotion of scratching behaviour.<sup>23</sup> Intradermal injection of SP in humans causes pruritus, erythema, and oedema.<sup>24-26</sup> Scratching behaviour induced by intradermal injection of either SP or a NK1 agonist or topical administration of a hapten in animals can all be profoundly reduced by NK1 antagonist treatment, including both orvepitant and aprepitant.<sup>27-30</sup> These data suggest that the NK1 receptor system is involved in itch signalling and therefore blockade of these pathways with NK1 receptor antagonists represents a potentially promising therapy for pruritic conditions, including EGFRi-induced pruritus.<sup>31,32</sup>

Aprepitant (Emend<sup>®</sup>, formerly MK-869) is the first commercially available drug of a new class of NK1 receptor antagonists for the prevention of chemotherapy-induced and postoperative nausea and vomiting. It has been evaluated in numerous open-label clinical studies of patients suffering from treatment-refractory pruritus, including a large number of patients suffering with acute EGFRi-induced pruritus.<sup>33-49</sup> In these uncontrolled studies, aprepitant acted as a rapid and highly effective antipruritic medication that also significantly improved patients' quality of life, leading to advocacy for clinical assessment of aprepitant and other emerging NK1 receptor antagonists in patients receiving agents with a high risk of pruritus.<sup>50</sup>

Like aprepitant, orvepitant is an orally active, potent, brain-penetrant, and selective non-surmountable NK1 antagonist that blocks SP signalling.<sup>51-53</sup> These compounds are active in the well characterised NK1 receptor pharmacodynamic gerbil foot-tapping model, in preclinical models of anxiety,<sup>51-54</sup> and, as reported above, in the gerbil scratching behaviour model.<sup>28,29</sup> In humans both compounds have pharmacokinetic properties consistent with once-daily oral dosing sufficient to achieve therapeutic plasma exposures that have high levels of central NK1 receptor occupancy.<sup>55,56</sup> Thus, orvepitant would be expected to achieve antipruritic efficacy similar to that of aprepitant in patients suffering from intense itch as a result of EGFRi treatment. The RELIEVE 1 study evaluating

1  
2  
3 the efficacy and safety of orvepitant is the first randomised, double-blind, placebo-controlled study of an NK1  
4 antagonist for EGFR-induced pruritus.  
5

## 6 **METHODS**

### 8 **Patient and public involvement**

9  
10 The primary endpoint was a patient recorded outcome. There was no public involvement.  
11

### 12 **Study design and enrolment**

13  
14 The primary objective of this exploratory Phase 2, multicentre, randomised, double-blind, placebo-controlled  
15 clinical trial was to evaluate the efficacy of orvepitant compared with placebo in reducing the intensity of intense  
16 EGFR-induced pruritus. Pruritus intensity was measured primarily by change from Baseline in patient-recorded  
17 numerical rating scale (NRS) score ranging from 0 (no itch) to 10 (worst itch imaginable) points. On the basis of an  
18 assumed between-patient standard deviation (SD) of 2 points,<sup>8</sup> 23 patients per treatment arm were required to  
19 provide 80% power for a 2-sided 5% significance level hypothesis test to achieve a significant result when the true  
20 difference is at least 2 points. It was thus planned to enrol 30 patients per arm (90 total). After 20 months of  
21 recruitment, this target was far from being reached, and a blinded analysis of data variance indicated that it was  
22 highly unlikely that a statistically robust assessment of benefit could be made even if enrolment were completed.  
23 The sponsor decided to terminate enrolment. However, the study data for all enrolled patients were analysed.  
24  
25

### 26 **Patients and treatments**

27  
28 Patients were enrolled at 15 hospitals in Italy and 5 hospitals in the United Kingdom between 13 November 2013  
29 and 11 May 2015. Key eligibility criteria were age 18 years and older, monotherapy with an EGFR (including  
30 cetuximab, panitumumab, erlotinib, gefitinib, lapatinib, and afatinib) for a histologically confirmed malignant solid  
31 tumour, moderate or intense pruritus after treatment with the EGFR (defined as the mean of between 2 and 7 daily  
32 patient-reported average pruritus intensity NRS scores initially  $\geq 7$  and subsequently changed in April 2014 to  $\geq 5$   
33 to improve study recruitment), pruritus treatment within the previous 3 months, and no use of aprepitant or  
34 fosaprepitant in the previous 4 weeks. The investigators randomised eligible patients according to a central  
35 randomisation code generated by the sponsor using an interactive voice response system (IVRS). The patients were  
36 assigned in a 1:1:1 ratio to receive 30 mg orvepitant, 10 mg orvepitant, or placebo tablets once daily (in the evening  
37 before bedtime) for 4 weeks. Randomisation was stratified by investigational site; block size was 6. Placebo tablets  
38 were identical in appearance to orvepitant tablets.  
39  
40

### 41 **Assessments**

42  
43 Patients were followed-up for 4 weeks after treatment was completed or discontinued. Patients reported their NRS  
44 scores daily using an IVRS between Baseline and Week 8. At each study visit (Baseline, Week 1, Week 4, Week 8)  
45 an NRS score and a verbal rating scale (VRS) score were recorded. The VRS score was assigned in response to the  
46 following questions: How intense was your pruritus during the past 24 hours? Did you have no pruritus, weak  
47 pruritus, moderate pruritus, severe pruritus, or very severe pruritus? Scores ranged from 0 (no pruritus) to 4 (very  
48 severe pruritus). Both the NRS and VRS are validated instruments for the measurement of pruritus intensity.<sup>57</sup> At  
49 each study visit, the patients also completed the Skindex-16 (an instrument to measure the effects of skin disease on  
50 health-related quality of life),<sup>58</sup> and the Leeds Sleep Evaluation Questionnaire (LSEQ; a 10-item instrument to  
51 assess changes in sleep quality over the course of an intervention). Safety was assessed by physical examination  
52 (including Eastern Cooperative Oncology Group [ECOG] status) and 12-lead electrocardiogram (ECG) at Baseline  
53 and Week 8, vital signs and laboratory tests (haematology, serum biochemistry, urinalysis) at each visit, and  
54 recording of AEs throughout the study. AEs were graded and categorised according to the National Cancer  
55 Institute's Common Terminology Criteria for Adverse Events (CTCAE). Use of concomitant medications, including  
56  
57  
58  
59  
60

EGFRIs and any rescue medication, was recorded throughout the study. Sparse pharmacokinetic sampling was conducted to allow for exploratory analysis of the correlation of orvepitant plasma levels with clinical efficacy and secondary assessment scores.

### Endpoints

The primary endpoint was change from Baseline in mean patient-recorded NRS score (over the last 3 recordings) at Week 4 for orvepitant 30 mg versus placebo. Secondary endpoints were also evaluated: change from Baseline in mean patient-recorded NRS score (last 3 recordings) each week; change from Baseline in mean patient-recorded NRS score (all values in the week) at Weeks 1, 4, 8; change from Baseline in patient-recorded NRS score at Days 2, 3, 4, 5, 6, 7, 8; change from Week 4 in patient-recorded NRS score (over the last 3 recordings) at Weeks 5, 6, 7, 8; change from Week 4 in VRS score at Week 8; change from Baseline in Skindex-16 quality of life at Weeks, 1, 4, 8; change from Baseline in LSEQ at Weeks, 1, 4, 8; rescue medication use; EGFRi dose reduction; and study withdrawal because of intense uncontrolled pruritus.

### Statistical analysis

Efficacy endpoints were analysed in the intention-to-treat (ITT) population of all randomised patients who had received at least the first dose of study medication and had at least 1 post-treatment efficacy assessment. The primary endpoint was analysed by mixed-model repeated measures analysis with the primary inference being the change from Baseline in patient-reported NRS scores averaged across the last 3 values of the fourth week of dosing fitted as the response variable in the mixed model. The model included treatment group, study pooled site, study visit, the interaction between study visit and treatment group, the covariate (the baseline value of the variable being analysed) and the interaction between baseline covariate and visit. The 3 treatment groups were analysed together in one model. Point estimates and corresponding 95% confidence intervals were constructed for the difference between each dose of orvepitant and placebo for each week. The primary efficacy endpoint was tested at a 5% level of significance using a two-sided test to test orvepitant 30 mg versus placebo, and no adjustment for multiple comparisons was made for the patient-recorded NRS score orvepitant 10 mg versus placebo test or the secondary and exploratory endpoints. Safety was analysed in the safety population of all patients who received a dose of study medication using descriptive statistics.

## RESULTS

### Patients

A total of 44 patients were randomised and treated: 16 to orvepitant 30 mg, 14 to orvepitant 10 mg, and 14 to placebo. Nine patients discontinued the study (Figure 1). All patients were Caucasian, and 26 (59%) were male and 18 (41%) female. Median age was 68 years (range: 35 to 83 years), and 32 (73%) patients were aged 65 or older. Mean baseline NRS score ranged from 5.88 (SD: 0.93) in the placebo group to 6.68 (SD: 1.28) in the 30 mg orvepitant group. At Baseline, most patients had moderate to severe pruritus, and the most common locations were the head (specifically the scalp 26 [59%] patients) and the trunk (11 [25%]). Baseline assessments of acneiform rash and maculopapular rash showed a similar pattern (Table 1).

**Table 1. Demographic and baseline characteristics**

| Characteristic              | Orvepitant 30 mg<br>N = 16 | Orvepitant 10 mg<br>N = 14 | Placebo<br>N = 14 | Total<br>N = 44 |
|-----------------------------|----------------------------|----------------------------|-------------------|-----------------|
| Age (years), median (range) | 69.0 (43, 83)              | 73.5 (49, 81)              | 67.0 (35, 76)     | 68.0 (35, 83)   |
| Age groups, n (%)           |                            |                            |                   |                 |

|                                                      |                 |                  |                 |               |
|------------------------------------------------------|-----------------|------------------|-----------------|---------------|
| < 65 years                                           | 4 (25.0)        | 4 (28.6)         | 4 (28.6)        | 12 (27.3)     |
| ≥ 65 years                                           | 12 (75.0)       | 10 (71.4)        | 10 (71.4)       | 32 (72.7)     |
| Gender, n (%)                                        |                 |                  |                 |               |
| Female                                               | 5 (31.3)        | 5 (35.7)         | 8 (57.1)        | 18 (40.9)     |
| Male                                                 | 11 (68.8)       | 9 (64.3)         | 6 (42.9)        | 26 (59.1)     |
| Race, n (%)                                          |                 |                  |                 |               |
| Caucasian                                            | 16 (100.0)      | 14 (100.0)       | 14 (100.0)      | 44 (100.0)    |
| Time since cancer diagnosis (months), median (range) | 17.5 (1, 131)   | 29.7 (12, 129)   | 20.8 (5, 60)    | 23.0 (1, 131) |
| Patient-reported NRS score                           |                 |                  |                 |               |
| Mean (SD)                                            | 6.68 (1.278)    | 6.95 (1.413)     | 5.88 (0.930)    | NC            |
| Median (range)                                       | 6.86 (4.8, 9.3) | 7.00 (5.0, 10.0) | 5.57 (5.0, 7.4) | NC            |
| <b>PRURITUS</b>                                      |                 |                  |                 |               |
| CTCAE grade, n (%)                                   |                 |                  |                 |               |
| Grade 1                                              | 2 (12.5)        | 0                | 0               | 2 (4.5)       |
| Grade 2                                              | 8 (50.0)        | 9 (64.3)         | 11 (78.6)       | 28 (63.6)     |
| Grade 3                                              | 5 (31.3)        | 5 (35.7)         | 3 (21.4)        | 13 (29.5)     |
| Unknown                                              | 1 (6.3)         | 0                | 0               | 1 (2.3)       |
| Location, n (%)                                      |                 |                  |                 |               |
| Head                                                 | 8 (50.0)        | 6 (42.9)         | 12 (85.7)       | 26 (59.1)     |
| Trunk                                                | 7 (43.8)        | 3 (21.4)         | 1 (7.1)         | 11 (25.0)     |
| Arms                                                 | 0               | 3 (21.4)         | 0               | 3 (6.8)       |
| Legs                                                 | 0               | 2 (14.3)         | 1 (7.1)         | 3 (6.8)       |
| Unknown                                              | 1 (6.3)         | 0                | 0               | 1 (2.3)       |
| <b>ACNEIFORM RASH</b>                                |                 |                  |                 |               |
| CTCAE grade, n (%)                                   |                 |                  |                 |               |
| Grade 1                                              | 2 (12.5)        | 3 (21.4)         | 2 (14.3)        | 7 (15.9)      |
| Grade 2                                              | 7 (43.8)        | 7 (50.0)         | 10 (71.4)       | 24 (54.5)     |
| Grade 3                                              | 6 (37.5)        | 3 (21.4)         | 1 (7.1)         | 10 (22.7)     |
| Unknown                                              | 1 (6.3)         | 1 (7.1)          | 1 (7.1)         | 3 (6.8)       |
| Location, n (%)                                      |                 |                  |                 |               |
| Head                                                 | 7 (43.8)        | 5 (35.7)         | 11 (78.6)       | 23 (52.3)     |
| Trunk                                                | 7 (43.8)        | 5 (35.7)         | 0               | 12 (27.3)     |
| Arms                                                 | 1 (6.3)         | 3 (21.4)         | 1 (7.1)         | 5 (11.4)      |
| Legs                                                 | 0               | 0                | 1 (7.1)         | 1 (2.3)       |
| Unknown                                              | 1 (6.3)         | 1 (7.1)          | 1 (7.1)         | 3 (6.8)       |
| <b>MACULOPAPULAR RASH</b>                            |                 |                  |                 |               |
| CTCAE grade, n (%)                                   |                 |                  |                 |               |
| Grade 1                                              | 3 (18.8)        | 5 (35.7)         | 5 (35.7)        | 13 (29.5)     |
| Grade 2                                              | 8 (50.0)        | 5 (35.7)         | 8 (57.1)        | 21 (47.7)     |
| Grade 3                                              | 4 (25.0)        | 3 (21.4)         | 0               | 7 (15.9)      |
| Unknown                                              | 1 (6.3)         | 1 (7.1)          | 1 (7.1)         | 3 (6.8)       |
| Location, n (%)                                      |                 |                  |                 |               |
| Head                                                 | 7 (43.8)        | 5 (35.7)         | 12 (85.7)       | 24 (54.5)     |

|         |          |          |         |           |
|---------|----------|----------|---------|-----------|
| Trunk   | 7 (43.8) | 4 (28.6) | 0       | 11 (25.0) |
| Arms    | 1 (6.3)  | 4 (28.6) | 0       | 5 (11.4)  |
| Legs    | 0        | 0        | 1 (7.1) | 1 (2.3)   |
| Unknown | 1 (6.3)  | 1 (7.1)  | 1 (7.1) | 3 (6.8)   |

CTCAE = Common Terminology Criteria for Adverse Events; NC = not calculated; NRS = numerical rating scale; SD = standard deviation.

The median dose number was 28 (range: 1 to 35) in the 30 mg group, 28 (range: 1 to 35) in the 10 mg group, and 29 (range: 28 to 39) in the placebo group. Five (11%) patients (all in the orvepitant groups) took the study drug for 1 week or less; 18 (41%) patients took the study drug (orvepitant or placebo) for 1 to 4 weeks, and 21 (48%) took the study drug for >4 weeks (maximum: 39 days).

All 44 patients were included in the ITT and safety populations and analysed according to the randomised treatment.

### Efficacy

Patient compliance with daily reporting of NRS score was high; mean compliance rate was 92%, and median compliance rate was 100%. At Week 4, 38 subjects remained in the study. NRS score decreased from Baseline to Week 4 in all 3 groups (Table 2). The difference between orvepitant and placebo was not, however, statistically significant (30 mg group:  $P = 0.12$ , 10 mg group:  $P = 0.19$ ).

**Table 2. Change from Baseline in patient-reported numerical reporting scale scores at Week 4**

| Statistic                                 | Orvepitant 30 mg<br><i>N</i> = 16 | Orvepitant 10 mg<br><i>N</i> = 14 | Placebo<br><i>N</i> = 14 |
|-------------------------------------------|-----------------------------------|-----------------------------------|--------------------------|
| <b>n</b>                                  | <b>13</b>                         | <b>11</b>                         | <b>14</b>                |
| Mean (SD)                                 | -2.78 (2.64)                      | -3.04 (3.06)                      | -3.21 (1.77)             |
| Median                                    | -2.75                             | -2.00                             | -2.50                    |
| Minimum, maximum                          | -6.3, 3.0                         | -8.3, 1.1                         | -6.3, 0.0                |
| LSMEANS estimate (95% CI)                 | -2.40 (-3.54, -1.27)              | -2.53 (-3.80, -1.27)              | -3.70 (-4.88, -2.52)     |
| LSMEANS standard error                    | 0.56                              | 0.62                              | 0.58                     |
| Orvepitant vs placebo difference (95% CI) | 1.30 (-0.35, 2.95)                | 1.17 (-0.62, 2.96)                |                          |
| <i>P</i> value                            | 0.120                             | 0.194                             |                          |

CI = confidence interval; LSMEANS = least-squares means; SD = standard deviation.  
 Note: Analysis results from mixed-model repeated measures analysis (Week 1 to Week 4) of the 3 treatment groups analysed together in one model: Change from Baseline = Treatment + Pooled Site + Visit + Treatment\*Visit + Baseline Results + Visit\*Baseline Covariate Interaction

Secondary NRS and VRS endpoints reflected the results for the primary endpoint (Supplemental Table 1). Change from Baseline in Skindex-16 and LSEQ score showed no difference between the treatment groups at any time point. Rescue medication use and EGFR dose reduction both occurred in 7 (16%) patients (3 in the orvepitant 30 mg group and 2 each in the orvepitant 10 mg and placebo groups). No subjects withdrew from the study because of intense uncontrolled pruritus.

Analyses of pharmacokinetic data were not conducted because of the lack of efficacy observed.

## Safety

No safety signal was detected. A total of 34 (77%) patients experienced a treatment-emergent AE, but no unexpected AEs were reported. Only 4 mild and moderate AEs were considered by investigators to be related to orvepitant (Table 3). AEs that occurred in >5% of patients were asthenia (8 [18%] patients), skin toxicity (7 [16%] patients); term reported by the investigators was skin toxicity, which for EGFRIs commonly includes reactions such as skin rash, skin dryness [xerosis], pruritus, paronychia, hair abnormality, mucositis, and increased, growth of the eyelashes or facial hair<sup>59</sup>), diarrhoea (4 [9%] patients), cough (3 [7%] patients), rash (3 [7%] patients; terms as reported by the investigators included worsening of rash; hands, ankle and face rash; and rash cutaneous), and anaemia (3 [7%] patients). These more common AEs occurred in similar rates in the active and placebo groups except for anaemia and rash, which occurred infrequently and only in patients who received orvepitant. There was no apparent relationship between incidence or severity of AEs and orvepitant dose. No serious AEs were reported.

**Table 3. Drug-related adverse events**

|                     | <b>Orvepitant 30 mg</b><br><b>N = 16</b><br><b>n (%)</b> | <b>Orvepitant 10 mg</b><br><b>N = 14</b><br><b>n (%)</b> | <b>Placebo</b><br><b>N = 14</b><br><b>n (%)</b> |
|---------------------|----------------------------------------------------------|----------------------------------------------------------|-------------------------------------------------|
| Any drug-related AE | 3 (18.8)                                                 | 1 (7.1)                                                  | 0                                               |
| <b>Mild AEs</b>     |                                                          |                                                          |                                                 |
| Asthenia            | 1 (6.3)                                                  | 0                                                        | 0                                               |
| Dizziness           | 0                                                        | 1 (7.1)                                                  | 0                                               |
| Dry mouth           | 1 (6.3)                                                  | 0                                                        | 0                                               |
| <b>Moderate AEs</b> |                                                          |                                                          |                                                 |
| Hyperhidrosis       | 1 (6.3)                                                  | 0                                                        | 0                                               |

No clinically significant changes in laboratory results, vital signs, physical examination findings, ECOG status, or ECG parameters were related to orvepitant.

## DISCUSSION

### Strengths and limitations of the study

The RELIEVE 1 study was the first randomised, double-blind, placebo-controlled study of an NK1 receptor antagonist for EGFRi-induced pruritus. The enrolment target was not reached because of recruitment problems in the critically ill target population. A similar response was seen in both placebo and active groups, a result for which there are several possible explanations. Nonetheless, this randomised, controlled study provided insights into the course, itch characteristics, and possible mechanisms of EGFRi-induced pruritus that may inform future studies.

### Interpretation of the results

Orvepitant appeared safe and well tolerated, and the findings in this study are consistent with the substantial safety database accumulated to date on this product in different populations. The safety profile exhibited allows further investigation of orvepitant in this or other indications, including a planned Phase 3 study in refractory or unexplained chronic cough following a successful Phase 2 study in this indication.<sup>60</sup>

The efficacy results were, however, inconclusive; no significant difference between the active groups and the placebo group was observed. Patients experienced a mean reduction in itching of approximately 3 NRS points in the

2 orvepitant groups and the placebo group. This outcome may, of course, have resulted from the premature termination of the study and the consequent substantially reduced sample size making it difficult to determine a treatment difference. However, given there was no indication of difference between the arms, then it seems unlikely even if the study had been fully recruited that a treatment effect would have been detected. This outcome stands in stark contrast to the observation studies conducted with the NK1 antagonist aprepitant.<sup>33-49</sup> For example, in a 1-week, open-label study in 45 patients experiencing mainly EGFR-induced severe pruritus, aprepitant therapy resulted in median visual analogue scale itch scores falling from 8 at Baseline to 1 after 7 days in a refractory group resistant to standard anti-pruritus treatments and from 8 to 0 in a naive group ( $p < 0.0001$  in both groups).<sup>8</sup> In this trial 41 (91%) patients responded to aprepitant (i.e., had a  $>50\%$  reduction in pruritus intensity), and pruritus recurred in only 6 (13%) patients. This difference is difficult to rationalise given that the pharmacology of orvepitant and aprepitant are so comparable and both can achieve exposures likely to be therapeutic in humans following oral dosing. However, one plausible explanation for the results in the RELIEVE 1 study is the placebo effect that is often seen in clinical trials with subjective endpoints such as pruritus intensity.<sup>61</sup> In this study, critically ill patients were receiving a modern antineoplastic therapy, and they may have had a particularly high expectation of the benefit of their EGFR therapy in general and of orvepitant's ability to reduce pruritus and thereby improve their quality of life.

A further explanation for the RELIEVE 1 study results relates to the pathological mechanism underlying the itch in these patients. EGFR-induced pruritus arises acutely within the first 2 weeks after initiation of the anticancer therapy<sup>5</sup> and cutaneous accumulation, and activation of dermal mast cells<sup>16,17,62</sup> may be the most important driver of the itch signalling in these patients. This acute course contrasts with that of chronic pruritus conditions (defined as being  $>6$  weeks in duration),<sup>63</sup> which are now linked to the sensitisation of itch signalling pathways similar to chronic pain, such that patients may report spontaneous itch (alloknesis) or an enhanced itch to normal itch-evoking stimuli (hyperknesis).<sup>32,64,65</sup> NK1 antagonists have shown great promise in randomised, placebo-controlled clinical studies as treatments for chronic pruritus conditions in general<sup>66,67</sup> as well as specifically for prurigo nodularis,<sup>68</sup> atopic dermatitis-associated pruritus,<sup>69</sup> and psoriasis-associated pruritus.<sup>70</sup> Orvepitant has shown efficacy against chronic refractory cough, which has also been recognised as a neural hypersensitivity syndrome.<sup>60</sup> Thus, NK1 antagonists may lack efficacy in acute pruritic conditions driven by cutaneous mast cells, such as EGFR-induced pruritus, whilst being effective in chronic pruritus conditions by addressing itch pathway sensitisation.

A final explanation is that the improvement in itch scores seen in the 2 orvepitant groups and the placebo group may be attributable to the natural course of pruritus over the weeks following the initiation of EGFR treatment. It is now known that patterns of cutaneous toxicities with EGFR treatment can vary with time; for example, the intensity of acneiform rash that is associated with pruritus rises and falls dramatically in the first month.<sup>71</sup> If this were the case for itch intensity, it would be difficult to show a benefit against such a dynamic and self-limiting background.

### Implications for future studies

Recruitment for this study was stopped after 20 months when only 44 of the planned 90 subjects had been enrolled. Despite evidence in the literature of a high prevalence of EGFR-induced pruritus,<sup>1-11,13,50,72,73</sup> we experienced substantial difficulty identifying patients with severe enough pruritus (i.e., NRS score  $\geq 5$ ) to enable detection of post-treatment change. Study enrolment may have been limited by the fact that all investigators were oncologists, who are faced with multiple AEs in patients receiving EGFRs (e.g., diarrhoea, rash, asthenia, nausea and vomiting, conjunctivitis, mucositis) that may have taken precedence over pruritus, a purely subjective symptom that is not widely reported in the oncology community.<sup>10</sup> Patients may also have been unwilling to enter the study because pruritus is not a major priority for them compared to their cancer.

NK1 antagonists may still hold potential for treatment of skin toxicities experienced by cancer patients treated with EGFRs or other targeted therapies. However, future studies will require a more complete understanding of the epidemiology and course of target cancer therapy-induced pruritus to enable appropriate selection and sizing of the

1  
2  
3 patient population to achieve statistical power and a design that minimises or quantifies the placebo effect.  
4 Furthermore, greater knowledge of the pathological mechanism underlying the pruritus in this condition is needed.  
5 Without these advances, the experience of this trial shows that further investigation of this particular drug-induced  
6 pruritus condition at the current juncture will prove challenging.  
7

## 8 **FIGURE LEGENDS**

### 10 **Figure 1. Disposition of RELIEVE 1 patients**

12 **Acknowledgements** We thank Anne McDonough, a professional medical writer who provided medical writing  
13 support funded by NeRRe Therapeutics Ltd.  
14

15 **Contributors** Study concept and design: BV, MT, PH, ML, ER, GT, AW, SS; data acquisition: BV, PG; quality  
16 control of data and algorithms: PH, DJ; data analysis and interpretation: BV, MT, AD, SS; statistical analysis: DJ;  
17 manuscript preparation: MT; manuscript editing: BV, MT, SS. All authors read, edited, and approved the final  
18 manuscript.  
19

20 **Funding** This work was supported and sponsored by NeRRe Therapeutics Ltd. The sponsor was involved in the  
21 study design; in the collection, analysis and interpretation of the data; in the writing of the report; and in the decision  
22 to submit the paper for publication. ML is funded in part through NIH/NCI Cancer Center Support Grant P30  
23 CA008748.  
24

25 **Competing interests** MT is a current employee and ER is a past employee of NeRRe Therapeutics Ltd, and both  
26 are inventors on a granted patent on novel uses of orvepitant. BV and PG received payment from NeRRe as  
27 investigators in this study. AD received payment from NeRRe for service as the Chief Medical Officer for this  
28 study. DJ is an employee of Cromsource, which received payment from NeRRe for statistical analysis of this study.  
29 PH has received payment from NeRRe as a consultant. ML reports receiving personal fees from Legacy Healthcare  
30 Services, AdgeroBio Pharmaceuticals, Amryt Pharma, Celldex Therapeutics, Debiopharm, Galderma Research and  
31 Development, Johnson & Johnson, Novocure, Lindi Skin, Merck Sharp and Dohme Corporation, Helsinn Healthcare  
32 SA, Janssen Research & Development LLC, Menlo Therapeutics, Novartis Pharmaceuticals Corporation, F.  
33 Hoffmann-La Roche AG, Abbvie Inc. Boehringer Ingelheim Pharma Gmbh & Co. KG, Allergan Inc, Amgen Inc,  
34 E.R. Squibb & Sons L.L.C., EMD Serono Inc, AstraZeneca Pharmaceuticals LP, Genentech Inc, Leo Pharma Inc,  
35 Seattle Genetics, Bayer, Männer SAS, Lutris Pharma, Pierre Fabre, Paxman Cooler Ltd, Adjucare, Dignitana,  
36 Biotechspert, Teva Pharmaceuticals Mexico, Parexel, OnQuality Pharmaceuticals Ltd, Novartis, Our Brain Bank,  
37 Millenium Pharmaceuticals and research funding from Berg Health, Bristol-Myers Squibb, Lutris Pharma,  
38 Novocure, Paxman, Biotest, and Veloce BioPharma. GT reports no conflicts of interest. AW reports receiving  
39 payment from NeRRe as Chair of the Advisory Board and from Advent Life Sciences for consultancy, Canbex  
40 Therapeutics as a nonexecutive director (past position), Calcico Therapeutics as chairman (past position) and a  
41 nonexecutive director (past position), and the Wellcome Trust as a member of grant committees. SS reports  
42 receiving payment from NeRRe as a member of the advisory board and from Almirall, Astellas Pharma, Beiersdorf,  
43 Celgene Corporation, Chugai Pharma, Creabilis, Daiichi Sankyo, Galderma, Helsinn, Kiniska Pharmaceuticals,  
44 Kneipp, Maruho Co, Merz Pharma, Novartis, Pierre Fabre Laboratories, Sienna Biopharmaceuticals, and Ziarc  
45 as a member of their advisory boards and from Menlo Therapeutics as an investigator and participation as an investigator  
46 in trials sponsored by Dermascence, Trevi Therapeutics, and Vanda Pharmaceuticals.  
47  
48  
49  
50

51 **Patient consent** All patients provided written informed consent for participation before enrolment in the trial.  
52

53 **Ethics approval** This trial was approved by Ethics Committees for all investigational sites.  
54

55 **Provenance and peer review** Not commissioned; externally peer reviewed.  
56  
57



**Data sharing statement** The deidentified data set for this study is available upon reasonable request from the study sponsor NeRRRe Therapeutics Ltd.

**Open access** This is an open access article distributed in accordance with the Creative Commons Attribution Non Commercial (CC BY-NC 4.0) license, which permits others to distribute, remix, adapt, build upon this work non-commercially, and license their derivative works on different terms, provided the original work is properly cited, appropriate credit is given, any changes made indicated, and the use is non-commercial. See: <http://creativecommons.org/licenses/by-nc/4.0/>.

## REFERENCES

1. Boone SL, Rademaker A, Liu D, et al. Impact and management of skin toxicity associated with anti-epidermal growth factor receptor therapy: survey results. *Oncology* 2007;72:152–9.
2. Balagula Y, Lacouture ME, Cotliar JA. Dermatologic toxicities of targeted anticancer therapies. *J Support Oncol* 2010;8:149–61.
3. Fischer A, Rosen AC, Ensslin CJ, et al. Pruritus to anticancer agents targeting the EGFR, BRAF, and CTLA-4. *Dermatol Ther* 2013;26:135–48.
4. Lacouture ME, Anadkat MJ, Bensadoun RJ, et al. Clinical practice guidelines for the prevention and treatment of EGFR inhibitor-associated dermatologic toxicities. *Support Care Cancer* 2011;19:1079–95.
5. Clabbers JM, Boers-Doets CB, et al. Xerosis and pruritus as major EGFR-associated adverse events. *Support Care Cancer* 2016;24:513–21.
6. Joshi SS, Ortiz S, Witherspoon JN, et al. Effects of epidermal growth factor receptor inhibitor-induced dermatologic toxicities on quality of life. *Cancer* 2010;16:3916–23.
7. Rosen AC, Case EC, Dusza SW, et al. Impact of dermatologic adverse events on quality of life in 283 cancer patients: a questionnaire study in a dermatology referral clinic. *Am J Clin Dermatol* 2013;14:327–33.
8. Santini, D, Vincenzi B, Guida FM, et al. Aprepitant for management of severe pruritus related to biological cancer treatments: a pilot study. *Lancet Oncol* 2012;13:1020–24.
9. Tagrisso [prescribing information]. Wilmington, DE: AstraZeneca Pharmaceuticals LP; 2015.
10. Bauer KA, Hammerman S, Rapoport B, et al. Completeness in the reporting of dermatologic adverse drug reactions associated with monoclonal antibody epidermal growth factor receptor inhibitors in phase II and III colorectal cancer clinical trials. *Clin Colorectal Cancer* 2008;7:309–14.
11. Gandhi M, Oishi K, Zubal B, et al. Unanticipated toxicities from anticancer therapies: survivors' perspectives. *Support Care Cancer* 2010;18:1461–8.
12. Cho SI, Lee J, Lim J, et al. Pruritus in patients under targeted anticancer therapy: A multidimensional analysis using the 5-D itch scale. *Acta Derm Venereol* 2019;99:435–41.
13. Chan A, Tan EH. How well does the MESTT correlate with CTCAE scale for the grading of dermatological toxicities associated with oral tyrosine kinase inhibitors? *Support Care Cancer* 2011;19:1667–74.
14. Steinhoff MS, von Mentzer B, Geppetti P, et al. Tachykinins and their receptors: contributions to physiological control and the mechanisms of disease. *Physiol Rev* 2014;94:265–301.
15. Benecke H, Lotts T, Ständer S. Investigational drugs for pruritus. *Expert Opin Investig Drugs* 2013;22:1167–79.
16. Gerber PA, Buhren BA, Cevikbas F, et al. Preliminary evidence for a role of mast cells in epidermal growth factor receptor inhibitor-induced pruritus. *J Am Acad Dermatol* 2010;63:163–5.
17. Gerber PA, Buhren BA, Homey B. More on aprepitant for erlotinib-induced pruritus. *N Engl J Med* 2011;364:486–7.
18. Harrison S, Geppetti P. Substance P. *Int J Biochem Cell Biol* 2001;33:555–76.
19. Azimi E, Reddy VB, Pereira PJS, et al. Substance P activates Mas-related G protein-coupled receptors to induce itch. *J Allergy Clin Immunol* 2017;140(2):447–53.
20. Carstens E, Akiyama T. Central mechanisms of itch. *Curr Probl Dermatol* 2016;50:11–7.
21. Carstens EE, Carstens MI, Simons CT, et al. Dorsal horn neurons expressing NK-1 receptors mediate scratching in rats. *Neuroreport* 2010;21:303–8.
22. Akiyama T, Nguyen T, Curtis E, et al. A central role for spinal dorsal horn neurons that express neurokinin-1 receptors in chronic itch. *Pain* 2015;156:1240–6.
23. Gao ZR, Chen WZ, Liu MZ, et al. Tac1-expressing neurons in the periaqueductal gray facilitate the itch-scratching cycle via descending regulation. *Neuron* 2019;101:45–59.

24. Hägermark O, Hökfelt T, Pernow B. Flare and itch induced by substance P in human skin. *J Invest Dermatol* 1978;71:233–5.
25. Heyer G, Hornstein OP, Handwerker HO. Reactions to intradermally injected substance P and topically applied mustard oil in atopic dermatitis patients. *Acta Derm Venereol* 1991;71:291–5.
26. Thomsen JS, Sonne M, Benfeldt E, et al. Experimental itch in sodium lauryl sulphate-inflamed and normal skin in humans: A randomised, double-blind, placebo-controlled study of histamine and other inducers of itch. *Br J Dermatol* 2002;146:792–800.
27. Andoh T, Nagasawa T, Satoh M, et al. Substance P induction of itch-associated response mediated by cutaneous NK1 tachykinin receptors in mice. *J Pharmacol Exp Ther* 1998;286:1140–5.
28. Trower MK, Fisher A, Upton N, et al. Neurokinin-1 receptor antagonist orvepitant is an effective inhibitor of itch-associated response in a Mongolian gerbil model of scratching behaviour. *Exp Dermatol* 2014;23:858–60.
29. Costantini VJ, Corsi M, Dünstl G, et al. The NK1 receptor antagonist aprepitant attenuates NK1 agonist-induced scratching behaviour in the gerbil after intra-dermal, topical or oral administration. *Exp Dermatol* 2015;24:312–4.
30. Ueda Y, Inoue T, Rahman MA, et al. A new chronic itch model accompanied by skin lesions in hairless mice. *Int Immunopharmacol* 2006;6:1609–15.
31. Ständer S, Luger TA. NK-1 antagonists and itch. *Handb Exp Pharmacol* 2015;226:237–55.
32. Ständer S, Yosipovitch G. Substance P and neurokinin 1 receptor are new targets for the treatment of chronic pruritus. *Br J Dermatol* 2019. doi: 10.1111/bjd.18025. [Epub ahead of print]
33. Ständer S, Siepmann D, Herrgott I, et al. Targeting the neurokinin receptor 1 with aprepitant: a novel antipruritic strategy. *PLoS One* 2010;5:e10968.
34. Duval A, Dubertret L. Aprepitant as an antipruritic agent? *N Engl J Med* 2009;361:1415–6.
35. Booken N, Heck M, Nicolay JP, et al. Oral aprepitant in the therapy of refractory pruritus in erythrodermic cutaneous T-cell lymphoma. *Br J Dermatol* 2011;164:665–7.
36. Torres T, Fernandes I, Selores M, et al. Aprepitant: evidence of its effectiveness in patients with refractory pruritus continues. *J Am Acad Dermatol* 2012;66:e14–5.
37. Ladizinski B, Bazakas A, Olsen EA. Aprepitant: a novel neurokinin-1 receptor/substance P antagonist as antipruritic therapy in cutaneous T-cell lymphoma. *J Am Acad Dermatol* 2012;67:e198–9.
38. Vincenzi B, Fratto ME, Santini D, et al. Aprepitant against pruritus in patients with solid tumours. *Support Care Cancer* 2010;18:1229–30.
39. Vincenzi B, Tonini G, Santini D. Aprepitant for erlotinib-induced pruritus. *N Engl J Med* 2010; 363:397–8.
40. Levêque D. Aprepitant for erlotinib-induced pruritus. *N Engl J Med* 2010;363:1680–1.
41. Mir O, Blanchet B, Goldwasser F. More on aprepitant for erlotinib-induced pruritus. *N Engl J Med* 2011;364:487.
42. Vincenzi B, Tonini G, Santini D. Aprepitant for erlotinib-induced pruritus. *N Engl J Med* 2010;364:397–8.
43. Ally MS, Gamba CS, Peng DH, et al. The use of aprepitant in brachioradial pruritus. *JAMA Dermatol* 2013;49:627–8.
44. Huh JW, Jeong YI, Choi KH, et al. Treatment for refractory pruritus using oral aprepitant. *Ann Dermatol* 2016;28:124–5.
45. Jiménez Gallo D, Albarrán Planelles C, Linares Barrios M, et al. Treatment of pruritus in early-stage hypopigmented mycosis fungoides with aprepitant. *Dermatol Ther* 2014;27:178–82.
46. Borja-Consigliere HA, López-Pestaña A, Vidal-Manceño MJ, et al. Aprepitant in the treatment of refractory pruritus secondary to cutaneous T-cell lymphoma. *Actas Dermosifiliogr* 2014;105:716–8.
47. Song JS, Tawa M, Chau NG, et al. Aprepitant for refractory cutaneous T-cell lymphoma-associated pruritus: 4 cases and a review of the literature. *BMC Cancer* 2017;17:200. doi: 10.1186/s12885-017-3194-8.
48. Qin H, Wang F, Wang K, et al. Aprepitant for gefitinib-induced refractory pruritus in Chinese malignancy population. *Ann Transl Med* 2019;7:54.
49. Seki N, Ochiai R, Haruyama T, et al. Need for flexible adjustment of the treatment schedule for aprepitant administration against erlotinib-induced refractory pruritus and skin rash. *Case Rep Oncol* 2019;12:84–90.
50. Santoni M, Conti A, Andrikou K, et al. Risk of pruritus in cancer patients treated with biological therapies: a systematic review and meta-analysis of clinical trials. *Crit Rev Oncol Hematol* 2015;96:206–19.
51. Di Fabio R, Alvaro G, Braggio S, et al. Identification, biological characterization and pharmacophoric analysis of a new potent and selective NK1 receptor antagonist clinical candidate. *Bioorg Med Chem* 2013;21:6264–73.
52. Lindström E, von Mentzer B, Pählman I, et al. Neurokinin 1 receptor antagonists: correlation between in vitro receptor interaction and in vivo efficacy. *J Pharmacol Exp Ther* 2007;322:1286–93.

- 1  
2  
3 53. Duffy RA, Varty GB, Morgan CA, et al. Correlation of neurokinin (NK) 1 receptor occupancy in gerbil striatum  
4 with behavioral effects of NK1 antagonists. *J Pharmacol Exp Ther* 2002;301:536–42.
- 5 54. Kramer MS, Cutler N, Feighner J, et al. Distinct mechanism for antidepressant activity by blockade of central  
6 substance P receptors. *Science* 1998;281:1640–5.
- 7 55. Ratti E, Bettica P, Alexander R, et al. Full central neurokinin-1 receptor blockade is required for efficacy in  
8 depression: evidence from orvepitant clinical studies. *J Psychopharmacol* 2013;27(5):424–34.
- 9 56. Bergström M, Hargreaves RJ, Burns HD, et al. Human positron emission tomography studies of brain  
10 neurokinin 1 receptor occupancy by aprepitant. *Biol Psychiatry* 2004;55:1007–12.
- 11 57. Phan NQ, Blome C, Frit F, et al. Assessment of pruritus intensity: prospective study on validity and reliability  
12 of the visual analogue scale, numerical rating scale and verbal rating scale in 471 patients with chronic pruritus.  
13 *Acta Derm Venereol* 2012;92:502–7.
- 14 58. Chren, MM. The Skindex instruments to measure the effects of skin disease on quality of life. *Dermatol Clin*  
15 2012;30:231–6.
- 16 59. Pinto C, Barone CA, Girolomoni G, et al. Management of skin toxicity associated with cetuximab treatment in  
17 combination with chemotherapy or radiotherapy. *Oncologist* 2011;16:228–38.
- 18 60. Smith J, Allman D, Badri Het al. The neurokinin-1 receptor antagonist orvepitant is a novel antitussive therapy  
19 for chronic refractory cough: Results from a phase 2 pilot study (VOLCANO-1). *Chest* 2019 Aug 14. pii:  
20 S0012-3692(19)31451–5.
- 21 61. Van Laarhoven AI, van der Sman-Mauriks IM, Donders AR, et al. Placebo effects on itch: a meta-analysis of  
22 clinical trials of patients with dermatological conditions. *J Invest Dermatol* 2015;135:1234–43.
- 23 62. Mascia F, Lam G, Keith C, et al. Genetic ablation of epidermal EGFR reveals the dynamic origin of adverse  
24 effects of anti-EGFR therapy. *Sci Transl Med* 2013;5:199ra110.
- 25 63. Ständer S, Weisshaar E, Mettang et al. Clinical classification of itch: a position paper of the International Forum  
26 for the Study of Itch. *Acta Derm Venereol* 2007;87:2917–4.
- 27 64. Andersen HH, Akiyama T, Nattkemper LA, et al. Alloeknesis and hyperknesis-mechanisms, assessment  
28 methodology, and clinical implications of itch sensitization. *Pain* 2018;159:1185–1197.
- 29 65. Ikoma A, Fartasch M, Heyer G, et al. Painful stimuli evoke itch in patients with chronic pruritus: central  
30 sensitization for itch. *Neurology* 2004;62:212–7.
- 31 66. Ständer S, Spellman MC, Kwon P, et al. The NK1 receptor antagonist serlopitant for treatment of chronic  
32 pruritus. *Expert Opin Investig Drugs* 2019;28:659–66.
- 33 67. Yosipovitch G, Ständer S, Kerby MB, et al. Serlopitant for the treatment of chronic pruritus: Results of a  
34 randomized, multicenter, placebo-controlled phase 2 clinical trial. *J Am Acad Dermatol* 2018;78:882–891.
- 35 68. Ständer S, Kwon P, Hirman J, et-al; Serlopitant reduced pruritus in patients with prurigo nodularis in a phase 2,  
36 randomized, placebo-controlled trial. *J Am Acad Dermatol* 2019;80:1395–402
- 37 69. Vanda Pharmaceuticals Inc. Vanda's tradipitant improves itch and disease severity in patients with atopic  
38 dermatitis. Web site. <https://vandapharmaceuticalsinc.gcs-web.com/node/8091/pdf>. Updated September 13,  
39 2017. Accessed August 28, 2019.
- 40 70. U.S. National Library of Medicine. ClinicalTrials.gov. Study of the efficacy, safety and tolerability of  
41 serlopitant for the treatment of pruritus (itch) with plaque psoriasis.  
42 <https://clinicaltrials.gov/ct2/show/results/NCT03343639?term=MTI-109&rank=1>. Updated June 27, 2019.  
43 Accessed August 28, 2019.
- 44 71. Beech J, Germetaki T, Judge M, et al. Management and grading of EGFR inhibitor-induced cutaneous toxicity.  
45 *Future Oncol* 2018;14:2531–41.
- 46 72. Ensslin CJ, Rosen AC, Wu S, et al. Pruritus in patients treated with targeted cancer therapies: systematic review  
47 and meta-analysis. *J Am Acad Dermatol* 2013;69:708–20.
- 48 73. Lacouture ME, Schadendorf D, Chu CY, et al. Dermatologic adverse events associated with afatinib: an oral  
49 ErbB family blocker. *Expert Rev Anticancer Ther* 2013;13:721–8.
- 50  
51  
52  
53  
54  
55  
56  
57  
58  
59  
60

1  
2  
3  
4  
5  
6  
7  
8  
9  
10  
11  
12  
13  
14  
15  
16  
17  
18  
19  
20  
21  
22  
23  
24  
25  
26  
27  
28  
29  
30  
31  
32  
33  
34  
35  
36  
37  
38  
39  
40  
41  
42  
43  
44  
45  
46  
47  
48  
49  
50  
51  
52  
53  
54  
55  
56  
57  
58  
59  
60

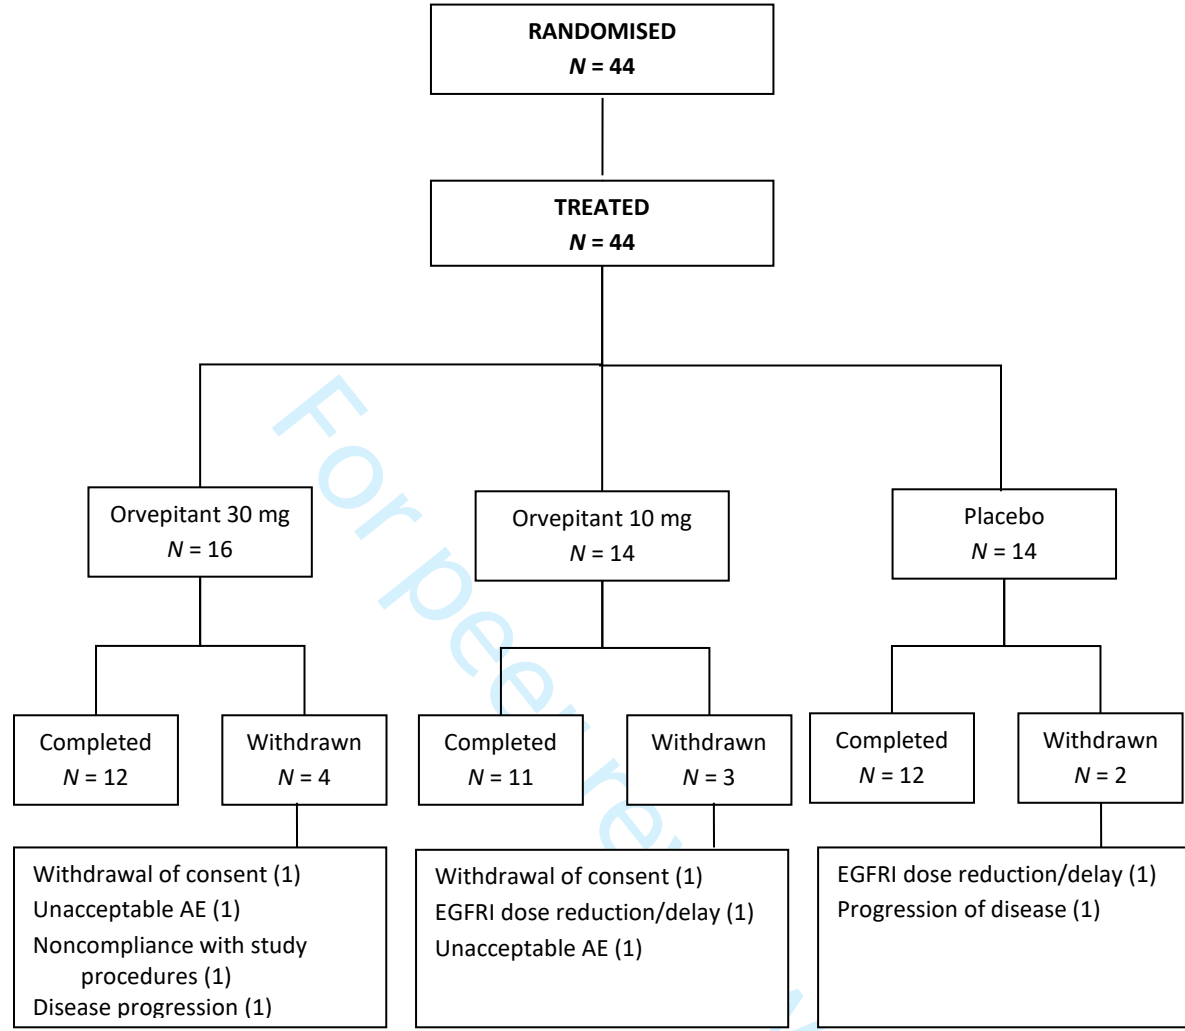

**Supplemental Table 1. Summary of secondary efficacy endpoints**

| Statistic                                                | Orvepitant 30 mg<br>N = 16 | Orvepitant 10 mg<br>N = 14 | Placebo<br>N = 14   |
|----------------------------------------------------------|----------------------------|----------------------------|---------------------|
| <b>Change from Baseline, (n) Mean (SD)</b>               |                            |                            |                     |
| Patient-recorded NRS score (last 3 recordings) at Week 1 | (16) -1.18 (1.55)          | (13) -1.66 (2.48)          | (14) -1.16 (1.41)   |
| Patient-recorded NRS score (last 3 recordings) at Week 2 | (14) -2.33 (2.00)          | (13) -2.85 (3.43)          | (13) -2.76 (1.96)   |
| Patient-recorded NRS score (last 3 recordings) at Week 3 | (14) -2.16 (2.56)          | (11) -3.14 (2.77)          | (14) -3.26 (2.00)   |
| Patient-recorded NRS score (last 3 recordings) at Week 5 | (13) -3.19 (2.88)          | (10) -3.32 (3.19)          | (14) -3.90 (2.19)   |
| Patient-recorded NRS score (last 3 recordings) at Week 6 | (13) -3.24 (2.89)          | (10) -3.68 (2.55)          | (13) -4.00 (1.78)   |
| Patient-recorded NRS score (last 3 recordings) at Week 7 | (12) -2.49 (2.91)          | (10) -2.85 (2.52)          | (12) -4.13 (2.33)   |
| Patient-recorded NRS score (last 3 recordings) at Week 8 | (11) -2.86 (2.91)          | (10) -3.18 (2.68)          | (12) -4.32 (2.27)   |
|                                                          |                            |                            |                     |
| Patient-recorded NRS score (all week) at Week 1          | (16) -0.96 (1.09)          | (13) -1.34 (1.93)          | (14) -0.86 (1.00)   |
| Patient-recorded NRS score (all week) at Week 4          | (13) -2.64 (2.61)          | (11) -3.05 (3.00)          | (14) -3.20 (1.96)   |
| Patient-recorded NRS score (all week) at Week 8          | (11) -2.65 (2.81)          | (10) -3.15 (2.66)          | (12) -4.29 (2.33)   |
|                                                          |                            |                            |                     |
| Clinic-visit NRS score at Week 1                         | (14) -1.93 (1.73)          | (14) -2.21 (3.19)          | (14) -3.00 (2.60)   |
| Clinic-visit NRS score at Week 4                         | (13) -3.38 (2.69)          | (11) -4.27 (2.94)          | (14) -4.14 (2.18)   |
| Clinic-visit NRS score at Week 8                         | (13) -3.50 (2.71)          | (11) -3.91 (2.66)          | (12) -3.92 (2.35)   |
|                                                          |                            |                            |                     |
| Patient-recorded NRS score at Day 2                      | (16) -0.61 (1.29)          | (12) -0.84 (1.24)          | (13) -0.33 (0.74)   |
| Patient-recorded NRS score at Day 3                      | (14) -0.96 (0.99)          | (11) -0.86 (1.64)          | (13) -0.41 (0.65)   |
| Patient-recorded NRS score at Day 4                      | (14) -0.85 (1.09)          | (12) -1.04 (1.88)          | (14) -0.81 (1.28)   |
| Patient-recorded NRS score at Day 5                      | (13) -1.35 (1.12)          | (12) -1.29 (2.23)          | (13) -1.18 (1.45)   |
| Patient-recorded NRS score at Day 6                      | (14) -1.28 (1.68)          | (11) -1.31 (2.20)          | (11) -1.30 (1.54)   |
| Patient-recorded NRS score at Day 7                      | (14) -1.42 (2.30)          | (12) -1.87 (3.63)          | (13) -1.33 (1.89)   |
| Patient-recorded NRS score at Day 8                      | (14) -1.85 (2.31)          | (11) -1.83 (2.42)          | (14) -1.88 (2.03)   |
|                                                          |                            |                            |                     |
| Skindex-16 at Week 1: Symptoms                           | (14) -12.56 (22.25)        | (13) 1.24 (25.05)          | (13) -2.88 (18.50)  |
| Skindex-16 at Week 4: Symptoms                           | (13) -8.29 (25.06)         | (11) -9.09 (36.94)         | (13) -7.69 (29.56)  |
| Skindex-16 at Week 8: Symptoms                           | (12) -8.09 (23.60)         | (11) -8.71 (36.19)         | (12) -4.02 (33.30)  |
| Skindex-16 at Week 1: Emotions                           | (14) -44.73 (16.35)        | (13) -21.52 (27.80)        | (13) -21.29 (18.20) |
| Skindex-16 at Week 4: Emotions                           | (13) -32.60 (24.96)        | (11) -31.96 (36.34)        | (13) -25.69 (26.54) |
| Skindex-16 at Week 8: Emotions                           | (12) -35.37 (30.88)        | (11) -37.23 (28.13)        | (12) -36.86 (26.32) |
| Skindex-16 at Week 1: Functioning                        | (14) -13.33 (16.69)        | (13) -12.05 (29.08)        | (13) -1.28 (13.51)  |
| Skindex-16 at Week 4: Functioning                        | (13) 2.05 (26.51)          | (11) -11.51 (36.07)        | (13) -1.80 (20.40)  |
| Skindex-16 at Week 8: Functioning                        | (12) -0.83 (28.04)         | (11) -22.73 (25.64)        | (12) -5.00 (16.17)  |
|                                                          |                            |                            |                     |
| LSEQ at Week 1: Getting to sleep                         | (13) -12.08 (22.10)        | (12) -9.82 (23.50)         | (12) -6.45 (16.97)  |
| LSEQ at Week 4: Getting to sleep                         | (12) -12.36 (19.61)        | (9) 3.37 (23.64)           | (12) -8.47 (18.19)  |
| LSEQ at Week 8: Getting to sleep                         | (11) -4.57 (13.67)         | (9) 2.04 (25.47)           | (11) -7.06 (23.68)  |
| LSEQ at Week 1: Quality of sleep                         | (13) -6.77 (26.98)         | (12) -13.29 (33.39)        | (12) -5.67 (15.39)  |
| LSEQ at Week 4: Quality of sleep                         | (12) -6.46 (20.63)         | (9) -8.61 (39.09)          | (12) -9.13 (17.60)  |

|                                                                                                                                                                                    |                    |                     |                     |
|------------------------------------------------------------------------------------------------------------------------------------------------------------------------------------|--------------------|---------------------|---------------------|
| LSEQ at Week 8: Quality of sleep                                                                                                                                                   | (11) -6.73 (21.81) | (9) -17.22 (34.00)  | (11) -10.14 (26.73) |
| LSEQ at Week 1: Awake following sleep                                                                                                                                              | (13) 5.85 (19.80)  | (12) -12.08 (32.39) | (12) -2.04 (15.50)  |
| LSEQ at Week 4: Awake following sleep                                                                                                                                              | (12) 8.29 (16.22)  | (8) -8.00 (43.83)   | (12) -4.13 (19.93)  |
| LSEQ at Week 8: Awake following sleep                                                                                                                                              | (11) 7.23 (16.91)  | (9) -10.72 (36.14)  | (11) -7.55 (30.06)  |
| LSEQ at Week 1: Behaviour following waking                                                                                                                                         | (13) 3.90 (12.44)  | (12) -3.89 (32.06)  | (12) -3.67 (7.67)   |
| LSEQ at Week 4: Behaviour following waking                                                                                                                                         | (12) 1.03 (15.97)  | (9) 5.78 (46.41)    | (12) -9.89 (14.53)  |
| LSEQ at Week 8: Behaviour following waking                                                                                                                                         | (11) -0.36 (13.73) | (9) 6.82 (49.17)    | (11) -1.82 (19.95)  |
| <b>Change from Baseline, n (%)</b>                                                                                                                                                 |                    |                     |                     |
| VRS score at Week 1                                                                                                                                                                |                    |                     |                     |
| Improved                                                                                                                                                                           | 8 (57.1)           | 9 (64.3)            | 9 (64.3)            |
| No change                                                                                                                                                                          | 5 (35.7)           | 3 (21.4)            | 4 (28.6)            |
| Worsened                                                                                                                                                                           | 1 (7.1)            | 2 (14.3)            | 1 (7.1)             |
| VRS score at Week 4                                                                                                                                                                |                    |                     |                     |
| Improved                                                                                                                                                                           | 10 (76.9)          | 8 (80.0)            | 11 (78.6)           |
| No change                                                                                                                                                                          | 3 (23.1)           | 2 (20.0)            | 2 (14.3)            |
| Worsened                                                                                                                                                                           | 0                  | 0                   | 1 (7.1)             |
| VRS score at Week 8                                                                                                                                                                |                    |                     |                     |
| Improved                                                                                                                                                                           | 9 (75.0)           | 9 (81.8)            | 9 (81.8)            |
| No change                                                                                                                                                                          | 3 (25.0)           | 2 (18.2)            | 2 (18.2)            |
| Worsened                                                                                                                                                                           | 0                  | 0                   | 0                   |
| <b>Change from Week 4, (n) Mean (SD)</b>                                                                                                                                           |                    |                     |                     |
| Patient-recorded NRS score (last 3 recordings) at Week 5                                                                                                                           | (13) -0.41 (1.409) | (10) -0.47 (1.989)  | (14) -0.69 (0.991)  |
| Patient-recorded NRS score (last 3 recordings) at Week 6                                                                                                                           | (13) -0.46 (1.561) | (10) -0.83 (2.196)  | (13) -0.69 (0.897)  |
| Patient-recorded NRS score (last 3 recordings) at Week 7                                                                                                                           | (12) 0.17 (1.972)  | (10) 0.00 (3.604)   | (12) -0.72 (1.127)  |
| Patient-recorded NRS score (last 3 recordings) at Week 8                                                                                                                           | (11) -0.42 (2.071) | (10) -0.33 (3.728)  | (12) -0.92 (1.084)  |
| VRS score at Week 8                                                                                                                                                                |                    |                     |                     |
|                                                                                                                                                                                    | (12) -0.08 (1.730) | (11) 0.36 (3.501)   | (12) 0.08 (1.165)   |
| <b>Number of Subjects (%)</b>                                                                                                                                                      |                    |                     |                     |
| Prescribed rescue medication                                                                                                                                                       | 6 (37.5)           | 4 (28.6)            | 2 (14.3)            |
| Used rescue medication                                                                                                                                                             | 3 (18.8)           | 2 (14.3)            | 2 (14.3)            |
| EGFRI dose reduction                                                                                                                                                               | 3 (18.8)           | 2 (14.3)            | 2 (14.3)            |
| Withdrawal because of intense uncontrolled pruritus                                                                                                                                | 0                  | 0                   | 0                   |
| EGFRI = epidermal growth factor receptor inhibitor; LSEQ = Leeds Sleep Evaluation Questionnaire; NRS = numerical rating scale; SD = standard deviation; VRS = verbal rating scale. |                    |                     |                     |

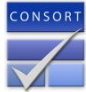

## CONSORT 2010 checklist of information to include when reporting a randomised trial\*

| Section/Topic                    | Item No | Checklist item                                                                                                                                                                              | Reported on page No |
|----------------------------------|---------|---------------------------------------------------------------------------------------------------------------------------------------------------------------------------------------------|---------------------|
| <b>Title and abstract</b>        |         |                                                                                                                                                                                             |                     |
|                                  | 1a      | Identification as a randomised trial in the title                                                                                                                                           | 1                   |
|                                  | 1b      | Structured summary of trial design, methods, results, and conclusions (for specific guidance see CONSORT for abstracts)                                                                     | 2                   |
| <b>Introduction</b>              |         |                                                                                                                                                                                             |                     |
| Background and objectives        | 2a      | Scientific background and explanation of rationale                                                                                                                                          | 3, 4                |
|                                  | 2b      | Specific objectives or hypotheses                                                                                                                                                           | 4                   |
| <b>Methods</b>                   |         |                                                                                                                                                                                             |                     |
| Trial design                     | 3a      | Description of trial design (such as parallel, factorial) including allocation ratio                                                                                                        | 4                   |
|                                  | 3b      | Important changes to methods after trial commencement (such as eligibility criteria), with reasons                                                                                          | 4                   |
| Participants                     | 4a      | Eligibility criteria for participants                                                                                                                                                       | 4                   |
|                                  | 4b      | Settings and locations where the data were collected                                                                                                                                        | 4                   |
| Interventions                    | 5       | The interventions for each group with sufficient details to allow replication, including how and when they were actually administered                                                       | 4                   |
| Outcomes                         | 6a      | Completely defined pre-specified primary and secondary outcome measures, including how and when they were assessed                                                                          | 4, 5                |
|                                  | 6b      | Any changes to trial outcomes after the trial commenced, with reasons                                                                                                                       | Not applicable      |
| Sample size                      | 7a      | How sample size was determined                                                                                                                                                              | 4                   |
|                                  | 7b      | When applicable, explanation of any interim analyses and stopping guidelines                                                                                                                | Not applicable      |
| <b>Randomisation:</b>            |         |                                                                                                                                                                                             |                     |
| Sequence generation              | 8a      | Method used to generate the random allocation sequence                                                                                                                                      | 4                   |
|                                  | 8b      | Type of randomisation; details of any restriction (such as blocking and block size)                                                                                                         | 4                   |
| Allocation concealment mechanism | 9       | Mechanism used to implement the random allocation sequence (such as sequentially numbered containers), describing any steps taken to conceal the sequence until interventions were assigned | 4                   |
| Implementation                   | 10      | Who generated the random allocation sequence, who enrolled participants, and who assigned participants to interventions                                                                     | 4                   |
| Blinding                         | 11a     | If done, who was blinded after assignment to interventions (for example, participants, care providers, those                                                                                | 4                   |

|                                                      |     |                                                                                                                                                   |                         |
|------------------------------------------------------|-----|---------------------------------------------------------------------------------------------------------------------------------------------------|-------------------------|
|                                                      |     | assessing outcomes) and how                                                                                                                       |                         |
|                                                      | 11b | If relevant, description of the similarity of interventions                                                                                       | 4                       |
| Statistical methods                                  | 12a | Statistical methods used to compare groups for primary and secondary outcomes                                                                     | 5                       |
|                                                      | 12b | Methods for additional analyses, such as subgroup analyses and adjusted analyses                                                                  | Not applicable          |
| <b>Results</b>                                       |     |                                                                                                                                                   |                         |
| Participant flow (a diagram is strongly recommended) | 13a | For each group, the numbers of participants who were randomly assigned, received intended treatment, and were analysed for the primary outcome    | 5, 6                    |
|                                                      | 13b | For each group, losses and exclusions after randomisation, together with reasons                                                                  | Figure 1                |
| Recruitment                                          | 14a | Dates defining the periods of recruitment and follow-up                                                                                           | 4                       |
|                                                      | 14b | Why the trial ended or was stopped                                                                                                                | 8,9                     |
| Baseline data                                        | 15  | A table showing baseline demographic and clinical characteristics for each group                                                                  | 5, 6                    |
| Numbers analysed                                     | 16  | For each group, number of participants (denominator) included in each analysis and whether the analysis was by original assigned groups           | 7                       |
| Outcomes and estimation                              | 17a | For each primary and secondary outcome, results for each group, and the estimated effect size and its precision (such as 95% confidence interval) | 7, Supplemental Table 1 |
|                                                      | 17b | For binary outcomes, presentation of both absolute and relative effect sizes is recommended                                                       | Not applicable          |
| Ancillary analyses                                   | 18  | Results of any other analyses performed, including subgroup analyses and adjusted analyses, distinguishing pre-specified from exploratory         | Not applicable          |
| Harms                                                | 19  | All important harms or unintended effects in each group (for specific guidance see CONSORT for harms)                                             | 8                       |
| <b>Discussion</b>                                    |     |                                                                                                                                                   |                         |
| Limitations                                          | 20  | Trial limitations, addressing sources of potential bias, imprecision, and, if relevant, multiplicity of analyses                                  | 8                       |
| Generalisability                                     | 21  | Generalisability (external validity, applicability) of the trial findings                                                                         | 8, 9                    |
| Interpretation                                       | 22  | Interpretation consistent with results, balancing benefits and harms, and considering other relevant evidence                                     | 8, 9                    |
| <b>Other information</b>                             |     |                                                                                                                                                   |                         |
| Registration                                         | 23  | Registration number and name of trial registry                                                                                                    | 2                       |
| Protocol                                             | 24  | Where the full trial protocol can be accessed, if available                                                                                       | Not applicable          |
| Funding                                              | 25  | Sources of funding and other support (such as supply of drugs), role of funders                                                                   | 10                      |

\*We strongly recommend reading this statement in conjunction with the CONSORT 2010 Explanation and Elaboration for important clarifications on all the items. If relevant, we also recommend reading CONSORT extensions for cluster randomised trials, non-inferiority and equivalence trials, non-pharmacological treatments, herbal interventions, and pragmatic trials. Additional extensions are forthcoming: for those and for up to date references relevant to this checklist, see [www.consort-statement.org](http://www.consort-statement.org).



# BMJ Open

## The neurokinin-1 antagonist orvepitant for EGFR-induced pruritus in cancer patients: a randomised, placebo-controlled, phase II trial

|                                 |                                                                                                                                                                                                                                                                                                                                                                                                                                                                                                                                                                                                                    |
|---------------------------------|--------------------------------------------------------------------------------------------------------------------------------------------------------------------------------------------------------------------------------------------------------------------------------------------------------------------------------------------------------------------------------------------------------------------------------------------------------------------------------------------------------------------------------------------------------------------------------------------------------------------|
| Journal:                        | <i>BMJ Open</i>                                                                                                                                                                                                                                                                                                                                                                                                                                                                                                                                                                                                    |
| Manuscript ID                   | bmjopen-2019-030114.R2                                                                                                                                                                                                                                                                                                                                                                                                                                                                                                                                                                                             |
| Article Type:                   | Original research                                                                                                                                                                                                                                                                                                                                                                                                                                                                                                                                                                                                  |
| Date Submitted by the Author:   | 14-Nov-2019                                                                                                                                                                                                                                                                                                                                                                                                                                                                                                                                                                                                        |
| Complete List of Authors:       | Vincenzi, Bruno; Universita Campus Bio-Medico di Roma Facolta di Medicina e Chirurgia,<br>Trower, Mike; NeRRe Therapeutics Ltd<br>Duggal, Ajay; Adnovate Clinical Development Strategies Ltd<br>Guglielmini, Pamela; A.S.O. S.S. Antonio e Biagio e C. Arrigo<br>Harris, Peter; NeRRe Therapeutics Ltd<br>Jackson, David; Cromsource<br>Lacouture, Mario E.; Mem Sloan Kettering Canc Ctr<br>Ratti, Emiliangelo; Takeda Pharmaceuticals Company<br>Tonini, Giuseppe; Università Campus Bio-Medico di Roma, Medical Oncology<br>Wood, Andrew; Idfac Ltd<br>Ständer, Sonja; University Hospital Münster, Dermatology |
| <b>Primary Subject Heading</b>: | Dermatology                                                                                                                                                                                                                                                                                                                                                                                                                                                                                                                                                                                                        |
| Secondary Subject Heading:      | Oncology, Pharmacology and therapeutics                                                                                                                                                                                                                                                                                                                                                                                                                                                                                                                                                                            |
| Keywords:                       | EGFR Inhibitor, neurokinin-1 antagonist, orvepitant, pruritus                                                                                                                                                                                                                                                                                                                                                                                                                                                                                                                                                      |
|                                 |                                                                                                                                                                                                                                                                                                                                                                                                                                                                                                                                                                                                                    |

SCHOLARONE™  
Manuscripts



I, the Submitting Author has the right to grant and does grant on behalf of all authors of the Work (as defined in the below author licence), an exclusive licence and/or a non-exclusive licence for contributions from authors who are: i) UK Crown employees; ii) where BMJ has agreed a CC-BY licence shall apply, and/or iii) in accordance with the terms applicable for US Federal Government officers or employees acting as part of their official duties; on a worldwide, perpetual, irrevocable, royalty-free basis to BMJ Publishing Group Ltd ("BMJ") its licensees and where the relevant Journal is co-owned by BMJ to the co-owners of the Journal, to publish the Work in this journal and any other BMJ products and to exploit all rights, as set out in our [licence](#).

The Submitting Author accepts and understands that any supply made under these terms is made by BMJ to the Submitting Author unless you are acting as an employee on behalf of your employer or a postgraduate student of an affiliated institution which is paying any applicable article publishing charge ("APC") for Open Access articles. Where the Submitting Author wishes to make the Work available on an Open Access basis (and intends to pay the relevant APC), the terms of reuse of such Open Access shall be governed by a Creative Commons licence – details of these licences and which [Creative Commons](#) licence will apply to this Work are set out in our licence referred to above.

Other than as permitted in any relevant BMJ Author's Self Archiving Policies, I confirm this Work has not been accepted for publication elsewhere, is not being considered for publication elsewhere and does not duplicate material already published. I confirm all authors consent to publication of this Work and authorise the granting of this licence.

**TITLE:** The neurokinin-1 antagonist orvepitant for EGFR-induced pruritus in cancer patients: a randomised, placebo-controlled, phase II trial

**AUTHORS:** Bruno Vincenzi<sup>1\*</sup> (0000-0001-8222-9025), Mike Trower<sup>2\*</sup> (0000-0003-0412-5719), Ajay Duggal<sup>3</sup> (0000-0003-3294-616X), Pamela Guglielmini<sup>4</sup> (0000-0003-3612-7786), Peter Harris<sup>2</sup> (0000-0002-8374-3859), David Jackson<sup>5</sup> (0000-0002-4448-8648), Mario Lacouture<sup>6</sup> (0000-0002-4818-3710), Emiliangelo Ratti<sup>7\*\*</sup> (0000-0002-7352-4695), Giuseppe Tonini<sup>1</sup> (0000-0003-4442-8677), Andrew Wood<sup>8</sup> (0000-0001-7536-6398), Sonja Ständer<sup>9</sup> (0000-0003-3612-7786)

**AFFILIATIONS:**

<sup>1</sup>Medical Oncology, Università Campus Bio-Medico di Roma, Rome, Italy

<sup>2</sup>NeRRe Therapeutics Ltd, Stevenage, UK

<sup>3</sup>Adnovate Clinical Development Strategies Ltd, East Sussex, UK

<sup>4</sup>A.S.O. S.S. Antonio e Biagio e C. Arrigo, Alessandria, Italy

<sup>5</sup>Cromsource, Stirling, UK

<sup>6</sup>Memorial Sloan Kettering Cancer Center, New York, US

<sup>7</sup>Takeda Pharmaceuticals Company, Boston, US

<sup>8</sup>Idfac Ltd, Devon, UK

<sup>9</sup>Center for Chronic Pruritus, University Hospital Münster, Münster, Germany

\*Dr Vincenzi and Dr Trower contributed equally to this work.

\*\*Current affiliation for E. Ratti

**CORRESPONDING AUTHOR:** Prof Dr Sonja Ständer

**Address:** Center for Chronic Pruritus, University Hospital Münster, Von-Esmarch-Strasse 58, D-48149 Münster, Germany

**Phone:** +49 251 8357470

**Email:** Sonja.Staender@ukmuenster.de

**WORD COUNT:** 3845 words

## ABSTRACT

**Objective** To evaluate the efficacy of orvepitant (10 or 30 mg given once daily, orally for 4 weeks), a neurokinin-1 receptor antagonist, compared with placebo in reducing the intensity of epidermal growth factor receptor inhibitor (EGFRI)-induced intense pruritus

**Design** Randomised, double-blind, placebo-controlled clinical trial

**Setting** 15 hospitals in Italy and 5 hospitals in the United Kingdom

**Participants** 44 patients aged  $\geq 18$  years receiving an EGFRI for a histologically confirmed malignant solid tumour and experiencing moderate or intense pruritus after EGFRI treatment

**Intervention** 30 mg or 10 mg orvepitant or placebo tablets once daily for 4 weeks (randomised 1:1:1)

**Primary and secondary outcome measures** The primary endpoint was change from Baseline in mean patient-recorded numerical rating scale (NRS) score (over the last 3 recordings) at Week 4. Secondary outcome measures were NRS score, verbal rating scale score, Skindex-16, and Leeds Sleep Evaluation Questionnaire at each study visit (Baseline, Weeks 1, 4, 8); rescue medication use; EGFRI dose reduction; and study withdrawal because of intense uncontrolled pruritus.

**Results** The trial was terminated early because of recruitment challenges; only 44 of the planned 90 patients were randomised. All patients were analysed for efficacy and safety. Mean NRS score change from Baseline to Week 4 was -2.78 (SD: 2.64) points in the 30 mg group, -3.04 (SD: 3.06) points in the 10 mg group, and -3.21 (SD: 1.77) points in the placebo group; the difference between orvepitant and placebo was not statistically significant. No safety signal was detected. Adverse events related to orvepitant (asthenia, dizziness, dry mouth, hyperhidrosis) were all of mild or moderate severity.

**Conclusions** Orvepitant was safe and well tolerated. No difference in NRS score between the orvepitant and placebo groups was observed at the Week 4 primary endpoint. A number of explanations for this outcome are possible.

**Trial registration number** EudraCT 2013-002763-25

**KEY WORDS:** pruritus, EGFR inhibitor, neurokinin-1 antagonist, orvepitant

### STRENGTHS AND LIMITATIONS OF THIS STUDY

- ▶ The RELIEVE 1 study was the first randomised, double-blind, placebo-controlled study of a neurokinin-1 antagonist for EGFRI-induced pruritus.
- ▶ Patients reported scores for the primary endpoint of reduction of itch intensity on a daily basis using an interactive voice response system.
- ▶ Effects on sleep and quality of life were also measured.
- ▶ Itch is a subjective symptom and thus susceptible to a placebo effect.
- ▶ The enrolment target was not reached because of recruitment problems in the target population.

## INTRODUCTION

While targeted biological therapies have increased patient survival for several tumour types, they are linked with a variety of adverse events (AEs), particularly dermatological AEs, including acneiform rash, hair changes, mucositis, xerosis/fissures, paronychia, and pruritus. Epidermal growth factor receptor inhibitors (EGFRIs) specifically are associated with these dermatological AEs that can require dose modification or treatment interruptions and thus interfere with these potentially life-prolonging therapies.<sup>1-5</sup> Rash, xerosis, and pruritus have the greatest impact on patient quality of life.<sup>5-7</sup> Pruritus incidence reported in clinical trials of anti-EGFR monoclonal antibodies (mAbs) and small-molecule EGFRIs ranges from 8% to 69% depending on the agent involved.<sup>8-9</sup> EGFRi-induced pruritus may be underreported or incompletely reported in clinical studies.<sup>10</sup> In a survey of cancer patients and survivors, pruritus is common and debilitating.<sup>11,12</sup> Lacouture et al. reported that pruritus occurs in approximately half of all patients treated with EGFRIs.<sup>4</sup> Finally, in a review of interviews conducted with 100 patients taking mainly EGFR mAbs, 72% of patients reported experiencing pruritus.<sup>13</sup> A safe and effective cancer-supportive care therapy to ameliorate the itching burden these patients experience is urgently needed.

Neurokinin-1 (NK1) receptors are 7-transmembrane receptors with a preferred peptide agonist ligand of substance P (SP).<sup>14</sup> SP produced by peripheral skin sensory nerve fibres is thought to promote itching via activation of NK1 receptors on keratinocytes and mast cells causing local inflammatory and vasodilatory effects.<sup>15</sup> Interestingly, Gerber et al. reported that mast cells significantly accumulate in the lesional skin of patients treated with EGFRIs and suggested that the antipruritic activity of the NK1 receptor antagonist aprepitant in this population is achieved by blocking the activation of mast cell NK1 receptors by SP, thereby preventing the release of mast cell histamine and other proinflammatory/pruritogenic mediators.<sup>16-18</sup> Recently another receptor, the Mas-related G-protein coupled receptor member X2 (MrgprX2), has been shown to be activated in humans by SP, and this interaction may contribute additionally to the proinflammatory effects mediated by mast cell degranulation.<sup>19</sup> SP and the NK1 receptor are also widely expressed centrally and have a role in transmission of the peripheral itch signal via the spinal superficial dorsal horn to higher brain centres for processing.<sup>20</sup> In rodents scratching behaviour can be blocked by neurotoxic destruction of spinal NK1 receptor-expressing neurons,<sup>21,22</sup> and *Tac1* (the gene encoding SP)-expressing spinal neurons has also been linked to the promotion of scratching behaviour.<sup>23</sup> Intradermal injection of SP in humans causes pruritus, erythema, and oedema.<sup>24-26</sup> Scratching behaviour induced by intradermal injection of either SP or a NK1 agonist or topical administration of a hapten in animals can all be profoundly reduced by NK1 antagonist treatment, including both orvepitant and aprepitant.<sup>27-30</sup> These data suggest that the NK1 receptor system is involved in itch signalling and therefore blockade of these pathways with NK1 receptor antagonists represents a potentially promising therapy for pruritic conditions, including EGFRi-induced pruritus.<sup>31,32</sup>

Aprepitant (Emend<sup>®</sup>, formerly MK-869) is the first commercially available drug of a new class of NK1 receptor antagonists for the prevention of chemotherapy-induced and postoperative nausea and vomiting. It has been evaluated in numerous open-label clinical studies of patients suffering from treatment-refractory pruritus, including a large number of patients suffering with acute EGFRi-induced pruritus.<sup>33-49</sup> In these uncontrolled studies, aprepitant acted as a rapid and highly effective antipruritic medication that also significantly improved patients' quality of life, leading to advocacy for clinical assessment of aprepitant and other emerging NK1 receptor antagonists in patients receiving agents with a high risk of pruritus.<sup>50</sup>

Like aprepitant, orvepitant is an orally active, potent, brain-penetrant, and selective non-surmountable NK1 antagonist that blocks SP signalling.<sup>51-53</sup> These compounds are active in the well characterised NK1 receptor pharmacodynamic gerbil foot-tapping model, in preclinical models of anxiety,<sup>51-54</sup> and, as reported above, in the gerbil scratching behaviour model.<sup>28,29</sup> In humans both compounds have pharmacokinetic properties consistent with once-daily oral dosing sufficient to achieve therapeutic plasma exposures that have high levels of central NK1 receptor occupancy.<sup>55,56</sup> Thus, orvepitant would be expected to achieve antipruritic efficacy similar to that of aprepitant in patients suffering from intense itch as a result of EGFRi treatment. The RELIEVE 1 study evaluating

1  
2  
3 the efficacy and safety of orvepitant is the first randomised, double-blind, placebo-controlled study of an NK1  
4 antagonist for EGFR-induced pruritus.  
5

## 6 **METHODS**

### 8 **Patient and public involvement**

9  
10 There was no patient or public involvement in the planning of this trial.  
11

### 12 **Study design and enrolment**

13  
14 The primary objective of this exploratory Phase 2, multicentre, randomised, double-blind, placebo-controlled  
15 clinical trial was to evaluate the efficacy of orvepitant compared with placebo in reducing the intensity of intense  
16 EGFR-induced pruritus. Pruritus intensity was measured primarily by change from Baseline in patient-recorded  
17 numerical rating scale (NRS) score ranging from 0 (no itch) to 10 (worst itch imaginable) points. On the basis of an  
18 assumed between-patient standard deviation (SD) of 2 points,<sup>8</sup> 23 patients per treatment arm were required to  
19 provide 80% power for a 2-sided 5% significance level hypothesis test to achieve a significant result when the true  
20 difference is at least 2 points. It was thus planned to enrol 30 patients per arm (90 total). After 20 months of  
21 recruitment, this target was far from being reached, and a blinded analysis of data variance showing between-patient  
22 SD of 2.6 points indicated that it was highly unlikely that a statistically robust assessment of benefit could be made  
23 even if enrolment were completed. The sponsor decided to terminate enrolment. However, the study data for all  
24 enrolled patients were analysed.  
25

### 27 **Patients and treatments**

28  
29 Patients were enrolled at 15 hospitals in Italy and 5 hospitals in the United Kingdom between 13 November 2013  
30 and 11 May 2015. Key eligibility criteria were age 18 years and older, monotherapy with an EGFR (including  
31 cetuximab, panitumumab, erlotinib, gefitinib, lapatinib, and afatinib) for a histologically confirmed malignant solid  
32 tumour, moderate or intense pruritus after treatment with the EGFR (defined as the mean of between 2 and 7 daily  
33 patient-reported average pruritus intensity NRS scores initially  $\geq 7$  and subsequently changed in April 2014 to  $\geq 5$   
34 to improve study recruitment), pruritus treatment within the previous 3 months, and no use of aprepitant or  
35 fosaprepitant in the previous 4 weeks. The investigators randomised eligible patients according to a central  
36 randomisation code generated by the sponsor using an interactive voice response system (IVRS). The patients were  
37 assigned in a 1:1:1 ratio to receive 30 mg orvepitant, 10 mg orvepitant, or placebo tablets once daily (in the evening  
38 before bedtime) for 4 weeks. Randomisation was stratified by investigational site; block size was 6. Placebo tablets  
39 were identical in appearance to orvepitant tablets.  
40

### 42 **Assessments**

43  
44 Patients were followed-up for 4 weeks after treatment was completed or discontinued. Patients reported their NRS  
45 scores daily using an IVRS between Baseline and Week 8. At each study visit (Baseline, Week 1, Week 4, Week 8)  
46 an NRS score and a verbal rating scale (VRS) score were recorded. The VRS score was assigned in response to the  
47 following questions: How intense was your pruritus during the past 24 hours? Did you have no pruritus, weak  
48 pruritus, moderate pruritus, severe pruritus, or very severe pruritus? Scores ranged from 0 (no pruritus) to 4 (very  
49 severe pruritus). Both the NRS and VRS are validated instruments for the measurement of pruritus intensity.<sup>57</sup> At  
50 each study visit, the patients also completed the Skindex-16 (an instrument to measure the effects of skin disease on  
51 health-related quality of life),<sup>58</sup> and the Leeds Sleep Evaluation Questionnaire (LSEQ; a 10-item instrument to  
52 assess changes in sleep quality over the course of an intervention). Safety was assessed by physical examination  
53 (including Eastern Cooperative Oncology Group [ECOG] status) and 12-lead electrocardiogram (ECG) at Baseline  
54 and Week 8, vital signs and laboratory tests (haematology, serum biochemistry, urinalysis) at each visit, and  
55 recording of AEs throughout the study. AEs were graded and categorised according to the National Cancer  
56  
57

Institute's Common Terminology Criteria for Adverse Events (CTCAE). Use of concomitant medications, including EGFRIs and any rescue medication, was recorded throughout the study. Sparse pharmacokinetic sampling was conducted to allow for exploratory analysis of the correlation of orvepitant plasma levels with clinical efficacy and secondary assessment scores.

## Endpoints

The primary endpoint was change from Baseline in mean patient-recorded NRS score (over the last 3 recordings) at Week 4. Secondary endpoints were also evaluated: change from Baseline in mean patient-recorded NRS score (last 3 recordings) each week; change from Baseline in mean patient-recorded NRS score (all values in the week) at Weeks 1, 4, 8; change from Baseline in patient-recorded NRS score at Days 2, 3, 4, 5, 6, 7, 8; change from Week 4 in patient-recorded NRS score (over the last 3 recordings) at Weeks 5, 6, 7, 8; change from Week 4 in VRS score at Week 8; change from Baseline in Skindex-16 quality of life at Weeks, 1, 4, 8; change from Baseline in LSEQ at Weeks, 1, 4, 8; rescue medication use; EGFRi dose reduction; and study withdrawal because of intense uncontrolled pruritus.

## Statistical analysis

Efficacy endpoints were analysed in the modified intention-to-treat (mITT) population of all randomised patients who had received at least the first dose of study medication and had at least 1 post-treatment efficacy assessment. The primary endpoint was analysed by mixed-model repeated measures analysis with the primary inference being the change from Baseline in patient-reported NRS scores averaged across the last 3 values of the fourth week of dosing fitted as the response variable in the mixed model. The model included treatment group, study pooled site, study visit, the interaction between study visit and treatment group, the covariate (the baseline value of the variable being analysed) and the interaction between baseline covariate and visit. The 3 treatment groups were analysed together in one model. Point estimates and corresponding 95% confidence intervals were constructed for the difference between each dose of orvepitant and placebo for each week. The primary efficacy endpoint was tested at a 5% level of significance using a two-sided test to test orvepitant 30 mg versus placebo, and no adjustment for multiple comparisons was made for the patient-recorded NRS score orvepitant 10 mg versus placebo test or the secondary and exploratory endpoints. Safety was analysed in the safety population of all patients who received a dose of study medication using descriptive statistics.

## RESULTS

### Patients

A total of 44 patients were randomised and treated: 16 to orvepitant 30 mg, 14 to orvepitant 10 mg, and 14 to placebo. Nine patients discontinued the study (Figure 1). All patients were Caucasian, and 26 (59%) were male and 18 (41%) female. Median age was 68 years (range: 35 to 83 years), and 32 (73%) patients were aged 65 or older. Mean baseline NRS score ranged from 5.88 (SD: 0.93) in the placebo group to 6.68 (SD: 1.28) in the 30 mg orvepitant group. At Baseline, most patients had moderate to severe pruritus, and the most common locations were the head (specifically the scalp 26 [59%] patients) and the trunk (11 [25%]). Baseline assessments of acneiform rash and maculopapular rash showed a similar pattern (Table 1).

**Table 1. Demographic and baseline characteristics**

| Characteristic                 | Orvepitant 30 mg<br>N = 16 | Orvepitant 10 mg<br>N = 14 | Placebo<br>N = 14 | Total<br>N = 44 |
|--------------------------------|----------------------------|----------------------------|-------------------|-----------------|
| Age (years),<br>median (range) | 69.0 (43, 83)              | 73.5 (49, 81)              | 67.0 (35, 76)     | 68.0 (35, 83)   |

|                                                      |                 |                  |                 |               |
|------------------------------------------------------|-----------------|------------------|-----------------|---------------|
| Age groups, n (%)                                    |                 |                  |                 |               |
| < 65 years                                           | 4 (25.0)        | 4 (28.6)         | 4 (28.6)        | 12 (27.3)     |
| ≥ 65 years                                           | 12 (75.0)       | 10 (71.4)        | 10 (71.4)       | 32 (72.7)     |
| Gender, n (%)                                        |                 |                  |                 |               |
| Female                                               | 5 (31.3)        | 5 (35.7)         | 8 (57.1)        | 18 (40.9)     |
| Male                                                 | 11 (68.8)       | 9 (64.3)         | 6 (42.9)        | 26 (59.1)     |
| Race, n (%)                                          |                 |                  |                 |               |
| Caucasian                                            | 16 (100.0)      | 14 (100.0)       | 14 (100.0)      | 44 (100.0)    |
| Time since cancer diagnosis (months), median (range) | 17.5 (1, 131)   | 29.7 (12, 129)   | 20.8 (5, 60)    | 23.0 (1, 131) |
| Patient-reported NRS score                           |                 |                  |                 |               |
| Mean (SD)                                            | 6.68 (1.278)    | 6.95 (1.4.13)    | 5.88 (0.930)    | NC            |
| Median (range)                                       | 6.86 (4.8, 9.3) | 7.00 (5.0, 10.0) | 5.57 (5.0, 7.4) | NC            |
| <b>PRURITUS</b>                                      |                 |                  |                 |               |
| CTCAE grade, n (%)                                   |                 |                  |                 |               |
| Grade 1                                              | 2 (12.5)        | 0                | 0               | 2 (4.5)       |
| Grade 2                                              | 8 (50.0)        | 9 (64.3)         | 11 (78.6)       | 28 (63.6)     |
| Grade 3                                              | 5 (31.3)        | 5 (35.7)         | 3 (21.4)        | 13 (29.5)     |
| Unknown                                              | 1 (6.3)         | 0                | 0               | 1 (2.3)       |
| Location, n (%)                                      |                 |                  |                 |               |
| Head                                                 | 8 (50.0)        | 6 (42.9)         | 12 (85.7)       | 26 (59.1)     |
| Trunk                                                | 7 (43.8)        | 3 (21.4)         | 1 (7.1)         | 11 (25.0)     |
| Arms                                                 | 0               | 3 (21.4)         | 0               | 3 (6.8)       |
| Legs                                                 | 0               | 2 (14.3)         | 1 (7.1)         | 3 (6.8)       |
| Unknown                                              | 1 (6.3)         | 0                | 0               | 1 (2.3)       |
| <b>ACNEIFORM RASH</b>                                |                 |                  |                 |               |
| CTCAE grade, n (%)                                   |                 |                  |                 |               |
| Grade 1                                              | 2 (12.5)        | 3 (21.4)         | 2 (14.3)        | 7 (15.9)      |
| Grade 2                                              | 7 (43.8)        | 7 (50.0)         | 10 (71.4)       | 24 (54.5)     |
| Grade 3                                              | 6 (37.5)        | 3 (21.4)         | 1 (7.1)         | 10 (22.7)     |
| Unknown                                              | 1 (6.3)         | 1 (7.1)          | 1 (7.1)         | 3 (6.8)       |
| Location, n (%)                                      |                 |                  |                 |               |
| Head                                                 | 7 (43.8)        | 5 (35.7)         | 11 (78.6)       | 23 (52.3)     |
| Trunk                                                | 7 (43.8)        | 5 (35.7)         | 0               | 12 (27.3)     |
| Arms                                                 | 1 (6.3)         | 3 (21.4)         | 1 (7.1)         | 5 (11.4)      |
| Legs                                                 | 0               | 0                | 1 (7.1)         | 1 (2.3)       |
| Unknown                                              | 1 (6.3)         | 1 (7.1)          | 1 (7.1)         | 3 (6.8)       |
| <b>MACULOPAPULAR RASH</b>                            |                 |                  |                 |               |
| CTCAE grade, n (%)                                   |                 |                  |                 |               |
| Grade 1                                              | 3 (18.8)        | 5 (35.7)         | 5 (35.7)        | 13 (29.5)     |
| Grade 2                                              | 8 (50.0)        | 5 (35.7)         | 8 (57.1)        | 21 (47.7)     |
| Grade 3                                              | 4 (25.0)        | 3 (21.4)         | 0               | 7 (15.9)      |
| Unknown                                              | 1 (6.3)         | 1 (7.1)          | 1 (7.1)         | 3 (6.8)       |
| Location, n (%)                                      |                 |                  |                 |               |



|         |          |          |           |           |
|---------|----------|----------|-----------|-----------|
| Head    | 7 (43.8) | 5 (35.7) | 12 (85.7) | 24 (54.5) |
| Trunk   | 7 (43.8) | 4 (28.6) | 0         | 11 (25.0) |
| Arms    | 1 (6.3)  | 4 (28.6) | 0         | 5 (11.4)  |
| Legs    | 0        | 0        | 1 (7.1)   | 1 (2.3)   |
| Unknown | 1 (6.3)  | 1 (7.1)  | 1 (7.1)   | 3 (6.8)   |

CTCAE = Common Terminology Criteria for Adverse Events; NC = not calculated; NRS = numerical rating scale; SD = standard deviation.

The median dose number was 28 (range: 1 to 35) in the 30 mg group, 28 (range: 1 to 35) in the 10 mg group, and 29 (range: 28 to 39) in the placebo group. Five (11%) patients (all in the orvepitant groups) took the study drug for 1 week or less; 18 (41%) patients took the study drug (orvepitant or placebo) for 1 to 4 weeks, and 21 (48%) took the study drug for >4 weeks (maximum: 39 days).

All 44 patients were included in the mITT and safety populations and analysed according to the randomised treatment.

### Efficacy

Patient compliance with daily reporting of NRS score was high; mean compliance rate was 92%, and median compliance rate was 100%. At Week 4, 38 subjects remained in the study. NRS score decreased from Baseline to Week 4 in all 3 groups (Table 2). The difference between orvepitant and placebo was not, however, statistically significant (30 mg group:  $P = 0.12$ , 10 mg group:  $P = 0.19$ ).

**Table 2. Change from Baseline in patient-reported numerical reporting scale scores at Week 4**

| Statistic                                 | Orvepitant 30 mg<br><i>N</i> = 16 | Orvepitant 10 mg<br><i>N</i> = 14 | Placebo<br><i>N</i> = 14 |
|-------------------------------------------|-----------------------------------|-----------------------------------|--------------------------|
| <b>n</b>                                  | <b>13</b>                         | <b>11</b>                         | <b>14</b>                |
| Mean (SD)                                 | -2.78 (2.64)                      | -3.04 (3.06)                      | -3.21 (1.77)             |
| Median                                    | -2.75                             | -2.00                             | -2.50                    |
| Minimum, maximum                          | -6.3, 3.0                         | -8.3, 1.1                         | -6.3, 0.0                |
| LSMEANS estimate (95% CI)                 | -2.40 (-3.54, -1.27)              | -2.53 (-3.80, -1.27)              | -3.70 (-4.88, -2.52)     |
| LSMEANS standard error                    | 0.56                              | 0.62                              | 0.58                     |
| Orvepitant vs placebo difference (95% CI) | 1.30 (-0.35, 2.95)                | 1.17 (-0.62, 2.96)                |                          |
| <i>P</i> value                            | 0.120                             | 0.194                             |                          |

CI = confidence interval; LSMEANS = least-squares means; SD = standard deviation.

Note: Analysis results from mixed-model repeated measures analysis (Week 1 to Week 4) of the 3 treatment groups analysed together in one model: Change from Baseline = Treatment + Pooled Site + Visit + Treatment\*Visit + Baseline Results + Visit\*Baseline Covariate Interaction

Secondary NRS and VRS endpoints reflected the results for the primary endpoint (Table 3). Change from Baseline in Skindex-16 and LSEQ score showed no difference between the treatment groups at any time point. Rescue medication use and EGFR dose reduction both occurred in 7 (16%) patients (3 in the orvepitant 30 mg group and 2

each in the orvepitant 10 mg and placebo groups). No subjects withdrew from the study because of intense uncontrolled pruritus.

**Table 3. Summary of secondary efficacy endpoints**

| Statistic                                                | Orvepitant 30 mg<br>N = 16 | Orvepitant 10 mg<br>N = 14 | Placebo<br>N = 14   |
|----------------------------------------------------------|----------------------------|----------------------------|---------------------|
| <b>Change from Baseline, (n) Mean (SD)</b>               |                            |                            |                     |
| Patient-recorded NRS score (last 3 recordings) at Week 1 | (16) -1.18 (1.55)          | (13) -1.66 (2.48)          | (14) -1.16 (1.41)   |
| Patient-recorded NRS score (last 3 recordings) at Week 2 | (14) -2.33 (2.00)          | (13) -2.85 (3.43)          | (13) -2.76 (1.96)   |
| Patient-recorded NRS score (last 3 recordings) at Week 3 | (14) -2.16 (2.56)          | (11) -3.14 (2.77)          | (14) -3.26 (2.00)   |
| Patient-recorded NRS score (last 3 recordings) at Week 5 | (13) -3.19 (2.88)          | (10) -3.32 (3.19)          | (14) -3.90 (2.19)   |
| Patient-recorded NRS score (last 3 recordings) at Week 6 | (13) -3.24 (2.89)          | (10) -3.68 (2.55)          | (13) -4.00 (1.78)   |
| Patient-recorded NRS score (last 3 recordings) at Week 7 | (12) -2.49 (2.91)          | (10) -2.85 (2.52)          | (12) -4.13 (2.33)   |
| Patient-recorded NRS score (last 3 recordings) at Week 8 | (11) -2.86 (2.91)          | (10) -3.18 (2.68)          | (12) -4.32 (2.27)   |
|                                                          |                            |                            |                     |
| Patient-recorded NRS score (all week) at Week 1          | (16) -0.96 (1.09)          | (13) -1.34 (1.93)          | (14) -0.86 (1.00)   |
| Patient-recorded NRS score (all week) at Week 4          | (13) -2.64 (2.61)          | (11) -3.05 (3.00)          | (14) -3.20 (1.96)   |
| Patient-recorded NRS score (all week) at Week 8          | (11) -2.65 (2.81)          | (10) -3.15 (2.66)          | (12) -4.29 (2.33)   |
|                                                          |                            |                            |                     |
| Clinic-visit NRS score at Week 1                         | (14) -1.93 (1.73)          | (14) -2.21 (3.19)          | (14) -3.00 (2.60)   |
| Clinic-visit NRS score at Week 4                         | (13) -3.38 (2.69)          | (11) -4.27 (2.94)          | (14) -4.14 (2.18)   |
| Clinic-visit NRS score at Week 8                         | (13) -3.50 (2.71)          | (11) -3.91 (2.66)          | (12) -3.92 (2.35)   |
|                                                          |                            |                            |                     |
| Patient-recorded NRS score at Day 2                      | (16) -0.61 (1.29)          | (12) -0.84 (1.24)          | (13) -0.33 (0.74)   |
| Patient-recorded NRS score at Day 3                      | (14) -0.96 (0.99)          | (11) -0.86 (1.64)          | (13) -0.41 (0.65)   |
| Patient-recorded NRS score at Day 4                      | (14) -0.85 (1.09)          | (12) -1.04 (1.88)          | (14) -0.81 (1.28)   |
| Patient-recorded NRS score at Day 5                      | (13) -1.35 (1.12)          | (12) -1.29 (2.23)          | (13) -1.18 (1.45)   |
| Patient-recorded NRS score at Day 6                      | (14) -1.28 (1.68)          | (11) -1.31 (2.20)          | (11) -1.30 (1.54)   |
| Patient-recorded NRS score at Day 7                      | (14) -1.42 (2.30)          | (12) -1.87 (3.63)          | (13) -1.33 (1.89)   |
| Patient-recorded NRS score at Day 8                      | (14) -1.85 (2.31)          | (11) -1.83 (2.42)          | (14) -1.88 (2.03)   |
|                                                          |                            |                            |                     |
| Skindex-16 at Week 1: Symptoms                           | (14) -12.56 (22.25)        | (13) 1.24 (25.05)          | (13) -2.88 (18.50)  |
| Skindex-16 at Week 4: Symptoms                           | (13) -8.29 (25.06)         | (11) -9.09 (36.94)         | (13) -7.69 (29.56)  |
| Skindex-16 at Week 8: Symptoms                           | (12) -8.09 (23.60)         | (11) -8.71 (36.19)         | (12) -4.02 (33.30)  |
| Skindex-16 at Week 1: Emotions                           | (14) -44.73 (16.35)        | (13) -21.52 (27.80)        | (13) -21.29 (18.20) |
| Skindex-16 at Week 4: Emotions                           | (13) -32.60 (24.96)        | (11) -31.96 (36.34)        | (13) -25.69 (26.54) |
| Skindex-16 at Week 8: Emotions                           | (12) -35.37 (30.88)        | (11) -37.23 (28.13)        | (12) -36.86 (26.32) |
| Skindex-16 at Week 1: Functioning                        | (14) -13.33 (16.69)        | (13) -12.05 (29.08)        | (13) -1.28 (13.51)  |
| Skindex-16 at Week 4: Functioning                        | (13) 2.05 (26.51)          | (11) -11.51 (36.07)        | (13) -1.80 (20.40)  |
| Skindex-16 at Week 8: Functioning                        | (12) -0.83 (28.04)         | (11) -22.73 (25.64)        | (12) -5.00 (16.17)  |
|                                                          |                            |                            |                     |
| LSEQ at Week 1: Getting to sleep                         | (13) -12.08 (22.10)        | (12) -9.82 (23.50)         | (12) -6.45 (16.97)  |
| LSEQ at Week 4: Getting to sleep                         | (12) -12.36 (19.61)        | (9) 3.37 (23.64)           | (12) -8.47 (18.19)  |

|                                                                                                                                                                                    |                    |                     |                     |
|------------------------------------------------------------------------------------------------------------------------------------------------------------------------------------|--------------------|---------------------|---------------------|
| LSEQ at Week 8: Getting to sleep                                                                                                                                                   | (11) -4.57 (13.67) | (9) 2.04 (25.47)    | (11) -7.06 (23.68)  |
| LSEQ at Week 1: Quality of sleep                                                                                                                                                   | (13) -6.77 (26.98) | (12) -13.29 (33.39) | (12) -5.67 (15.39)  |
| LSEQ at Week 4: Quality of sleep                                                                                                                                                   | (12) -6.46 (20.63) | (9) -8.61 (39.09)   | (12) -9.13 (17.60)  |
| LSEQ at Week 8: Quality of sleep                                                                                                                                                   | (11) -6.73 (21.81) | (9) -17.22 (34.00)  | (11) -10.14 (26.73) |
| LSEQ at Week 1: Awake following sleep                                                                                                                                              | (13) 5.85 (19.80)  | (12) -12.08 (32.39) | (12) -2.04 (15.50)  |
| LSEQ at Week 4: Awake following sleep                                                                                                                                              | (12) 8.29 (16.22)  | (8) -8.00 (43.83)   | (12) -4.13 (19.93)  |
| LSEQ at Week 8: Awake following sleep                                                                                                                                              | (11) 7.23 (16.91)  | (9) -10.72 (36.14)  | (11) -7.55 (30.06)  |
| LSEQ at Week 1: Behaviour following wakening                                                                                                                                       | (13) 3.90 (12.44)  | (12) -3.89 (32.06)  | (12) -3.67 (7.67)   |
| LSEQ at Week 4: Behaviour following wakening                                                                                                                                       | (12) 1.03 (15.97)  | (9) 5.78 (46.41)    | (12) -9.89 (14.53)  |
| LSEQ at Week 8: Behaviour following wakening                                                                                                                                       | (11) -0.36 (13.73) | (9) 6.82 (49.17)    | (11) -1.82 (19.95)  |
| <b>Change from Baseline, n (%)</b>                                                                                                                                                 |                    |                     |                     |
| VRS score at Week 1                                                                                                                                                                |                    |                     |                     |
| Improved                                                                                                                                                                           | 8 (57.1)           | 9 (64.3)            | 9 (64.3)            |
| No change                                                                                                                                                                          | 5 (35.7)           | 3 (21.4)            | 4 (28.6)            |
| Worsened                                                                                                                                                                           | 1 (7.1)            | 2 (14.3)            | 1 (7.1)             |
| VRS score at Week 4                                                                                                                                                                |                    |                     |                     |
| Improved                                                                                                                                                                           | 10 (76.9)          | 8 (80.0)            | 11 (78.6)           |
| No change                                                                                                                                                                          | 3 (23.1)           | 2 (20.0)            | 2 (14.3)            |
| Worsened                                                                                                                                                                           | 0                  | 0                   | 1 (7.1)             |
| VRS score at Week 8                                                                                                                                                                |                    |                     |                     |
| Improved                                                                                                                                                                           | 9 (75.0)           | 9 (81.8)            | 9 (81.8)            |
| No change                                                                                                                                                                          | 3 (25.0)           | 2 (18.2)            | 2 (18.2)            |
| Worsened                                                                                                                                                                           | 0                  | 0                   | 0                   |
| <b>Change from Week 4, (n) Mean (SD)</b>                                                                                                                                           |                    |                     |                     |
| Patient-recorded NRS score (last 3 recordings) at Week 5                                                                                                                           | (13) -0.41 (1.409) | (10) -0.47 (1.989)  | (14) -0.69 (0.991)  |
| Patient-recorded NRS score (last 3 recordings) at Week 6                                                                                                                           | (13) -0.46 (1.561) | (10) -0.83 (2.196)  | (13) -0.69 (0.897)  |
| Patient-recorded NRS score (last 3 recordings) at Week 7                                                                                                                           | (12) 0.17 (1.972)  | (10) 0.00 (3.604)   | (12) -0.72 (1.127)  |
| Patient-recorded NRS score (last 3 recordings) at Week 8                                                                                                                           | (11) -0.42 (2.071) | (10) -0.33 (3.728)  | (12) -0.92 (1.084)  |
| VRS score at Week 8                                                                                                                                                                |                    |                     |                     |
|                                                                                                                                                                                    | (12) -0.08 (1.730) | (11) 0.36 (3.501)   | (12) 0.08 (1.165)   |
| <b>Number of Subjects (%)</b>                                                                                                                                                      |                    |                     |                     |
| Prescribed rescue medication                                                                                                                                                       | 6 (37.5)           | 4 (28.6)            | 2 (14.3)            |
| Used rescue medication                                                                                                                                                             | 3 (18.8)           | 2 (14.3)            | 2 (14.3)            |
| EGFRI dose reduction                                                                                                                                                               | 3 (18.8)           | 2 (14.3)            | 2 (14.3)            |
| Withdrawal because of intense uncontrolled pruritus                                                                                                                                | 0                  | 0                   | 0                   |
| EGFRI = epidermal growth factor receptor inhibitor; LSEQ = Leeds Sleep Evaluation Questionnaire; NRS = numerical rating scale; SD = standard deviation; VRS = verbal rating scale. |                    |                     |                     |

Analyses of pharmacokinetic data were not conducted because of the lack of efficacy observed.

### Safety

No safety signal was detected. A total of 34 (77%) patients experienced a treatment-emergent AE, but no unexpected AEs were reported. Only 4 mild and moderate AEs were considered by investigators to be related to orvepitant (Table 4). AEs that occurred in >5% of patients were asthenia (8 [18%] patients), skin toxicity (7 [16%]

patients; term reported by the investigators was skin toxicity, which for EGFRIs commonly includes reactions such as skin rash, skin dryness [xerosis], pruritus, paronychia, hair abnormality, mucositis, and increased, growth of the eyelashes or facial hair<sup>59</sup>), diarrhoea (4 [9%] patients), cough (3 [7%] patients), rash (3 [7%] patients; terms as reported by the investigators included worsening of rash; hands, ankle and face rash; and rash cutaneous), and anaemia (3 [7%] patients). These more common AEs occurred in similar rates in the active and placebo groups except for anaemia and rash, which occurred infrequently and only in patients who received orvepitant. There was no apparent relationship between incidence or severity of AEs and orvepitant dose. No serious AEs were reported.

**Table 4. Drug-related adverse events**

|                     | <b>Orvepitant 30 mg</b><br><b>N = 16</b><br><b>n (%)</b> | <b>Orvepitant 10 mg</b><br><b>N = 14</b><br><b>n (%)</b> | <b>Placebo</b><br><b>N = 14</b><br><b>n (%)</b> |
|---------------------|----------------------------------------------------------|----------------------------------------------------------|-------------------------------------------------|
| Any drug-related AE | 3 (18.8)                                                 | 1 (7.1)                                                  | 0                                               |
| Mild AEs            |                                                          |                                                          |                                                 |
| Asthenia            | 1 (6.3)                                                  | 0                                                        | 0                                               |
| Dizziness           | 0                                                        | 1 (7.1)                                                  | 0                                               |
| Dry mouth           | 1 (6.3)                                                  | 0                                                        | 0                                               |
| Moderate AEs        |                                                          |                                                          |                                                 |
| Hyperhidrosis       | 1 (6.3)                                                  | 0                                                        | 0                                               |

No clinically significant changes in laboratory results, vital signs, physical examination findings, ECOG status, or ECG parameters were related to orvepitant.

## DISCUSSION

### Strengths and limitations of the study

The RELIEVE 1 study was the first randomised, double-blind, placebo-controlled study of an NK1 receptor antagonist for EGFRi-induced pruritus. The enrolment target was not reached because of recruitment problems in the critically ill target population. A similar response was seen in both placebo and active groups, a result for which there are several possible explanations. Nonetheless, this randomised, controlled study provided insights into the course, itch characteristics, and possible mechanisms of EGFRi-induced pruritus that may inform future studies.

### Interpretation of the results

Orvepitant appeared safe and well tolerated, and the findings in this study are consistent with the substantial safety database accumulated to date on this product in different populations. The safety profile exhibited allows further investigation of orvepitant in this or other indications, including a planned Phase 3 study in refractory or unexplained chronic cough following a successful Phase 2 study in this indication.<sup>60</sup>

The efficacy results were, however, inconclusive; no significant difference between the active groups and the placebo group was observed. Patients experienced a mean reduction in itching of approximately 3 NRS points in the 2 orvepitant groups and the placebo group. This outcome may, of course, have resulted from the premature termination of the study and the consequent substantially reduced sample size making it difficult to determine a treatment difference. However, given there was no indication of difference between the arms, it seems unlikely even if the study had been fully recruited that a treatment effect would have been detected. This outcome stands in stark contrast to the observation studies conducted with the NK1 antagonist aprepitant.<sup>33-49</sup> For example, in a 1-week, open-label study in 45 patients experiencing mainly EGFRi-induced severe pruritus, aprepitant therapy resulted in

1  
2  
3 median visual analogue scale itch scores falling from 8 at Baseline to 1 after 7 days in a refractory group resistant to  
4 standard anti-pruritus treatments and from 8 to 0 in a naive group ( $p < 0.0001$  in both groups).<sup>8</sup> In this trial 41 (91%)  
5 patients responded to aprepitant (i.e., had a  $>50\%$  reduction in pruritus intensity), and pruritus recurred in only 6  
6 (13%) patients. This difference is difficult to rationalise given that the pharmacology of orvepitant and aprepitant are  
7 so comparable and both can achieve exposures likely to be therapeutic in humans following oral dosing. However,  
8 one plausible explanation for the results in the RELIEVE 1 study is the placebo effect that is often seen in clinical  
9 trials with subjective endpoints such as pruritus intensity.<sup>61</sup> In this study, critically ill patients were receiving a  
10 modern antineoplastic therapy, and they may have had a particularly high expectation of the benefit of their EGFR  
11 therapy in general and of orvepitant's ability to reduce pruritus and thereby improve their quality of life.

12  
13  
14 A further explanation for the RELIEVE 1 study results relates to the pathological mechanism underlying the itch in  
15 these patients. EGFR-induced pruritus arises acutely within the first 2 weeks after initiation of the anticancer  
16 therapy<sup>5</sup> and cutaneous accumulation, and activation of dermal mast cells<sup>16,17,62</sup> may be the most important driver of  
17 the itch signalling in these patients. This acute course contrasts with that of chronic pruritus conditions (defined as  
18 being  $>6$  weeks in duration),<sup>63</sup> which are now linked to the sensitisation of itch signalling pathways similar to  
19 chronic pain, such that patients may report spontaneous itch (alloknesis) or an enhanced itch to normal itch-evoking  
20 stimuli (hyperknesis).<sup>32,64,65</sup> NK1 antagonists have shown great promise in randomised, placebo-controlled clinical  
21 studies as treatments for chronic pruritus conditions in general<sup>66,67</sup> as well as specifically for prurigo nodularis,<sup>68</sup>  
22 atopic dermatitis-associated pruritus,<sup>69</sup> and psoriasis-associated pruritus.<sup>70</sup> Orvepitant has shown efficacy against  
23 chronic refractory cough, which has also been recognised as a neural hypersensitivity syndrome.<sup>60</sup> Thus, NK1  
24 antagonists may lack efficacy in acute pruritic conditions driven by cutaneous mast cells, such as EGFR-induced  
25 pruritus, whilst being effective in chronic pruritus conditions by addressing itch pathway sensitisation.

26  
27  
28 A final explanation is that the improvement in itch scores seen in the 2 orvepitant groups and the placebo group may  
29 be attributable to the natural course of pruritus over the weeks following the initiation of EGFR treatment. It is now  
30 known that patterns of cutaneous toxicities with EGFR treatment can vary with time; for example, the intensity of  
31 acneiform rash that is associated with pruritus rises and falls dramatically in the first month.<sup>71</sup> If this were the case  
32 for itch intensity, it would be difficult to show a benefit against such a dynamic and self-limiting background.

### 33 34 **Implications for future studies**

35  
36 Recruitment for this study was stopped after 20 months when only 44 of the planned 90 subjects had been enrolled.  
37 Despite evidence in the literature of a high prevalence of EGFR-induced pruritus,<sup>1-11,13,50,72,73</sup> we experienced  
38 substantial difficulty identifying patients with severe enough pruritus (i.e., NRS score  $\geq 5$ ) to enable detection of  
39 post-treatment change. Study enrolment may have been limited by the fact that all investigators were oncologists,  
40 who are faced with multiple AEs in patients receiving EGFRs (e.g., diarrhoea, rash, asthenia, nausea and vomiting,  
41 conjunctivitis, mucositis) that may have taken precedence over pruritus, a purely subjective symptom that is not  
42 widely reported in the oncology community.<sup>10</sup> Patients may also have been unwilling to enter the study because  
43 pruritus is not a major priority for them compared to their cancer.

44  
45  
46 NK1 antagonists may still hold potential for treatment of skin toxicities experienced by cancer patients treated with  
47 EGFRs or other targeted therapies. However, future studies will require a more complete understanding of the  
48 epidemiology and course of target cancer therapy-induced pruritus to enable appropriate selection and sizing of the  
49 patient population to achieve statistical power and a design that minimises or quantifies the placebo effect.  
50 Furthermore, greater knowledge of the pathological mechanism underlying the pruritus in this condition is needed.  
51 Without these advances, the experience of this trial shows that further investigation of this particular drug-induced  
52 pruritus condition at the current juncture will prove challenging.

### 53 54 **FIGURE LEGENDS**

## Figure 1. Disposition of RELIEVE 1 patients

**Acknowledgements** We thank Anne McDonough, a professional medical writer who provided medical writing support funded by NeRRe Therapeutics Ltd.

**Contributors** Study concept and design: BV, MT, PH, ML, ER, GT, AW, SS; data acquisition: BV, PG; quality control of data and algorithms: PH, DJ; data analysis and interpretation: BV, MT, AD, SS; statistical analysis: DJ; manuscript preparation: MT; manuscript editing: BV, MT, SS. All authors read, edited, and approved the final manuscript.

**Funding** This work was supported and sponsored by NeRRe Therapeutics Ltd. The sponsor was involved in the study design; in the collection, analysis and interpretation of the data; in the writing of the report; and in the decision to submit the paper for publication. ML is funded in part through NIH/NCI Cancer Center Support Grant P30 CA008748.

**Competing interests** MT is a current employee and ER is a past employee of NeRRe Therapeutics Ltd, and both are inventors on a granted patent on novel uses of orvepitant. BV and PG received payment from NeRRe as investigators in this study. AD received payment from NeRRe for service as the Chief Medical Officer for this study. DJ is an employee of Cromsource, which received payment from NeRRe for statistical analysis of this study. PH has received payment from NeRRe as a consultant. ML reports receiving personal fees from Legacy Healthcare Services, AdgeroBio Pharmaceuticals, Amryt Pharma, Celldex Therapeutics, Debiopharm, Galderma Research and Development, Johnson & Johnson, Novocure, Lindi Skin, Merck Sharp and Dohme Corporation, Helsinn Healthcare SA, Janssen Research & Development LLC, Menlo Therapeutics, Novartis Pharmaceuticals Corporation, F. Hoffmann-La Roche AG, Abbvie Inc. Boehringer Ingelheim Pharma Gmbh & Co. KG, Allergan Inc, Amgen Inc, E.R. Squibb & Sons L.L.C., EMD Serono Inc, AstraZeneca Pharmaceuticals LP, Genentech Inc, Leo Pharma Inc, Seattle Genetics, Bayer, Männer SAS, Lutris Pharma, Pierre Fabre, Paxman Cooler Ltd, Adjucare, Dignitana, Biotechspert, Teva Pharmaceuticals Mexico, Parexel, OnQuality Pharmaceuticals Ltd, Novartis, Our Brain Bank, Millenium Pharmaceuticals and research funding from Berg Health, Bristol-Myers Squibb, Lutris Pharma, Novocure, Paxman, Biotest, and Veloce BioPharma. GT reports no conflicts of interest. AW reports receiving payment from NeRRe as Chair of the Advisory Board and from Advent Life Sciences for consultancy, Canbex Therapeutics as a nonexecutive director (past position), Calcico Therapeutics as chairman (past position) and a nonexecutive director (past position), and the Wellcome Trust as a member of grant committees. SS reports receiving payment from NeRRe as a member of the advisory board and from Almirall, Astellas Pharma, Beiersdorf, Celgene Corporation, Chugai Pharma, Creabilis, Daiichi Sankyo, Galderma, Helsinn, Kiniska Pharmaceuticals, Kneipp, Maruho Co, Merz Pharma, Novartis, Pierre Fabre Laboratories, Sienna Biopharmaceuticals, and Ziarco as a member of their advisory boards and from Menlo Therapeutics as an investigator and participation as an investigator in trials sponsored by Dermascence, Trevi Therapeutics, and Vanda Pharmaceuticals.

**Patient consent** All patients provided written informed consent for participation before enrolment in the trial.

**Ethics approval** This trial was approved by Ethics Committees for all investigational sites.

**Provenance and peer review** Not commissioned; externally peer reviewed.

**Data sharing statement** The deidentified data set for this study is available upon reasonable request from the study sponsor NeRRe Therapeutics Ltd.

**Open access** This is an open access article distributed in accordance with the Creative Commons Attribution Non Commercial (CC BY-NC 4.0) license, which permits others to distribute, remix, adapt, build upon this work non-commercially, and license their derivative works on different terms, provided the original work is properly cited,

appropriate credit is given, any changes made indicated, and the use is non-commercial. See: <http://creativecommons.org/licenses/by-nc/4.0/>.

## REFERENCES

1. Boone SL, Rademaker A, Liu D, et al. Impact and management of skin toxicity associated with anti-epidermal growth factor receptor therapy: survey results. *Oncology* 2007;72:152–9.
2. Balagula Y, Lacouture ME, Cotliar JA. Dermatologic toxicities of targeted anticancer therapies. *J Support Oncol* 2010;8:149–61.
3. Fischer A, Rosen AC, Ensslin CJ, et al. Pruritus to anticancer agents targeting the EGFR, BRAF, and CTLA-4. *Dermatol Ther* 2013;26:135–48.
4. Lacouture ME, Anadkat MJ, Bensadoun RJ, et al. Clinical practice guidelines for the prevention and treatment of EGFR inhibitor-associated dermatologic toxicities. *Support Care Cancer* 2011;19:1079–95.
5. Clabbers JM, Boers-Doets CB, et al. Xerosis and pruritus as major EGFR-associated adverse events. *Support Care Cancer* 2016;24:513–21.
6. Joshi SS, Ortiz S, Witherspoon JN, et al. Effects of epidermal growth factor receptor inhibitor-induced dermatologic toxicities on quality of life. *Cancer* 2010;16:3916–23.
7. Rosen AC, Case EC, Dusza SW, et al. Impact of dermatologic adverse events on quality of life in 283 cancer patients: a questionnaire study in a dermatology referral clinic. *Am J Clin Dermatol* 2013;14:327–33.
8. Santini, D, Vincenzi B, Guida FM, et al. Aprepitant for management of severe pruritus related to biological cancer treatments: a pilot study. *Lancet Oncol* 2012;13:1020–24.
9. Tagrisso [prescribing information]. Wilmington, DE: AstraZeneca Pharmaceuticals LP; 2015.
10. Bauer KA, Hammerman S, Rapoport B, et al. Completeness in the reporting of dermatologic adverse drug reactions associated with monoclonal antibody epidermal growth factor receptor inhibitors in phase II and III colorectal cancer clinical trials. *Clin Colorectal Cancer* 2008;7:309–14.
11. Gandhi M, Oishi K, Zupal B, et al. Unanticipated toxicities from anticancer therapies: survivors' perspectives. *Support Care Cancer* 2010;18:1461–8.
12. Cho SI, Lee J, Lim J, et al. Pruritus in patients under targeted anticancer therapy: A multidimensional analysis using the 5-D itch scale. *Acta Derm Venereol* 2019;99:435–41.
13. Chan A, Tan EH. How well does the MESTT correlate with CTCAE scale for the grading of dermatological toxicities associated with oral tyrosine kinase inhibitors? *Support Care Cancer* 2011;19:1667–74.
14. Steinhoff MS, von Mentzer B, Geppetti P, et al. Tachykinins and their receptors: contributions to physiological control and the mechanisms of disease. *Physiol Rev* 2014;94:265–301.
15. Benecke H, Lotts T, Ständer S. Investigational drugs for pruritus. *Expert Opin Investig Drugs* 2013;22:1167–79.
16. Gerber PA, Buhren BA, Cevikbas F, et al. Preliminary evidence for a role of mast cells in epidermal growth factor receptor inhibitor-induced pruritus. *J Am Acad Dermatol* 2010;63:163–5.
17. Gerber PA, Buhren BA, Homey B. More on aprepitant for erlotinib-induced pruritus. *N Engl J Med* 2011;364:486–7.
18. Harrison S, Geppetti P. Substance P. *Int J Biochem Cell Biol* 2001;33:555–76.
19. Azimi E, Reddy VB, Pereira PJS, et al. Substance P activates Mas-related G protein-coupled receptors to induce itch. *J Allergy Clin Immunol* 2017;140(2):447–53.
20. Carstens E, Akiyama T. Central mechanisms of itch. *Curr Probl Dermatol* 2016;50:11–7.
21. Carstens EE, Carstens MI, Simons CT, et al. Dorsal horn neurons expressing NK-1 receptors mediate scratching in rats. *Neuroreport* 2010;21:303–8.
22. Akiyama T, Nguyen T, Curtis E, et al. A central role for spinal dorsal horn neurons that express neurokinin-1 receptors in chronic itch. *Pain* 2015;156:1240–6.
23. Gao ZR, Chen WZ, Liu MZ, et al. Tac1-expressing neurons in the periaqueductal gray facilitate the itch-scratching cycle via descending regulation. *Neuron* 2019;101:45–59.
24. Hägermark O, Hökfelt T, Pernow B. Flare and itch induced by substance P in human skin. *J Invest Dermatol* 1978;71:233–5.
25. Heyer G, Hornstein OP, Handwerker HO. Reactions to intradermally injected substance P and topically applied mustard oil in atopic dermatitis patients. *Acta Derm Venereol* 1991;71:291–5.
26. Thomsen JS, Sonne M, Benfeldt E, et al. Experimental itch in sodium lauryl sulphate-inflamed and normal skin in humans: A randomised, double-blind, placebo-controlled study of histamine and other inducers of itch. *Br J Dermatol* 2002;146:792–800.

- 1
  - 2
  - 3
  - 4
  - 5
  - 6
  - 7
  - 8
  - 9
  - 10
  - 11
  - 12
  - 13
  - 14
  - 15
  - 16
  - 17
  - 18
  - 19
  - 20
  - 21
  - 22
  - 23
  - 24
  - 25
  - 26
  - 27
  - 28
  - 29
  - 30
  - 31
  - 32
  - 33
  - 34
  - 35
  - 36
  - 37
  - 38
  - 39
  - 40
  - 41
  - 42
  - 43
  - 44
  - 45
  - 46
  - 47
  - 48
  - 49
  - 50
  - 51
  - 52
  - 53
  - 54
  - 55
  - 56
  - 57
  - 58
  - 59
  - 60
27. Andoh T, Nagasawa T, Satoh M, et al. Substance P induction of itch-associated response mediated by cutaneous NK1 tachykinin receptors in mice. *J Pharmacol Exp Ther* 1998;286:1140–5.
28. Trower MK, Fisher A, Upton N, et al. Neurokinin-1 receptor antagonist orvepitant is an effective inhibitor of itch-associated response in a Mongolian gerbil model of scratching behaviour. *Exp Dermatol* 2014;23:858–60.
29. Costantini VJ, Corsi M, Dünstl G, et al. The NK1 receptor antagonist aprepitant attenuates NK1 agonist-induced scratching behaviour in the gerbil after intra-dermal, topical or oral administration. *Exp Dermatol* 2015;24:312–4.
30. Ueda Y, Inoue T, Rahman MA, et al. A new chronic itch model accompanied by skin lesions in hairless mice. *Int Immunopharmacol* 2006;6:1609–15.
31. Ständer S, Luger TA. NK-1 antagonists and itch. *Handb Exp Pharmacol* 2015;226:237–55.
32. Ständer S, Yosipovitch G. Substance P and neurokinin 1 receptor are new targets for the treatment of chronic pruritus. *Br J Dermatol* 2019. doi: 10.1111/bjd.18025. [Epub ahead of print]
33. Ständer S, Siepmann D, Herrgott I, et al. Targeting the neurokinin receptor 1 with aprepitant: a novel antipruritic strategy. *PLoS One* 2010;5:e10968.
34. Duval A, Dubertret L. Aprepitant as an antipruritic agent? *N Engl J Med* 2009;361:1415–6.
35. Booken N, Heck M, Nicolay JP, et al. Oral aprepitant in the therapy of refractory pruritus in erythrodermic cutaneous T-cell lymphoma. *Br J Dermatol* 2011;164:665–7.
36. Torres T, Fernandes I, Selores M, et al. Aprepitant: evidence of its effectiveness in patients with refractory pruritus continues. *J Am Acad Dermatol* 2012;66:e14–5.
37. Ladizinski B, Bazakas A, Olsen EA. Aprepitant: a novel neurokinin-1 receptor/substance P antagonist as antipruritic therapy in cutaneous T-cell lymphoma *J Am Acad Dermatol* 2012;67:e198–9.
38. Vincenzi B, Fratto ME, Santini D, et al. Aprepitant against pruritus in patients with solid tumours. *Support Care Cancer* 2010;18:1229–30.
39. Vincenzi B, Tonini G, Santini D. Aprepitant for erlotinib-induced pruritus. *N Engl J Med* 2010; 363:397–8.
40. Levêque D. Aprepitant for erlotinib-induced pruritus. *N Engl J Med* 2010;363:1680–1.
41. Mir O, Blanchet B, Goldwasser F. More on aprepitant for erlotinib-induced pruritus. *N Engl J Med* 2011;364:487.
42. Vincenzi B, Tonini G, Santini D. Aprepitant for erlotinib-induced pruritus. *N Engl J Med* 2010;364:397–8.
43. Ally MS, Gamba CS, Peng DH, et al. The use of aprepitant in brachioradial pruritus. *JAMA Dermatol* 2013;49:627–8.
44. Huh JW, Jeong YI, Choi KH, et al. Treatment for refractory pruritus using oral aprepitant. *Ann Dermatol* 2016;28:124–5.
45. Jiménez Gallo D, Albarrán Planelles C, Linares Barrios M, et al. Treatment of pruritus in early-stage hypopigmented mycosis fungoides with aprepitant. *Dermatol Ther* 2014;27:178–82.
46. Borja-Consigliere HA, López-Pestaña A, Vidal-Manceño MJ, et al. Aprepitant in the treatment of refractory pruritus secondary to cutaneous T-cell lymphoma. *Actas Dermosifiliogr* 2014;105:716–8.
47. Song JS, Tawa M, Chau NG, et al. Aprepitant for refractory cutaneous T-cell lymphoma-associated pruritus: 4 cases and a review of the literature. *BMC Cancer* 2017;17:200. doi: 10.1186/s12885-017-3194–8.
48. Qin H, Wang F, Wang K, et al. Aprepitant for gefitinib-induced refractory pruritus in Chinese malignancy population. *Ann Transl Med* 2019;7:54.
49. Seki N, Ochiai R, Haruyama T, et al. Need for flexible adjustment of the treatment schedule for aprepitant administration against erlotinib-induced refractory pruritus and skin rash. *Case Rep Oncol* 2019;12:84–90.
50. Santoni M, Conti A, Andrikou K, et al. Risk of pruritus in cancer patients treated with biological therapies: a systematic review and meta-analysis of clinical trials. *Crit Rev Oncol Hematol* 2015;96:206–19.
51. Di Fabio R, Alvaro G, Braggio S, et al. Identification, biological characterization and pharmacophoric analysis of a new potent and selective NK1 receptor antagonist clinical candidate. *Bioorg Med Chem* 2013;21:6264–73.
52. Lindström E, von Mentzer B, Pählman I, et al. Neurokinin 1 receptor antagonists: correlation between in vitro receptor interaction and in vivo efficacy. *J Pharmacol Exp Ther* 2007;322:1286–93.
53. Duffy RA, Varty GB, Morgan CA, et al. Correlation of neurokinin (NK) 1 receptor occupancy in gerbil striatum with behavioral effects of NK1 antagonists. *J Pharmacol Exp Ther* 2002;301:536–42.
54. Kramer MS, Cutler N, Feighner J, et al. Distinct mechanism for antidepressant activity by blockade of central substance P receptors. *Science* 1998;281:1640–5.
55. Ratti E, Bettica P, Alexander R, et al. Full central neurokinin-1 receptor blockade is required for efficacy in depression: evidence from orvepitant clinical studies. *J Psychopharmacol* 2013;27(5):424–34.
56. Bergström M, Hargreaves RJ, Burns HD, et al. Human positron emission tomography studies of brain neurokinin 1 receptor occupancy by aprepitant. *Biol Psychiatry* 2004;55:1007–12.



- 1  
2  
3 57. Phan NQ, Blome C, Frit F, et al. Assessment of pruritus intensity: prospective study on validity and reliability  
4 of the visual analogue scale, numerical rating scale and verbal rating scale in 471 patients with chronic pruritus.  
5 *Acta Derm Venereol* 2012;92:502–7.
- 6 58. Chren, MM. The Skindex instruments to measure the effects of skin disease on quality of life. *Dermatol Clin*  
7 2012;30:231–6.
- 8 59. Pinto C, Barone CA, Girolomoni G, et al. Management of skin toxicity associated with cetuximab treatment in  
9 combination with chemotherapy or radiotherapy. *Oncologist* 2011;16:228–38.
- 10 60. Smith J, Allman D, Badri Het al. The neurokinin-1 receptor antagonist orvepitant is a novel antitussive therapy  
11 for chronic refractory cough: Results from a phase 2 pilot study (VOLCANO-1). *Chest* 2019 Aug 14. pii:  
12 S0012-3692(19)31451–5.
- 13 61. Van Laarhoven AI, van der Sman-Mauriks IM, Donders AR, et al. Placebo effects on itch: a meta-analysis of  
14 clinical trials of patients with dermatological conditions. *J Invest Dermatol* 2015;135:1234–43.
- 15 62. Mascia F, Lam G, Keith C, et al. Genetic ablation of epidermal EGFR reveals the dynamic origin of adverse  
16 effects of anti-EGFR therapy. *Sci Transl Med* 2013;5:199ra110.
- 17 63. Ständer S, Weisshaar E, Mettang et al. Clinical classification of itch: a position paper of the International Forum  
18 for the Study of Itch. *Acta Derm Venereol* 2007;87:2917–4.
- 19 64. Andersen HH, Akiyama T, Nattkemper LA, et al. Allodynia and hyperknesis-mechanisms, assessment  
20 methodology, and clinical implications of itch sensitization. *Pain* 2018;159:1185–1197.
- 21 65. Ikoma A, Fartasch M, Heyer G, et al. Painful stimuli evoke itch in patients with chronic pruritus: central  
22 sensitization for itch. *Neurology* 2004;62:212–7.
- 23 66. Ständer S, Spellman MC, Kwon P, et al. The NK1 receptor antagonist serlopitant for treatment of chronic  
24 pruritus. *Expert Opin Investig Drugs* 2019;28:659–66.
- 25 67. Yosipovitch G, Ständer S, Kerby MB, et al. Serlopitant for the treatment of chronic pruritus: Results of a  
26 randomized, multicenter, placebo-controlled phase 2 clinical trial. *J Am Acad Dermatol* 2018;78:882–891.
- 27 68. Ständer S, Kwon P, Hirman J, et-al; Serlopitant reduced pruritus in patients with prurigo nodularis in a phase 2,  
28 randomized, placebo-controlled trial. *J Am Acad Dermatol* 2019;80:1395–402
- 29 69. Vanda Pharmaceuticals Inc. Vanda's tradipitant improves itch and disease severity in patients with atopic  
30 dermatitis. Web site. <https://vandapharmaceuticalsinc.gcs-web.com/node/8091/pdf>. Updated September 13,  
31 2017. Accessed August 28, 2019.
- 32 70. U.S. National Library of Medicine. ClinicalTrials.gov. Study of the efficacy, safety and tolerability of  
33 serlopitant for the treatment of pruritus (itch) with plaque psoriasis.  
34 <https://clinicaltrials.gov/ct2/show/results/NCT03343639?term=MTI-109&rank=1>. Updated June 27, 2019.  
35 Accessed August 28, 2019.
- 36 71. Beech J, Germetaki T, Judge M, et al. Management and grading of EGFR inhibitor-induced cutaneous toxicity.  
37 *Future Oncol* 2018;14:2531–41.
- 38 72. Ensslin CJ, Rosen AC, Wu S, et al. Pruritus in patients treated with targeted cancer therapies: systematic review  
39 and meta-analysis. *J Am Acad Dermatol* 2013;69:708–20.
- 40 73. Lacouture ME, Schadendorf D, Chu CY, et al. Dermatologic adverse events associated with afatinib: an oral  
41 ErbB family blocker. *Expert Rev Anticancer Ther* 2013;13:721–8.
- 42  
43  
44  
45  
46  
47  
48  
49  
50  
51  
52  
53  
54  
55  
56  
57  
58  
59  
60

1  
2  
3  
4  
5  
6  
7  
8  
9  
10  
11  
12  
13  
14  
15  
16  
17  
18  
19  
20  
21  
22  
23  
24  
25  
26  
27  
28  
29  
30  
31  
32  
33  
34  
35  
36  
37  
38  
39  
40  
41  
42  
43  
44  
45  
46  
47  
48  
49  
50  
51  
52  
53  
54  
55  
56  
57  
58  
59  
60

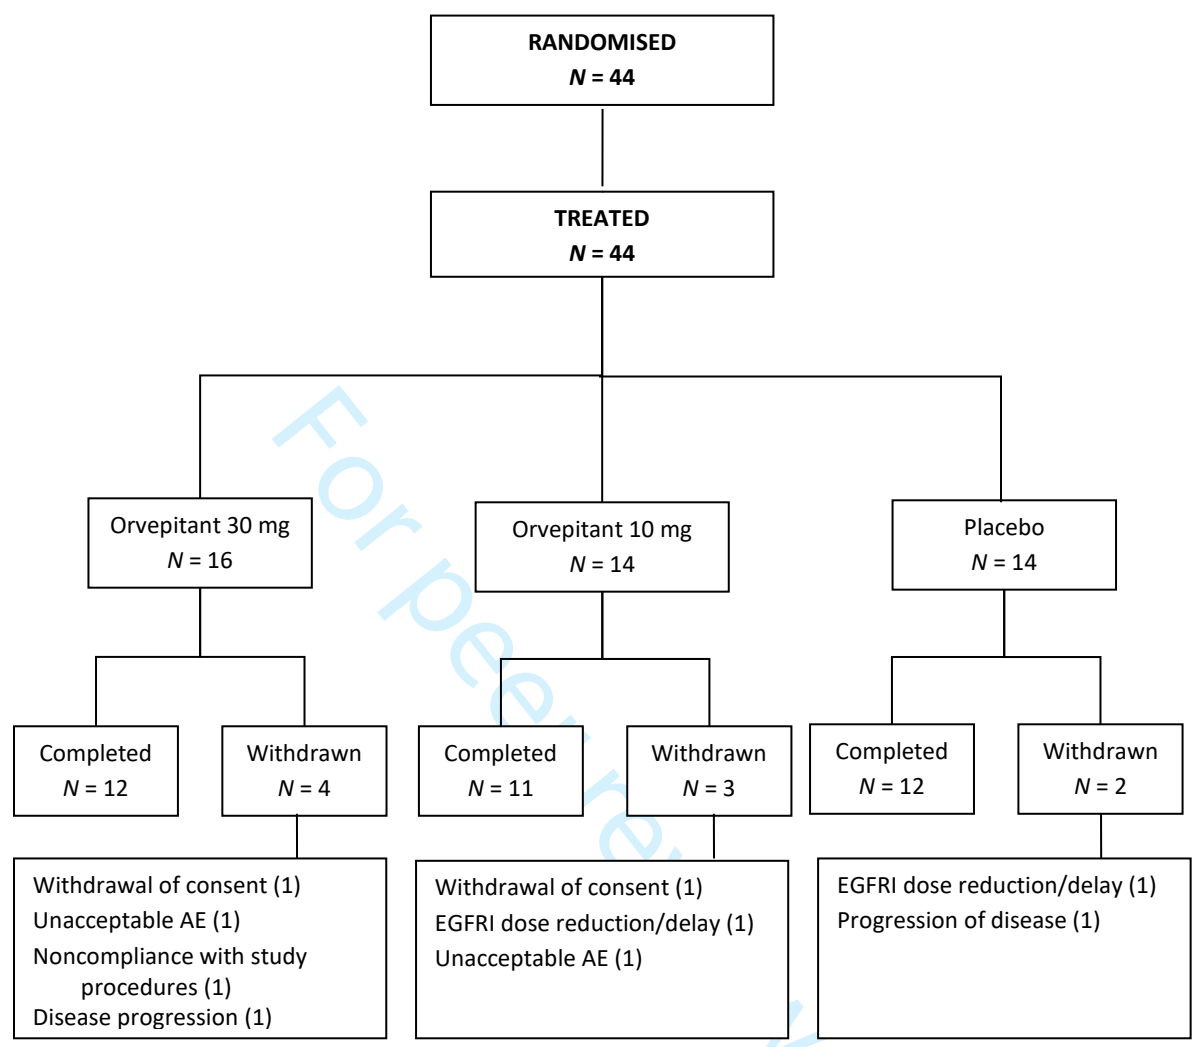

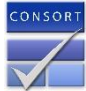

## CONSORT 2010 checklist of information to include when reporting a randomised trial\*

| Section/Topic                    | Item No | Checklist item                                                                                                                                                                              | Reported on page No |
|----------------------------------|---------|---------------------------------------------------------------------------------------------------------------------------------------------------------------------------------------------|---------------------|
| <b>Title and abstract</b>        |         |                                                                                                                                                                                             |                     |
|                                  | 1a      | Identification as a randomised trial in the title                                                                                                                                           | 1                   |
|                                  | 1b      | Structured summary of trial design, methods, results, and conclusions (for specific guidance see CONSORT for abstracts)                                                                     | 2                   |
| <b>Introduction</b>              |         |                                                                                                                                                                                             |                     |
| Background and objectives        | 2a      | Scientific background and explanation of rationale                                                                                                                                          | 3, 4                |
|                                  | 2b      | Specific objectives or hypotheses                                                                                                                                                           | 4                   |
| <b>Methods</b>                   |         |                                                                                                                                                                                             |                     |
| Trial design                     | 3a      | Description of trial design (such as parallel, factorial) including allocation ratio                                                                                                        | 4                   |
|                                  | 3b      | Important changes to methods after trial commencement (such as eligibility criteria), with reasons                                                                                          | 4                   |
| Participants                     | 4a      | Eligibility criteria for participants                                                                                                                                                       | 4                   |
|                                  | 4b      | Settings and locations where the data were collected                                                                                                                                        | 4                   |
| Interventions                    | 5       | The interventions for each group with sufficient details to allow replication, including how and when they were actually administered                                                       | 4                   |
| Outcomes                         | 6a      | Completely defined pre-specified primary and secondary outcome measures, including how and when they were assessed                                                                          | 4, 5                |
|                                  | 6b      | Any changes to trial outcomes after the trial commenced, with reasons                                                                                                                       | Not applicable      |
| Sample size                      | 7a      | How sample size was determined                                                                                                                                                              | 4                   |
|                                  | 7b      | When applicable, explanation of any interim analyses and stopping guidelines                                                                                                                | Not applicable      |
| <b>Randomisation:</b>            |         |                                                                                                                                                                                             |                     |
| Sequence generation              | 8a      | Method used to generate the random allocation sequence                                                                                                                                      | 4                   |
|                                  | 8b      | Type of randomisation; details of any restriction (such as blocking and block size)                                                                                                         | 4                   |
| Allocation concealment mechanism | 9       | Mechanism used to implement the random allocation sequence (such as sequentially numbered containers), describing any steps taken to conceal the sequence until interventions were assigned | 4                   |
| Implementation                   | 10      | Who generated the random allocation sequence, who enrolled participants, and who assigned participants to interventions                                                                     | 4                   |

|    |                                                      |     |                                                                                                                                                   |                |
|----|------------------------------------------------------|-----|---------------------------------------------------------------------------------------------------------------------------------------------------|----------------|
| 1  | Blinding                                             | 11a | If done, who was blinded after assignment to interventions (for example, participants, care providers, those assessing outcomes) and how          | 4              |
| 2  |                                                      |     |                                                                                                                                                   |                |
| 3  |                                                      | 11b | If relevant, description of the similarity of interventions                                                                                       | 4              |
| 4  | Statistical methods                                  | 12a | Statistical methods used to compare groups for primary and secondary outcomes                                                                     | 5              |
| 5  |                                                      | 12b | Methods for additional analyses, such as subgroup analyses and adjusted analyses                                                                  | Not applicable |
| 6  |                                                      |     |                                                                                                                                                   |                |
| 7  | <b>Results</b>                                       |     |                                                                                                                                                   |                |
| 8  | Participant flow (a diagram is strongly recommended) | 13a | For each group, the numbers of participants who were randomly assigned, received intended treatment, and were analysed for the primary outcome    | 5, 6           |
| 9  |                                                      | 13b | For each group, losses and exclusions after randomisation, together with reasons                                                                  | Figure 1       |
| 10 | Recruitment                                          | 14a | Dates defining the periods of recruitment and follow-up                                                                                           | 4              |
| 11 |                                                      | 14b | Why the trial ended or was stopped                                                                                                                | 8,9            |
| 12 | Baseline data                                        | 15  | A table showing baseline demographic and clinical characteristics for each group                                                                  | 5, 6           |
| 13 | Numbers analysed                                     | 16  | For each group, number of participants (denominator) included in each analysis and whether the analysis was by original assigned groups           | 7              |
| 14 |                                                      |     |                                                                                                                                                   |                |
| 15 | Outcomes and estimation                              | 17a | For each primary and secondary outcome, results for each group, and the estimated effect size and its precision (such as 95% confidence interval) | 7, 8 and 9     |
| 16 |                                                      | 17b | For binary outcomes, presentation of both absolute and relative effect sizes is recommended                                                       | Not applicable |
| 17 | Ancillary analyses                                   | 18  | Results of any other analyses performed, including subgroup analyses and adjusted analyses, distinguishing pre-specified from exploratory         | Not applicable |
| 18 |                                                      |     |                                                                                                                                                   |                |
| 19 | Harms                                                | 19  | All important harms or unintended effects in each group (for specific guidance see CONSORT for harms)                                             | 8              |
| 20 |                                                      |     |                                                                                                                                                   |                |
| 21 | <b>Discussion</b>                                    |     |                                                                                                                                                   |                |
| 22 | Limitations                                          | 20  | Trial limitations, addressing sources of potential bias, imprecision, and, if relevant, multiplicity of analyses                                  | 8              |
| 23 | Generalisability                                     | 21  | Generalisability (external validity, applicability) of the trial findings                                                                         | 8, 9           |
| 24 | Interpretation                                       | 22  | Interpretation consistent with results, balancing benefits and harms, and considering other relevant evidence                                     | 8, 9           |
| 25 |                                                      |     |                                                                                                                                                   |                |
| 26 | <b>Other information</b>                             |     |                                                                                                                                                   |                |
| 27 | Registration                                         | 23  | Registration number and name of trial registry                                                                                                    | 2              |
| 28 | Protocol                                             | 24  | Where the full trial protocol can be accessed, if available                                                                                       | Not applicable |
| 29 | Funding                                              | 25  | Sources of funding and other support (such as supply of drugs), role of funders                                                                   | 10             |

\*We strongly recommend reading this statement in conjunction with the CONSORT 2010 Explanation and Elaboration for important clarifications on all the items. If relevant, we also recommend reading CONSORT extensions for cluster randomised trials, non-inferiority and equivalence trials, non-pharmacological treatments, herbal interventions, and pragmatic trials. Additional extensions are forthcoming: for those and for up to date references relevant to this checklist, see [www.consort-statement.org](http://www.consort-statement.org).

# BMJ Open

## The neurokinin-1 antagonist orvepitant for EGFR-induced pruritus in cancer patients: a randomised, placebo-controlled, phase II trial

|                                 |                                                                                                                                                                                                                                                                                                                                                                                                                                                                                                                                                                                                                    |
|---------------------------------|--------------------------------------------------------------------------------------------------------------------------------------------------------------------------------------------------------------------------------------------------------------------------------------------------------------------------------------------------------------------------------------------------------------------------------------------------------------------------------------------------------------------------------------------------------------------------------------------------------------------|
| Journal:                        | <i>BMJ Open</i>                                                                                                                                                                                                                                                                                                                                                                                                                                                                                                                                                                                                    |
| Manuscript ID                   | bmjopen-2019-030114.R3                                                                                                                                                                                                                                                                                                                                                                                                                                                                                                                                                                                             |
| Article Type:                   | Original research                                                                                                                                                                                                                                                                                                                                                                                                                                                                                                                                                                                                  |
| Date Submitted by the Author:   | 11-Dec-2019                                                                                                                                                                                                                                                                                                                                                                                                                                                                                                                                                                                                        |
| Complete List of Authors:       | Vincenzi, Bruno; Universita Campus Bio-Medico di Roma Facolta di Medicina e Chirurgia,<br>Trower, Mike; NeRRe Therapeutics Ltd<br>Duggal, Ajay; Adnovate Clinical Development Strategies Ltd<br>Guglielmini, Pamela; A.S.O. S.S. Antonio e Biagio e C. Arrigo<br>Harris, Peter; NeRRe Therapeutics Ltd<br>Jackson, David; Cromsource<br>Lacouture, Mario E.; Mem Sloan Kettering Canc Ctr<br>Ratti, Emiliangelo; Takeda Pharmaceuticals Company<br>Tonini, Giuseppe; Università Campus Bio-Medico di Roma, Medical Oncology<br>Wood, Andrew; Idfac Ltd<br>Ständer, Sonja; University Hospital Münster, Dermatology |
| <b>Primary Subject Heading</b>: | Dermatology                                                                                                                                                                                                                                                                                                                                                                                                                                                                                                                                                                                                        |
| Secondary Subject Heading:      | Oncology, Pharmacology and therapeutics                                                                                                                                                                                                                                                                                                                                                                                                                                                                                                                                                                            |
| Keywords:                       | EGFR Inhibitor, neurokinin-1 antagonist, orvepitant, pruritus                                                                                                                                                                                                                                                                                                                                                                                                                                                                                                                                                      |
|                                 |                                                                                                                                                                                                                                                                                                                                                                                                                                                                                                                                                                                                                    |

SCHOLARONE™  
Manuscripts



I, the Submitting Author has the right to grant and does grant on behalf of all authors of the Work (as defined in the below author licence), an exclusive licence and/or a non-exclusive licence for contributions from authors who are: i) UK Crown employees; ii) where BMJ has agreed a CC-BY licence shall apply, and/or iii) in accordance with the terms applicable for US Federal Government officers or employees acting as part of their official duties; on a worldwide, perpetual, irrevocable, royalty-free basis to BMJ Publishing Group Ltd ("BMJ") its licensees and where the relevant Journal is co-owned by BMJ to the co-owners of the Journal, to publish the Work in this journal and any other BMJ products and to exploit all rights, as set out in our [licence](#).

The Submitting Author accepts and understands that any supply made under these terms is made by BMJ to the Submitting Author unless you are acting as an employee on behalf of your employer or a postgraduate student of an affiliated institution which is paying any applicable article publishing charge ("APC") for Open Access articles. Where the Submitting Author wishes to make the Work available on an Open Access basis (and intends to pay the relevant APC), the terms of reuse of such Open Access shall be governed by a Creative Commons licence – details of these licences and which [Creative Commons](#) licence will apply to this Work are set out in our licence referred to above.

Other than as permitted in any relevant BMJ Author's Self Archiving Policies, I confirm this Work has not been accepted for publication elsewhere, is not being considered for publication elsewhere and does not duplicate material already published. I confirm all authors consent to publication of this Work and authorise the granting of this licence.

**TITLE:** The neurokinin-1 antagonist orvepitant for EGFR-induced pruritus in cancer patients: a randomised, placebo-controlled, phase II trial

**AUTHORS:** Bruno Vincenzi<sup>1\*</sup> (0000-0001-8222-9025), Mike Trower<sup>2\*</sup> (0000-0003-0412-5719), Ajay Duggal<sup>3</sup> (0000-0003-3294-616X), Pamela Guglielmini<sup>4</sup> (0000-0003-3612-7786), Peter Harris<sup>2</sup> (0000-0002-8374-3859), David Jackson<sup>5</sup> (0000-0002-4448-8648), Mario Lacouture<sup>6</sup> (0000-0002-4818-3710), Emiliangelo Ratti<sup>7\*\*</sup> (0000-0002-7352-4695), Giuseppe Tonini<sup>1</sup> (0000-0003-4442-8677), Andrew Wood<sup>8</sup> (0000-0001-7536-6398), Sonja Ständer<sup>9</sup> (0000-0003-3612-7786)

**AFFILIATIONS:**

<sup>1</sup>Medical Oncology, Università Campus Bio-Medico di Roma, Rome, Italy

<sup>2</sup>NeRRe Therapeutics Ltd, Stevenage, UK

<sup>3</sup>Adnovate Clinical Development Strategies Ltd, East Sussex, UK

<sup>4</sup>A.S.O. S.S. Antonio e Biagio e C. Arrigo, Alessandria, Italy

<sup>5</sup>Cromsource, Stirling, UK

<sup>6</sup>Memorial Sloan Kettering Cancer Center, New York, US

<sup>7</sup>Takeda Pharmaceuticals Company, Boston, US

<sup>8</sup>Idfac Ltd, Devon, UK

<sup>9</sup>Center for Chronic Pruritus, University Hospital Münster, Münster, Germany

\*Dr Vincenzi and Dr Trower contributed equally to this work.

\*\*Current affiliation for E. Ratti

**CORRESPONDING AUTHOR:** Mike Trower, PhD

**Address:** NeRRe Therapeutics Ltd, Stevenage Bioscience Catalyst, Stevenage SG1 2FX, UK

**Phone:** +44 1438 906960

**Email:** mike.trower@nerretherapeutics.com

**WORD COUNT:** 3845 words

## ABSTRACT

**Objective** To evaluate the efficacy of orvepitant (10 or 30 mg given once daily, orally for 4 weeks), a neurokinin-1 receptor antagonist, compared with placebo in reducing the intensity of epidermal growth factor receptor inhibitor (EGFRI)-induced intense pruritus

**Design** Randomised, double-blind, placebo-controlled clinical trial

**Setting** 15 hospitals in Italy and 5 hospitals in the United Kingdom

**Participants** 44 patients aged  $\geq 18$  years receiving an EGFRI for a histologically confirmed malignant solid tumour and experiencing moderate or intense pruritus after EGFRI treatment

**Intervention** 30 mg or 10 mg orvepitant or placebo tablets once daily for 4 weeks (randomised 1:1:1)

**Primary and secondary outcome measures** The primary endpoint was change from Baseline in mean patient-recorded numerical rating scale (NRS) score (over the last 3 recordings) at Week 4. Secondary outcome measures were NRS score, verbal rating scale score, Skindex-16, and Leeds Sleep Evaluation Questionnaire at each study visit (Baseline, Weeks 1, 4, 8); rescue medication use; EGFRI dose reduction; and study withdrawal because of intense uncontrolled pruritus.

**Results** The trial was terminated early because of recruitment challenges; only 44 of the planned 90 patients were randomised. All patients were analysed for efficacy and safety. Mean NRS score change from Baseline to Week 4 was -2.78 (SD: 2.64) points in the 30 mg group, -3.04 (SD: 3.06) points in the 10 mg group, and -3.21 (SD: 1.77) points in the placebo group; the difference between orvepitant and placebo was not statistically significant. No safety signal was detected. Adverse events related to orvepitant (asthenia, dizziness, dry mouth, hyperhidrosis) were all of mild or moderate severity.

**Conclusions** Orvepitant was safe and well tolerated. No difference in NRS score between the orvepitant and placebo groups was observed at the Week 4 primary endpoint. A number of explanations for this outcome are possible.

**Trial registration number** EudraCT 2013-002763-25

**KEY WORDS:** pruritus, EGFR inhibitor, neurokinin-1 antagonist, orvepitant

### STRENGTHS AND LIMITATIONS OF THIS STUDY

- ▶ The RELIEVE 1 study was the first randomised, double-blind, placebo-controlled study of a neurokinin-1 antagonist for EGFRI-induced pruritus.
- ▶ Patients reported scores for the primary endpoint of reduction of itch intensity on a daily basis using an interactive voice response system.
- ▶ Effects on sleep and quality of life were also measured.
- ▶ Itch is a subjective symptom and thus susceptible to a placebo effect.
- ▶ The enrolment target was not reached because of recruitment problems in the target population.



## INTRODUCTION

While targeted biological therapies have increased patient survival for several tumour types, they are linked with a variety of adverse events (AEs), particularly dermatological AEs, including acneiform rash, hair changes, mucositis, xerosis/fissures, paronychia, and pruritus. Epidermal growth factor receptor inhibitors (EGFRIs) specifically are associated with these dermatological AEs that can require dose modification or treatment interruptions and thus interfere with these potentially life-prolonging therapies.<sup>1-5</sup> Rash, xerosis, and pruritus have the greatest impact on patient quality of life.<sup>5-7</sup> Pruritus incidence reported in clinical trials of anti-EGFR monoclonal antibodies (mAbs) and small-molecule EGFRIs ranges from 8% to 69% depending on the agent involved.<sup>8-9</sup> EGFRi-induced pruritus may be underreported or incompletely reported in clinical studies.<sup>10</sup> In a survey of cancer patients and survivors, pruritus is common and debilitating.<sup>11,12</sup> Lacouture et al. reported that pruritus occurs in approximately half of all patients treated with EGFRIs.<sup>4</sup> Finally, in a review of interviews conducted with 100 patients taking mainly EGFR mAbs, 72% of patients reported experiencing pruritus.<sup>13</sup> A safe and effective cancer-supportive care therapy to ameliorate the itching burden these patients experience is urgently needed.

Neurokinin-1 (NK1) receptors are 7-transmembrane receptors with a preferred peptide agonist ligand of substance P (SP).<sup>14</sup> SP produced by peripheral skin sensory nerve fibres is thought to promote itching via activation of NK1 receptors on keratinocytes and mast cells causing local inflammatory and vasodilatory effects.<sup>15</sup> Interestingly, Gerber et al. reported that mast cells significantly accumulate in the lesional skin of patients treated with EGFRIs and suggested that the antipruritic activity of the NK1 receptor antagonist aprepitant in this population is achieved by blocking the activation of mast cell NK1 receptors by SP, thereby preventing the release of mast cell histamine and other proinflammatory/pruritogenic mediators.<sup>16-18</sup> Recently another receptor, the Mas-related G-protein coupled receptor member X2 (MrgprX2), has been shown to be activated in humans by SP, and this interaction may contribute additionally to the proinflammatory effects mediated by mast cell degranulation.<sup>19</sup> SP and the NK1 receptor are also widely expressed centrally and have a role in transmission of the peripheral itch signal via the spinal superficial dorsal horn to higher brain centres for processing.<sup>20</sup> In rodents scratching behaviour can be blocked by neurotoxic destruction of spinal NK1 receptor-expressing neurons,<sup>21,22</sup> and *Tac1* (the gene encoding SP)-expressing spinal neurons has also been linked to the promotion of scratching behaviour.<sup>23</sup> Intradermal injection of SP in humans causes pruritus, erythema, and oedema.<sup>24-26</sup> Scratching behaviour induced by intradermal injection of either SP or a NK1 agonist or topical administration of a hapten in animals can all be profoundly reduced by NK1 antagonist treatment, including both orvepitant and aprepitant.<sup>27-30</sup> These data suggest that the NK1 receptor system is involved in itch signalling and therefore blockade of these pathways with NK1 receptor antagonists represents a potentially promising therapy for pruritic conditions, including EGFRi-induced pruritus.<sup>31,32</sup>

Aprepitant (Emend<sup>®</sup>, formerly MK-869) is the first commercially available drug of a new class of NK1 receptor antagonists for the prevention of chemotherapy-induced and postoperative nausea and vomiting. It has been evaluated in numerous open-label clinical studies of patients suffering from treatment-refractory pruritus, including a large number of patients suffering with acute EGFRi-induced pruritus.<sup>33-49</sup> In these uncontrolled studies, aprepitant acted as a rapid and highly effective antipruritic medication that also significantly improved patients' quality of life, leading to advocacy for clinical assessment of aprepitant and other emerging NK1 receptor antagonists in patients receiving agents with a high risk of pruritus.<sup>50</sup>

Like aprepitant, orvepitant is an orally active, potent, brain-penetrant, and selective non-surmountable NK1 antagonist that blocks SP signalling.<sup>51-53</sup> These compounds are active in the well characterised NK1 receptor pharmacodynamic gerbil foot-tapping model, in preclinical models of anxiety,<sup>51-54</sup> and, as reported above, in the gerbil scratching behaviour model.<sup>28,29</sup> In humans both compounds have pharmacokinetic properties consistent with once-daily oral dosing sufficient to achieve therapeutic plasma exposures that have high levels of central NK1 receptor occupancy.<sup>55,56</sup> Thus, orvepitant would be expected to achieve antipruritic efficacy similar to that of aprepitant in patients suffering from intense itch as a result of EGFRi treatment. The RELIEVE 1 study evaluating

1  
2  
3 the efficacy and safety of orvepitant is the first randomised, double-blind, placebo-controlled study of an NK1  
4 antagonist for EGFR-induced pruritus.  
5

## 6 **METHODS**

### 7 **Patient and public involvement**

8  
9  
10 The indication, research questions and study endpoint outcome measures were selected based on the authors expert  
11 understanding in the care of affected patients, their needs and therapy preferences, without direct communication of  
12 the study design to patients. Experience from guideline work, which involved patients preferences, was also carried  
13 over into the study design. Patients were not involved in the recruitment nor conduct of the study, nor the  
14 interpretation of results. No commitment was made to disseminate the results to study participants. Patients assessed  
15 the burden of the intervention themselves. Patients were not invited to contribute to the writing nor editing of this  
16 document for either readability or accuracy.  
17

### 18 **Study design and enrolment**

19  
20 The primary objective of this exploratory Phase 2, multicentre, randomised, double-blind, placebo-controlled  
21 clinical trial was to evaluate the efficacy of orvepitant compared with placebo in reducing the intensity of intense  
22 EGFR-induced pruritus. Pruritus intensity was measured primarily by change from Baseline in patient-recorded  
23 numerical rating scale (NRS) score ranging from 0 (no itch) to 10 (worst itch imaginable) points. On the basis of an  
24 assumed between-patient standard deviation (SD) of 2 points,<sup>8</sup> 23 patients per treatment arm were required to  
25 provide 80% power for a 2-sided 5% significance level hypothesis test to achieve a significant result when the true  
26 difference is at least 2 points. It was thus planned to enrol 30 patients per arm (90 total). After 20 months of  
27 recruitment, this target was far from being reached, and a blinded analysis of data variance showing between-patient  
28 SD of 2.6 points indicated that it was highly unlikely that a statistically robust assessment of benefit could be made  
29 even if enrolment were completed. The sponsor decided to terminate enrolment. However, the study data for all  
30 enrolled patients were analysed.  
31  
32

### 33 **Patients and treatments**

34  
35 Patients were enrolled at 15 hospitals in Italy and 5 hospitals in the United Kingdom between 13 November 2013  
36 and 11 May 2015. Key eligibility criteria were age 18 years and older, monotherapy with an EGFR (including  
37 cetuximab, panitumumab, erlotinib, gefitinib, lapatinib, and afatinib) for a histologically confirmed malignant solid  
38 tumour, moderate or intense pruritus after treatment with the EGFR (defined as the mean of between 2 and 7 daily  
39 patient-reported average pruritus intensity NRS scores initially  $\geq 7$  and subsequently changed in April 2014 to  $\geq 5$   
40 to improve study recruitment), pruritus treatment within the previous 3 months, and no use of aprepitant or  
41 fosaprepitant in the previous 4 weeks. The investigators randomised eligible patients according to a central  
42 randomisation code generated by the sponsor using an interactive voice response system (IVRS). The patients were  
43 assigned in a 1:1:1 ratio to receive 30 mg orvepitant, 10 mg orvepitant, or placebo tablets once daily (in the evening  
44 before bedtime) for 4 weeks. Randomisation was stratified by investigational site; block size was 6. Placebo tablets  
45 were identical in appearance to orvepitant tablets.  
46  
47

### 48 **Assessments**

49  
50 Patients were followed-up for 4 weeks after treatment was completed or discontinued. Patients reported their NRS  
51 scores daily using an IVRS between Baseline and Week 8. At each study visit (Baseline, Week 1, Week 4, Week 8)  
52 an NRS score and a verbal rating scale (VRS) score were recorded. The VRS score was assigned in response to the  
53 following questions: How intense was your pruritus during the past 24 hours? Did you have no pruritus, weak  
54 pruritus, moderate pruritus, severe pruritus, or very severe pruritus? Scores ranged from 0 (no pruritus) to 4 (very  
55 severe pruritus). Both the NRS and VRS are validated instruments for the measurement of pruritus intensity.<sup>57</sup> At  
56  
57

each study visit, the patients also completed the Skindex-16 (an instrument to measure the effects of skin disease on health-related quality of life),<sup>58</sup> and the Leeds Sleep Evaluation Questionnaire (LSEQ; a 10-item instrument to assess changes in sleep quality over the course of an intervention). Safety was assessed by physical examination (including Eastern Cooperative Oncology Group [ECOG] status) and 12-lead electrocardiogram (ECG) at Baseline and Week 8, vital signs and laboratory tests (haematology, serum biochemistry, urinalysis) at each visit, and recording of AEs throughout the study. AEs were graded and categorised according to the National Cancer Institute's Common Terminology Criteria for Adverse Events (CTCAE). Use of concomitant medications, including EGFRIs and any rescue medication, was recorded throughout the study. Sparse pharmacokinetic sampling was conducted to allow for exploratory analysis of the correlation of orvepitant plasma levels with clinical efficacy and secondary assessment scores.

## Endpoints

The primary endpoint was change from Baseline in mean patient-recorded NRS score (over the last 3 recordings) at Week 4. Secondary endpoints were also evaluated: change from Baseline in mean patient-recorded NRS score (last 3 recordings) each week; change from Baseline in mean patient-recorded NRS score (all values in the week) at Weeks 1, 4, 8; change from Baseline in patient-recorded NRS score at Days 2, 3, 4, 5, 6, 7, 8; change from Week 4 in patient-recorded NRS score (over the last 3 recordings) at Weeks 5, 6, 7, 8; change from Week 4 in VRS score at Week 8; change from Baseline in Skindex-16 quality of life at Weeks, 1, 4, 8; change from Baseline in LSEQ at Weeks, 1, 4, 8; rescue medication use; EGFRi dose reduction; and study withdrawal because of intense uncontrolled pruritus.

## Statistical analysis

Efficacy endpoints were analysed in the modified intention-to-treat (mITT) population of all randomised patients who had received at least the first dose of study medication and had at least 1 post-treatment efficacy assessment. The primary endpoint was analysed by mixed-model repeated measures analysis with the primary inference being the change from Baseline in patient-reported NRS scores averaged across the last 3 values of the fourth week of dosing fitted as the response variable in the mixed model. The model included treatment group, study pooled site, study visit, the interaction between study visit and treatment group, the covariate (the baseline value of the variable being analysed) and the interaction between baseline covariate and visit. The 3 treatment groups were analysed together in one model. Point estimates and corresponding 95% confidence intervals were constructed for the difference between each dose of orvepitant and placebo for each week. The primary efficacy endpoint was tested at a 5% level of significance using a two-sided test to test orvepitant 30 mg versus placebo, and no adjustment for multiple comparisons was made for the patient-recorded NRS score orvepitant 10 mg versus placebo test or the secondary and exploratory endpoints. Safety was analysed in the safety population of all patients who received a dose of study medication using descriptive statistics.

## RESULTS

### Patients

A total of 44 patients were randomised and treated: 16 to orvepitant 30 mg, 14 to orvepitant 10 mg, and 14 to placebo. Nine patients discontinued the study (Figure 1). All patients were Caucasian, and 26 (59%) were male and 18 (41%) female. Median age was 68 years (range: 35 to 83 years), and 32 (73%) patients were aged 65 or older. Mean baseline NRS score ranged from 5.88 (SD: 0.93) in the placebo group to 6.68 (SD: 1.28) in the 30 mg orvepitant group. At Baseline, most patients had moderate to severe pruritus, and the most common locations were the head (specifically the scalp 26 [59%] patients) and the trunk (11 [25%]). Baseline assessments of acneiform rash and maculopapular rash showed a similar pattern (Table 1).

Table 1. Demographic and baseline characteristics

| Characteristic                                       | Orvepitant 30 mg<br>N = 16 | Orvepitant 10 mg<br>N = 14 | Placebo<br>N = 14 | Total<br>N = 44 |
|------------------------------------------------------|----------------------------|----------------------------|-------------------|-----------------|
| Age (years), median (range)                          | 69.0 (43, 83)              | 73.5 (49, 81)              | 67.0 (35, 76)     | 68.0 (35, 83)   |
| Age groups, n (%)                                    |                            |                            |                   |                 |
| < 65 years                                           | 4 (25.0)                   | 4 (28.6)                   | 4 (28.6)          | 12 (27.3)       |
| ≥ 65 years                                           | 12 (75.0)                  | 10 (71.4)                  | 10 (71.4)         | 32 (72.7)       |
| Gender, n (%)                                        |                            |                            |                   |                 |
| Female                                               | 5 (31.3)                   | 5 (35.7)                   | 8 (57.1)          | 18 (40.9)       |
| Male                                                 | 11 (68.8)                  | 9 (64.3)                   | 6 (42.9)          | 26 (59.1)       |
| Race, n (%)                                          |                            |                            |                   |                 |
| Caucasian                                            | 16 (100.0)                 | 14 (100.0)                 | 14 (100.0)        | 44 (100.0)      |
| Time since cancer diagnosis (months), median (range) | 17.5 (1, 131)              | 29.7 (12, 129)             | 20.8 (5, 60)      | 23.0 (1, 131)   |
| Patient-reported NRS score                           |                            |                            |                   |                 |
| Mean (SD)                                            | 6.68 (1.278)               | 6.95 (1.4.13)              | 5.88 (0.930)      | NC              |
| Median (range)                                       | 6.86 (4.8, 9.3)            | 7.00 (5.0, 10.0)           | 5.57 (5.0, 7.4)   | NC              |
| <b>PRURITUS</b>                                      |                            |                            |                   |                 |
| CTCAE grade, n (%)                                   |                            |                            |                   |                 |
| Grade 1                                              | 2 (12.5)                   | 0                          | 0                 | 2 (4.5)         |
| Grade 2                                              | 8 (50.0)                   | 9 (64.3)                   | 11 (78.6)         | 28 (63.6)       |
| Grade 3                                              | 5 (31.3)                   | 5 (35.7)                   | 3 (21.4)          | 13 (29.5)       |
| Unknown                                              | 1 (6.3)                    | 0                          | 0                 | 1 (2.3)         |
| Location, n (%)                                      |                            |                            |                   |                 |
| Head                                                 | 8 (50.0)                   | 6 (42.9)                   | 12 (85.7)         | 26 (59.1)       |
| Trunk                                                | 7 (43.8)                   | 3 (21.4)                   | 1 (7.1)           | 11 (25.0)       |
| Arms                                                 | 0                          | 3 (21.4)                   | 0                 | 3 (6.8)         |
| Legs                                                 | 0                          | 2 (14.3)                   | 1 (7.1)           | 3 (6.8)         |
| Unknown                                              | 1 (6.3)                    | 0                          | 0                 | 1 (2.3)         |
| <b>ACNEIFORM RASH</b>                                |                            |                            |                   |                 |
| CTCAE grade, n (%)                                   |                            |                            |                   |                 |
| Grade 1                                              | 2 (12.5)                   | 3 (21.4)                   | 2 (14.3)          | 7 (15.9)        |
| Grade 2                                              | 7 (43.8)                   | 7 (50.0)                   | 10 (71.4)         | 24 (54.5)       |
| Grade 3                                              | 6 (37.5)                   | 3 (21.4)                   | 1 (7.1)           | 10 (22.7)       |
| Unknown                                              | 1 (6.3)                    | 1 (7.1)                    | 1 (7.1)           | 3 (6.8)         |
| Location, n (%)                                      |                            |                            |                   |                 |
| Head                                                 | 7 (43.8)                   | 5 (35.7)                   | 11 (78.6)         | 23 (52.3)       |
| Trunk                                                | 7 (43.8)                   | 5 (35.7)                   | 0                 | 12 (27.3)       |
| Arms                                                 | 1 (6.3)                    | 3 (21.4)                   | 1 (7.1)           | 5 (11.4)        |
| Legs                                                 | 0                          | 0                          | 1 (7.1)           | 1 (2.3)         |
| Unknown                                              | 1 (6.3)                    | 1 (7.1)                    | 1 (7.1)           | 3 (6.8)         |
| <b>MACULOPAPULAR RASH</b>                            |                            |                            |                   |                 |

| CTCAE grade, n (%)                                                                                                                  |          |          |           |           |
|-------------------------------------------------------------------------------------------------------------------------------------|----------|----------|-----------|-----------|
| Grade 1                                                                                                                             | 3 (18.8) | 5 (35.7) | 5 (35.7)  | 13 (29.5) |
| Grade 2                                                                                                                             | 8 (50.0) | 5 (35.7) | 8 (57.1)  | 21 (47.7) |
| Grade 3                                                                                                                             | 4 (25.0) | 3 (21.4) | 0         | 7 (15.9)  |
| Unknown                                                                                                                             | 1 (6.3)  | 1 (7.1)  | 1 (7.1)   | 3 (6.8)   |
| Location, n (%)                                                                                                                     |          |          |           |           |
| Head                                                                                                                                | 7 (43.8) | 5 (35.7) | 12 (85.7) | 24 (54.5) |
| Trunk                                                                                                                               | 7 (43.8) | 4 (28.6) | 0         | 11 (25.0) |
| Arms                                                                                                                                | 1 (6.3)  | 4 (28.6) | 0         | 5 (11.4)  |
| Legs                                                                                                                                | 0        | 0        | 1 (7.1)   | 1 (2.3)   |
| Unknown                                                                                                                             | 1 (6.3)  | 1 (7.1)  | 1 (7.1)   | 3 (6.8)   |
| CTCAE = Common Terminology Criteria for Adverse Events; NC = not calculated; NRS = numerical rating scale; SD = standard deviation. |          |          |           |           |

The median dose number was 28 (range: 1 to 35) in the 30 mg group, 28 (range: 1 to 35) in the 10 mg group, and 29 (range: 28 to 39) in the placebo group. Five (11%) patients (all in the orvepitant groups) took the study drug for 1 week or less; 18 (41%) patients took the study drug (orvepitant or placebo) for 1 to 4 weeks, and 21 (48%) took the study drug for >4 weeks (maximum: 39 days).

All 44 patients were included in the mITT and safety populations and analysed according to the randomised treatment.

### Efficacy

Patient compliance with daily reporting of NRS score was high; mean compliance rate was 92%, and median compliance rate was 100%. At Week 4, 38 subjects remained in the study. NRS score decreased from Baseline to Week 4 in all 3 groups (Table 2). The difference between orvepitant and placebo was not, however, statistically significant (30 mg group:  $P = 0.12$ , 10 mg group:  $P = 0.19$ ).

**Table 2. Change from Baseline in patient-reported numerical reporting scale scores at Week 4**

| Statistic                                                                         | Orvepitant 30 mg<br><i>N</i> = 16 | Orvepitant 10 mg<br><i>N</i> = 14 | Placebo<br><i>N</i> = 14 |
|-----------------------------------------------------------------------------------|-----------------------------------|-----------------------------------|--------------------------|
| <b>n</b>                                                                          | <b>13</b>                         | <b>11</b>                         | <b>14</b>                |
| Mean (SD)                                                                         | -2.78 (2.64)                      | -3.04 (3.06)                      | -3.21 (1.77)             |
| Median                                                                            | -2.75                             | -2.00                             | -2.50                    |
| Minimum, maximum                                                                  | -6.3, 3.0                         | -8.3, 1.1                         | -6.3, 0.0                |
| LSMEANS estimate (95% CI)                                                         | -2.40 (-3.54, -1.27)              | -2.53 (-3.80, -1.27)              | -3.70 (-4.88, -2.52)     |
| LSMEANS standard error                                                            | 0.56                              | 0.62                              | 0.58                     |
| Orvepitant vs placebo difference (95% CI)                                         | 1.30 (-0.35, 2.95)                | 1.17 (-0.62, 2.96)                |                          |
| <i>P</i> value                                                                    | 0.120                             | 0.194                             |                          |
| CI = confidence interval; LSMEANS = least-squares means; SD = standard deviation. |                                   |                                   |                          |

Note: Analysis results from mixed-model repeated measures analysis (Week 1 to Week 4) of the 3 treatment groups analysed together in one model: Change from Baseline = Treatment + Pooled Site + Visit + Treatment\*Visit + Baseline Results + Visit\*Baseline Covariate Interaction

Secondary NRS and VRS endpoints reflected the results for the primary endpoint (Table 3). Change from Baseline in Skindex-16 and LSEQ score showed no difference between the treatment groups at any time point. Rescue medication use and EGFR dose reduction both occurred in 7 (16%) patients (3 in the orvepitant 30 mg group and 2 each in the orvepitant 10 mg and placebo groups). No subjects withdrew from the study because of intense uncontrolled pruritus.

**Table 3. Summary of secondary efficacy endpoints**

| Statistic                                                | Orvepitant 30 mg<br>N = 16 | Orvepitant 10 mg<br>N = 14 | Placebo<br>N = 14  |
|----------------------------------------------------------|----------------------------|----------------------------|--------------------|
| <b>Change from Baseline, (n) Mean (SD)</b>               |                            |                            |                    |
| Patient-recorded NRS score (last 3 recordings) at Week 1 | (16) -1.18 (1.55)          | (13) -1.66 (2.48)          | (14) -1.16 (1.41)  |
| Patient-recorded NRS score (last 3 recordings) at Week 2 | (14) -2.33 (2.00)          | (13) -2.85 (3.43)          | (13) -2.76 (1.96)  |
| Patient-recorded NRS score (last 3 recordings) at Week 3 | (14) -2.16 (2.56)          | (11) -3.14 (2.77)          | (14) -3.26 (2.00)  |
| Patient-recorded NRS score (last 3 recordings) at Week 5 | (13) -3.19 (2.88)          | (10) -3.32 (3.19)          | (14) -3.90 (2.19)  |
| Patient-recorded NRS score (last 3 recordings) at Week 6 | (13) -3.24 (2.89)          | (10) -3.68 (2.55)          | (13) -4.00 (1.78)  |
| Patient-recorded NRS score (last 3 recordings) at Week 7 | (12) -2.49 (2.91)          | (10) -2.85 (2.52)          | (12) -4.13 (2.33)  |
| Patient-recorded NRS score (last 3 recordings) at Week 8 | (11) -2.86 (2.91)          | (10) -3.18 (2.68)          | (12) -4.32 (2.27)  |
| Patient-recorded NRS score (all week) at Week 1          | (16) -0.96 (1.09)          | (13) -1.34 (1.93)          | (14) -0.86 (1.00)  |
| Patient-recorded NRS score (all week) at Week 4          | (13) -2.64 (2.61)          | (11) -3.05 (3.00)          | (14) -3.20 (1.96)  |
| Patient-recorded NRS score (all week) at Week 8          | (11) -2.65 (2.81)          | (10) -3.15 (2.66)          | (12) -4.29 (2.33)  |
| Clinic-visit NRS score at Week 1                         | (14) -1.93 (1.73)          | (14) -2.21 (3.19)          | (14) -3.00 (2.60)  |
| Clinic-visit NRS score at Week 4                         | (13) -3.38 (2.69)          | (11) -4.27 (2.94)          | (14) -4.14 (2.18)  |
| Clinic-visit NRS score at Week 8                         | (13) -3.50 (2.71)          | (11) -3.91 (2.66)          | (12) -3.92 (2.35)  |
| Patient-recorded NRS score at Day 2                      | (16) -0.61 (1.29)          | (12) -0.84 (1.24)          | (13) -0.33 (0.74)  |
| Patient-recorded NRS score at Day 3                      | (14) -0.96 (0.99)          | (11) -0.86 (1.64)          | (13) -0.41 (0.65)  |
| Patient-recorded NRS score at Day 4                      | (14) -0.85 (1.09)          | (12) -1.04 (1.88)          | (14) -0.81 (1.28)  |
| Patient-recorded NRS score at Day 5                      | (13) -1.35 (1.12)          | (12) -1.29 (2.23)          | (13) -1.18 (1.45)  |
| Patient-recorded NRS score at Day 6                      | (14) -1.28 (1.68)          | (11) -1.31 (2.20)          | (11) -1.30 (1.54)  |
| Patient-recorded NRS score at Day 7                      | (14) -1.42 (2.30)          | (12) -1.87 (3.63)          | (13) -1.33 (1.89)  |
| Patient-recorded NRS score at Day 8                      | (14) -1.85 (2.31)          | (11) -1.83 (2.42)          | (14) -1.88 (2.03)  |
| Skindex-16 at Week 1: Symptoms                           | (14) -12.56 (22.25)        | (13) 1.24 (25.05)          | (13) -2.88 (18.50) |

|                                                          |                     |                     |                     |
|----------------------------------------------------------|---------------------|---------------------|---------------------|
| Skindex-16 at Week 4: Symptoms                           | (13) -8.29 (25.06)  | (11) -9.09 (36.94)  | (13) -7.69 (29.56)  |
| Skindex-16 at Week 8: Symptoms                           | (12) -8.09 (23.60)  | (11) -8.71 (36.19)  | (12) -4.02 (33.30)  |
| Skindex-16 at Week 1: Emotions                           | (14) -44.73 (16.35) | (13) -21.52 (27.80) | (13) -21.29 (18.20) |
| Skindex-16 at Week 4: Emotions                           | (13) -32.60 (24.96) | (11) -31.96 (36.34) | (13) -25.69 (26.54) |
| Skindex-16 at Week 8: Emotions                           | (12) -35.37 (30.88) | (11) -37.23 (28.13) | (12) -36.86 (26.32) |
| Skindex-16 at Week 1: Functioning                        | (14) -13.33 (16.69) | (13) -12.05 (29.08) | (13) -1.28 (13.51)  |
| Skindex-16 at Week 4: Functioning                        | (13) 2.05 (26.51)   | (11) -11.51 (36.07) | (13) -1.80 (20.40)  |
| Skindex-16 at Week 8: Functioning                        | (12) -0.83 (28.04)  | (11) -22.73 (25.64) | (12) -5.00 (16.17)  |
| <b>Change from Baseline, n (%)</b>                       |                     |                     |                     |
| VRS score at Week 1                                      |                     |                     |                     |
| Improved                                                 | 8 (57.1)            | 9 (64.3)            | 9 (64.3)            |
| No change                                                | 5 (35.7)            | 3 (21.4)            | 4 (28.6)            |
| Worsened                                                 | 1 (7.1)             | 2 (14.3)            | 1 (7.1)             |
| VRS score at Week 4                                      |                     |                     |                     |
| Improved                                                 | 10 (76.9)           | 8 (80.0)            | 11 (78.6)           |
| No change                                                | 3 (23.1)            | 2 (20.0)            | 2 (14.3)            |
| Worsened                                                 | 0                   | 0                   | 1 (7.1)             |
| VRS score at Week 8                                      |                     |                     |                     |
| Improved                                                 | 9 (75.0)            | 9 (81.8)            | 9 (81.8)            |
| No change                                                | 3 (25.0)            | 2 (18.2)            | 2 (18.2)            |
| Worsened                                                 | 0                   | 0                   | 0                   |
| <b>Change from Week 4, (n) Mean (SD)</b>                 |                     |                     |                     |
| Patient-recorded NRS score (last 3 recordings) at Week 5 | (13) -0.41 (1.409)  | (10) -0.47 (1.989)  | (14) -0.69 (0.991)  |
| Patient-recorded NRS score (last 3 recordings) at Week 6 | (13) -0.46 (1.561)  | (10) -0.83 (2.196)  | (13) -0.69 (0.897)  |
| Patient-recorded NRS score (last 3 recordings) at Week 7 | (12) 0.17 (1.972)   | (10) 0.00 (3.604)   | (12) -0.72 (1.127)  |
| Patient-recorded NRS score (last 3 recordings) at Week 8 | (11) -0.42 (2.071)  | (10) -0.33 (3.728)  | (12) -0.92 (1.084)  |
| <b>Number of Subjects (%)</b>                            |                     |                     |                     |
| VRS score at Week 8                                      | (12) -0.08 (1.730)  | (11) 0.36 (3.501)   | (12) 0.08 (1.165)   |
| Prescribed rescue medication                             | 6 (37.5)            | 4 (28.6)            | 2 (14.3)            |
| Used rescue medication                                   | 3 (18.8)            | 2 (14.3)            | 2 (14.3)            |

|                                                                                                                                                                                    |          |          |          |
|------------------------------------------------------------------------------------------------------------------------------------------------------------------------------------|----------|----------|----------|
| EGFRI dose reduction                                                                                                                                                               | 3 (18.8) | 2 (14.3) | 2 (14.3) |
| Withdrawal because of intense uncontrolled pruritus                                                                                                                                | 0        | 0        | 0        |
| EGFRI = epidermal growth factor receptor inhibitor; LSEQ = Leeds Sleep Evaluation Questionnaire; NRS = numerical rating scale; SD = standard deviation; VRS = verbal rating scale. |          |          |          |

Analyses of pharmacokinetic data were not conducted because of the lack of efficacy observed.

## Safety

No safety signal was detected. A total of 34 (77%) patients experienced a treatment-emergent AE, but no unexpected AEs were reported. Only 4 mild and moderate AEs were considered by investigators to be related to orvepitant (Table 4). AEs that occurred in >5% of patients were asthenia (8 [18%] patients), skin toxicity (7 [16%] patients); term reported by the investigators was skin toxicity, which for EGFRIs commonly includes reactions such as skin rash, skin dryness [xerosis], pruritus, paronychia, hair abnormality, mucositis, and increased, growth of the eyelashes or facial hair<sup>59</sup>), diarrhoea (4 [9%] patients), cough (3 [7%] patients), rash (3 [7%] patients); terms as reported by the investigators included worsening of rash; hands, ankle and face rash; and rash cutaneous), and anaemia (3 [7%] patients). These more common AEs occurred in similar rates in the active and placebo groups except for anaemia and rash, which occurred infrequently and only in patients who received orvepitant. There was no apparent relationship between incidence or severity of AEs and orvepitant dose. No serious AEs were reported.

**Table 4. Drug-related adverse events**

|                     | <b>Orvepitant 30 mg</b><br><b>N = 16</b><br><b>n (%)</b> | <b>Orvepitant 10 mg</b><br><b>N = 14</b><br><b>n (%)</b> | <b>Placebo</b><br><b>N = 14</b><br><b>n (%)</b> |
|---------------------|----------------------------------------------------------|----------------------------------------------------------|-------------------------------------------------|
| Any drug-related AE | 3 (18.8)                                                 | 1 (7.1)                                                  | 0                                               |
| <b>Mild AEs</b>     |                                                          |                                                          |                                                 |
| Asthenia            | 1 (6.3)                                                  | 0                                                        | 0                                               |
| Dizziness           | 0                                                        | 1 (7.1)                                                  | 0                                               |
| Dry mouth           | 1 (6.3)                                                  | 0                                                        | 0                                               |
| <b>Moderate AEs</b> |                                                          |                                                          |                                                 |
| Hyperhidrosis       | 1 (6.3)                                                  | 0                                                        | 0                                               |

No clinically significant changes in laboratory results, vital signs, physical examination findings, ECOG status, or ECG parameters were related to orvepitant.

## DISCUSSION

### Interpretation of the results

Orvepitant appeared safe and well tolerated, and the findings in this study are consistent with the substantial safety database accumulated to date on this product in different populations. The safety profile exhibited allows further investigation of orvepitant in this or other indications, including a planned Phase 3 study in refractory or unexplained chronic cough following a successful Phase 2 study in this indication.<sup>60</sup>

The efficacy results were, however, inconclusive; no significant difference between the active groups and the placebo group was observed. Patients experienced a mean reduction in itching of approximately 3 NRS points in the 2 orvepitant groups and the placebo group. This outcome may, of course, have resulted from the premature



1  
2  
3 termination of the study and the consequent substantially reduced sample size making it difficult to determine a  
4 treatment difference. However, given there was no indication of difference between the arms, it seems unlikely even  
5 if the study had been fully recruited that a treatment effect would have been detected. This outcome stands in stark  
6 contrast to the observation studies conducted with the NK1 antagonist aprepitant.<sup>33-49</sup> For example, in a 1-week,  
7 open-label study in 45 patients experiencing mainly EGFR-induced severe pruritus, aprepitant therapy resulted in  
8 median visual analogue scale itch scores falling from 8 at Baseline to 1 after 7 days in a refractory group resistant to  
9 standard anti-pruritus treatments and from 8 to 0 in a naive group ( $p < 0.0001$  in both groups).<sup>8</sup> In this trial 41 (91%)  
10 patients responded to aprepitant (i.e., had a  $>50\%$  reduction in pruritus intensity), and pruritus recurred in only 6  
11 (13%) patients. This difference is difficult to rationalise given that the pharmacology of orvepitant and aprepitant are  
12 so comparable and both can achieve exposures likely to be therapeutic in humans following oral dosing. However,  
13 one plausible explanation for the results in the RELIEVE 1 study is the placebo effect that is often seen in clinical  
14 trials with subjective endpoints such as pruritus intensity.<sup>61</sup> In this study, critically ill patients were receiving a  
15 modern antineoplastic therapy, and they may have had a particularly high expectation of the benefit of their EGFR  
16 therapy in general and of orvepitant's ability to reduce pruritus and thereby improve their quality of life.  
17  
18

19 A further explanation for the RELIEVE 1 study results relates to the pathological mechanism underlying the itch in  
20 these patients. EGFR-induced pruritus arises acutely within the first 2 weeks after initiation of the anticancer  
21 therapy<sup>5</sup> and cutaneous accumulation, and activation of dermal mast cells<sup>16,17,62</sup> may be the most important driver of  
22 the itch signalling in these patients. This acute course contrasts with that of chronic pruritus conditions (defined as  
23 being  $>6$  weeks in duration),<sup>63</sup> which are now linked to the sensitisation of itch signalling pathways similar to  
24 chronic pain, such that patients may report spontaneous itch (alloknesis) or an enhanced itch to normal itch-evoking  
25 stimuli (hyperknesis).<sup>32,64,65</sup> NK1 antagonists have shown great promise in randomised, placebo-controlled clinical  
26 studies as treatments for chronic pruritus conditions in general<sup>66,67</sup> as well as specifically for prurigo nodularis,<sup>68</sup>  
27 atopic dermatitis-associated pruritus,<sup>69</sup> and psoriasis-associated pruritus.<sup>70</sup> Orvepitant has shown efficacy against  
28 chronic refractory cough, which has also been recognised as a neural hypersensitivity syndrome.<sup>60</sup> Thus, NK1  
29 antagonists may lack efficacy in acute pruritic conditions driven by cutaneous mast cells, such as EGFR-induced  
30 pruritus, whilst being effective in chronic pruritus conditions by addressing itch pathway sensitisation.  
31  
32

33 A final explanation is that the improvement in itch scores seen in the 2 orvepitant groups and the placebo group may  
34 be attributable to the natural course of pruritus over the weeks following the initiation of EGFR treatment. It is now  
35 known that patterns of cutaneous toxicities with EGFR treatment can vary with time; for example, the intensity of  
36 acneiform rash that is associated with pruritus rises and falls dramatically in the first month.<sup>71</sup> If this were the case  
37 for itch intensity, it would be difficult to show a benefit against such a dynamic and self-limiting background.  
38  
39

#### 40 **Strengths and limitations of the study**

41 The RELIEVE 1 study was the first randomised, double-blind, placebo-controlled study of an NK1 receptor  
42 antagonist for EGFR-induced pruritus. The enrolment target was not reached because of recruitment problems in  
43 the critically ill target population. A similar response was seen in both placebo and active groups, a result for which  
44 there are several possible explanations. Nonetheless, this randomised, controlled study provided insights into the  
45 course, itch characteristics, and possible mechanisms of EGFR-induced pruritus that may inform future studies.  
46  
47

#### 48 **Implications for future studies**

49 Recruitment for this study was stopped after 20 months when only 44 of the planned 90 subjects had been enrolled.  
50 Despite evidence in the literature of a high prevalence of EGFR-induced pruritus,<sup>1-11,13,50,72,73</sup> we experienced  
51 substantial difficulty identifying patients with severe enough pruritus (i.e., NRS score  $\geq 5$ ) to enable detection of  
52 post-treatment change. Study enrolment may have been limited by the fact that all investigators were oncologists,  
53 who are faced with multiple AEs in patients receiving EGFRs (e.g., diarrhoea, rash, asthenia, nausea and vomiting,  
54 conjunctivitis, mucositis) that may have taken precedence over pruritus, a purely subjective symptom that is not  
55  
56  
57

1  
2  
3 widely reported in the oncology community.<sup>10</sup> Patients may also have been unwilling to enter the study because  
4 pruritus is not a major priority for them compared to their cancer.  
5

6 NK1 antagonists may still hold potential for treatment of skin toxicities experienced by cancer patients treated with  
7 EGFRIs or other targeted therapies. However, future studies will require a more complete understanding of the  
8 epidemiology and course of target cancer therapy-induced pruritus to enable appropriate selection and sizing of the  
9 patient population to achieve statistical power and a design that minimises or quantifies the placebo effect.  
10 Furthermore, greater knowledge of the pathological mechanism underlying the pruritus in this condition is needed.  
11 Without these advances, the experience of this trial shows that further investigation of this particular drug-induced  
12 pruritus condition at the current juncture will prove challenging.  
13

## 14 **FIGURE LEGENDS**

### 15 **Figure 1. Disposition of RELIEVE 1 patients**

16  
17  
18 **Acknowledgements** We thank Anne McDonough, a professional medical writer who provided medical writing  
19 support funded by NeRRe Therapeutics Ltd.  
20

21  
22 **Contributors** Study concept and design: BV, MT, PH, ML, ER, GT, AW, SS; data acquisition: BV, PG; quality  
23 control of data and algorithms: PH, DJ; data analysis and interpretation: BV, MT, AD, SS; statistical analysis: DJ;  
24 manuscript preparation: MT; manuscript editing: BV, MT, SS. All authors read, edited, and approved the final  
25 manuscript.  
26

27 **Funding** This work was supported and sponsored by NeRRe Therapeutics Ltd. The sponsor was involved in the  
28 study design; in the collection, analysis and interpretation of the data; in the writing of the report; and in the decision  
29 to submit the paper for publication. ML is funded in part through NIH/NCI Cancer Center Support Grant P30  
30 CA008748.  
31

32 **Competing interests** MT is a current employee and ER is a past employee of NeRRe Therapeutics Ltd, and both  
33 are inventors on a granted patent on novel uses of orvepitant. BV and PG received payment from NeRRe as  
34 investigators in this study. AD received payment from NeRRe for service as the Chief Medical Officer for this  
35 study. DJ is an employee of Cromsource, which received payment from NeRRe for statistical analysis of this study.  
36 PH has received payment from NeRRe as a consultant. ML reports receiving personal fees from Legacy Healthcare  
37 Services, AdgeroBio Pharmaceuticals, Amryt Pharma, Celldex Therapeutics, Debiopharm, Galderma Research and  
38 Development, Johnson & Johnson, Novocure, Lindi Skin, Merck Sharp and Dohme Corporation, Helsinn Healthcare  
39 SA, Janssen Research & Development LLC, Menlo Therapeutics, Novartis Pharmaceuticals Corporation, F.  
40 Hoffmann-La Roche AG, Abbvie Inc. Boehringer Ingelheim Pharma Gmbh & Co. KG, Allergan Inc, Amgen Inc,  
41 E.R. Squibb & Sons L.L.C., EMD Serono Inc, AstraZeneca Pharmaceuticals LP, Genentech Inc, Leo Pharma Inc,  
42 Seattle Genetics, Bayer, Männer SAS, Lutris Pharma, Pierre Fabre, Paxman Cooler Ltd, Adjucare, Dignitana,  
43 Biotechspert, Teva Pharmaceuticals Mexico, Parexel, OnQuality Pharmaceuticals Ltd, Novartis, Our Brain Bank,  
44 Millenium Pharmaceuticals and research funding from Berg Health, Bristol-Myers Squibb, Lutris Pharma,  
45 Novocure, Paxman, Biotest, and Veloce BioPharma. GT reports no conflicts of interest. AW reports receiving  
46 payment from NeRRe as Chair of the Advisory Board and from Advent Life Sciences for consultancy, Canbex  
47 Therapeutics as a nonexecutive director (past position), Calcico Therapeutics as chairman (past position) and a  
48 nonexecutive director (past position), and the Wellcome Trust as a member of grant committees. SS reports  
49 receiving payment from NeRRe as a member of the advisory board and from Almirall, Astellas Pharma, Beiersdorf,  
50 Celgene Corporation, Chugai Pharma, Creabilis, Daiichi Sankyo, Galderma, Helsinn, Kiniska Pharmaceuticals,  
51 Kneipp, Maruho Co, Merz Pharma, Novartis, Pierre Fabre Laboratories, Sienna Biopharmaceuticals, and Ziarco as a  
52 member of their advisory boards and from Menlo Therapeutics as an investigator and participation as an investigator  
53 in trials sponsored by Dermascence, Trevi Therapeutics, and Vanda Pharmaceuticals.  
54  
55  
56  
57

**Patient consent** All patients provided written informed consent for participation before enrolment in the trial.

**Ethics approval** This trial was approved by NRES Committee North East - Tyne & Wear South for the UK investigational sites and Comitato etico dell'Università Campus Bio-Medico di Roma for those in Italy.

**Provenance and peer review** Not commissioned; externally peer reviewed.

**Data sharing statement** The deidentified data set for this study is available upon reasonable request from the study sponsor NeRRRe Therapeutics Ltd.

**Open access** This is an open access article distributed in accordance with the Creative Commons Attribution Non Commercial (CC BY-NC 4.0) license, which permits others to distribute, remix, adapt, build upon this work non-commercially, and license their derivative works on different terms, provided the original work is properly cited, appropriate credit is given, any changes made indicated, and the use is non-commercial. See: <http://creativecommons.org/licenses/by-nc/4.0/>.

## REFERENCES

1. Boone SL, Rademaker A, Liu D, et al. Impact and management of skin toxicity associated with anti-epidermal growth factor receptor therapy: survey results. *Oncology* 2007;72:152–9.
2. Balagula Y, Lacouture ME, Cotliar JA. Dermatologic toxicities of targeted anticancer therapies. *J Support Oncol* 2010;8:149–61.
3. Fischer A, Rosen AC, Ensslin CJ, et al. Pruritus to anticancer agents targeting the EGFR, BRAF, and CTLA-4. *Dermatol Ther* 2013;26:135–48.
4. Lacouture ME, Anadkat MJ, Bensadoun RJ, et al. Clinical practice guidelines for the prevention and treatment of EGFR inhibitor-associated dermatologic toxicities. *Support Care Cancer* 2011;19:1079–95.
5. Clabbers JM, Boers-Doets CB, et al. Xerosis and pruritus as major EGFR-associated adverse events. *Support Care Cancer* 2016;24:513–21.
6. Joshi SS, Ortiz S, Witherspoon JN, et al. Effects of epidermal growth factor receptor inhibitor-induced dermatologic toxicities on quality of life. *Cancer* 2010;16:3916–23.
7. Rosen AC, Case EC, Dusza SW, et al. Impact of dermatologic adverse events on quality of life in 283 cancer patients: a questionnaire study in a dermatology referral clinic. *Am J Clin Dermatol* 2013;14:327–33.
8. Santini, D, Vincenzi B, Guida FM, et al. Aprepitant for management of severe pruritus related to biological cancer treatments: a pilot study. *Lancet Oncol* 2012;13:1020–24.
9. Tagrisso [prescribing information]. Wilmington, DE: AstraZeneca Pharmaceuticals LP; 2015.
10. Bauer KA, Hammerman S, Rapoport B, et al. Completeness in the reporting of dermatologic adverse drug reactions associated with monoclonal antibody epidermal growth factor receptor inhibitors in phase II and III colorectal cancer clinical trials. *Clin Colorectal Cancer* 2008;7:309–14.
11. Gandhi M, Oishi K, Zubal B, et al. Unanticipated toxicities from anticancer therapies: survivors' perspectives. *Support Care Cancer* 2010;18:1461–8.
12. Cho SI, Lee J, Lim J, et al. Pruritus in patients under targeted anticancer therapy: A multidimensional analysis using the 5-D itch scale. *Acta Derm Venereol* 2019;99:435–41.
13. Chan A, Tan EH. How well does the MESTT correlate with CTCAE scale for the grading of dermatological toxicities associated with oral tyrosine kinase inhibitors? *Support Care Cancer* 2011;19:1667–74.
14. Steinhoff MS, von Mentzer B, Geppetti P, et al. Tachykinins and their receptors: contributions to physiological control and the mechanisms of disease. *Physiol Rev* 2014;94:265–301.
15. Benecke H, Lotts T, Ständer S. Investigational drugs for pruritus. *Expert Opin Investig Drugs* 2013;22:1167–79.
16. Gerber PA, Buhren BA, Cevikbas F, et al. Preliminary evidence for a role of mast cells in epidermal growth factor receptor inhibitor-induced pruritus. *J Am Acad Dermatol* 2010;63:163–5.
17. Gerber PA, Buhren BA, Homey B. More on aprepitant for erlotinib-induced pruritus. *N Engl J Med* 2011;364:486–7.
18. Harrison S, Geppetti P. Substance P. *Int J Biochem Cell Biol* 2001;33:555–76.
19. Azimi E, Reddy VB, Pereira PJS, et al. Substance P activates Mas-related G protein-coupled receptors to induce itch. *J Allergy Clin Immunol* 2017;140(2):447–53.

20. Carstens E, Akiyama T. Central mechanisms of itch. *Curr Probl Dermatol* 2016;50:11–7.
21. Carstens EE, Carstens MI, Simons CT, et al. Dorsal horn neurons expressing NK-1 receptors mediate scratching in rats. *Neuroreport* 2010;21:303–8.
22. Akiyama T, Nguyen T, Curtis E, et al. A central role for spinal dorsal horn neurons that express neurokinin-1 receptors in chronic itch. *Pain* 2015;156:1240–6.
23. Gao ZR, Chen WZ, Liu MZ, et al. Tac1-expressing neurons in the periaqueductal gray facilitate the itch-scratching cycle via descending regulation. *Neuron* 2019;101:45–59.
24. Hägermark O, Hökfelt T, Pernow B. Flare and itch induced by substance P in human skin. *J Invest Dermatol* 1978;71:233–5.
25. Heyer G, Hornstein OP, Handwerker HO. Reactions to intradermally injected substance P and topically applied mustard oil in atopic dermatitis patients. *Acta Derm Venereol* 1991;71:291–5.
26. Thomsen JS, Sonne M, Benfeldt E, et al. Experimental itch in sodium lauryl sulphate-inflamed and normal skin in humans: A randomised, double-blind, placebo-controlled study of histamine and other inducers of itch. *Br J Dermatol* 2002;146:792–800.
27. Andoh T, Nagasawa T, Satoh M, et al. Substance P induction of itch-associated response mediated by cutaneous NK1 tachykinin receptors in mice. *J Pharmacol Exp Ther* 1998;286:1140–5.
28. Trower MK, Fisher A, Upton N, et al. Neurokinin-1 receptor antagonist orvepitant is an effective inhibitor of itch-associated response in a Mongolian gerbil model of scratching behaviour. *Exp Dermatol* 2014;23:858–60.
29. Costantini VJ, Corsi M, Dünstl G, et al. The NK1 receptor antagonist aprepitant attenuates NK1 agonist-induced scratching behaviour in the gerbil after intra-dermal, topical or oral administration. *Exp Dermatol* 2015;24:312–4.
30. Ueda Y, Inoue T, Rahman MA, et al. A new chronic itch model accompanied by skin lesions in hairless mice. *Int Immunopharmacol* 2006;6:1609–15.
31. Ständer S, Luger TA. NK-1 antagonists and itch. *Handb Exp Pharmacol* 2015;226:237–55.
32. Ständer S, Yosipovitch G. Substance P and neurokinin 1 receptor are new targets for the treatment of chronic pruritus. *Br J Dermatol* 2019. doi: 10.1111/bjd.18025. [Epub ahead of print]
33. Ständer S, Siepmann D, Herrgott I, et al. Targeting the neurokinin receptor 1 with aprepitant: a novel antipruritic strategy. *PLoS One* 2010;5:e10968.
34. Duval A, Dubertret L. Aprepitant as an antipruritic agent? *N Engl J Med* 2009;361:1415–6.
35. Booken N, Heck M, Nicolay JP, et al. Oral aprepitant in the therapy of refractory pruritus in erythrodermic cutaneous T-cell lymphoma. *Br J Dermatol* 2011;164:665–7.
36. Torres T, Fernandes I, Selores M, et al. Aprepitant: evidence of its effectiveness in patients with refractory pruritus continues. *J Am Acad Dermatol* 2012;66:e14–5.
37. Ladizinski B, Bazakas A, Olsen EA. Aprepitant: a novel neurokinin-1 receptor/substance P antagonist as antipruritic therapy in cutaneous T-cell lymphoma *J Am Acad Dermatol* 2012;67:e198–9.
38. Vincenzi B, Fratto ME, Santini D, et al. Aprepitant against pruritus in patients with solid tumours. *Support Care Cancer* 2010;18:1229–30.
39. Vincenzi B, Tonini G, Santini D. Aprepitant for erlotinib-induced pruritus. *N Engl J Med* 2010; 363:397–8.
40. Levêque D. Aprepitant for erlotinib-induced pruritus. *N Engl J Med* 2010;363:1680–1.
41. Mir O, Blanchet B, Goldwasser F. More on aprepitant for erlotinib-induced pruritus. *N Engl J Med* 2011;364:487.
42. Vincenzi B, Tonini G, Santini D. Aprepitant for erlotinib-induced pruritus. *N Engl J Med* 2010;364:397–8.
43. Ally MS, Gamba CS, Peng DH, et al. The use of aprepitant in brachioradial pruritus. *JAMA Dermatol* 2013;49:627–8.
44. Huh JW, Jeong YI, Choi KH, et al. Treatment for refractory pruritus using oral aprepitant. *Ann Dermatol* 2016;28:124–5.
45. Jiménez Gallo D, Albarrán Planelles C, Linares Barrios M, et al. Treatment of pruritus in early-stage hypopigmented mycosis fungoides with aprepitant. *Dermatol Ther* 2014;27:178–82.
46. Borja-Consigliere HA, López-Pestaña A, Vidal-Manceño MJ, et al. Aprepitant in the treatment of refractory pruritus secondary to cutaneous T-cell lymphoma. *Actas Dermosifiliogr* 2014;105:716–8.
47. Song JS, Tawa M, Chau NG, et al. Aprepitant for refractory cutaneous T-cell lymphoma-associated pruritus: 4 cases and a review of the literature. *BMC Cancer* 2017;17:200. doi: 10.1186/s12885-017-3194–8.
48. Qin H, Wang F, Wang K, et al. Aprepitant for gefitinib-induced refractory pruritus in Chinese malignancy population. *Ann Transl Med* 2019;7:54.
49. Seki N, Ochiai R, Haruyama T, et al. Need for flexible adjustment of the treatment schedule for aprepitant administration against erlotinib-induced refractory pruritus and skin rash. *Case Rep Oncol* 2019;12:84–90.

- 1  
2  
3  
4  
5  
6  
7  
8  
9  
10  
11  
12  
13  
14  
15  
16  
17  
18  
19  
20  
21  
22  
23  
24  
25  
26  
27  
28  
29  
30  
31  
32  
33  
34  
35  
36  
37  
38  
39  
40  
41  
42  
43  
44  
45  
46  
47  
48  
49  
50  
51  
52  
53  
54  
55  
56  
57  
58  
59  
60
50. Santoni M, Conti A, Andrikou K, et al. Risk of pruritus in cancer patients treated with biological therapies: a systematic review and meta-analysis of clinical trials. *Crit Rev Oncol Hematol* 2015;96:206–19.
  51. Di Fabio R, Alvaro G, Braggio S, et al. Identification, biological characterization and pharmacophoric analysis of a new potent and selective NK1 receptor antagonist clinical candidate. *Bioorg Med Chem* 2013;21:6264–73.
  52. Lindström E, von Mentzer B, Pählman I, et al. Neurokinin 1 receptor antagonists: correlation between in vitro receptor interaction and in vivo efficacy. *J Pharmacol Exp Ther* 2007;322:1286–93.
  53. Duffy RA, Varty GB, Morgan CA, et al. Correlation of neurokinin (NK) 1 receptor occupancy in gerbil striatum with behavioral effects of NK1 antagonists. *J Pharmacol Exp Ther* 2002;301:536–42.
  54. Kramer MS, Cutler N, Feighner J, et al. Distinct mechanism for antidepressant activity by blockade of central substance P receptors. *Science* 1998;281:1640–5.
  55. Ratti E, Bettica P, Alexander R, et al. Full central neurokinin-1 receptor blockade is required for efficacy in depression: evidence from orvepitant clinical studies. *J Psychopharmacol* 2013;27(5):424–34.
  56. Bergström M, Hargreaves RJ, Burns HD, et al. Human positron emission tomography studies of brain neurokinin 1 receptor occupancy by aprepitant. *Biol Psychiatry* 2004;55:1007–12.
  57. Phan NQ, Blome C, Frit F, et al. Assessment of pruritus intensity: prospective study on validity and reliability of the visual analogue scale, numerical rating scale and verbal rating scale in 471 patients with chronic pruritus. *Acta Derm Venereol* 2012;92:502–7.
  58. Chren, MM. The Skindex instruments to measure the effects of skin disease on quality of life. *Dermatol Clin* 2012;30:231–6.
  59. Pinto C, Barone CA, Girolomoni G, et al. Management of skin toxicity associated with cetuximab treatment in combination with chemotherapy or radiotherapy. *Oncologist* 2011;16:228–38.
  60. Smith J, Allman D, Badri H, et al. The neurokinin-1 receptor antagonist orvepitant is a novel antitussive therapy for chronic refractory cough: Results from a phase 2 pilot study (VOLCANO-1). *Chest* 2019 Aug 14. pii: S0012-3692(19)31451–5.
  61. Van Laarhoven AI, van der Sman-Mauriks IM, Donders AR, et al. Placebo effects on itch: a meta-analysis of clinical trials of patients with dermatological conditions. *J Invest Dermatol* 2015;135:1234–43.
  62. Mascia F, Lam G, Keith C, et al. Genetic ablation of epidermal EGFR reveals the dynamic origin of adverse effects of anti-EGFR therapy. *Sci Transl Med* 2013;5:199ra110.
  63. Ständer S, Weisshaar E, Mettang et al. Clinical classification of itch: a position paper of the International Forum for the Study of Itch. *Acta Derm Venereol* 2007;87:2917–4.
  64. Andersen HH, Akiyama T, Nattkemper LA, et al. Allodynia and hyperknesis-mechanisms, assessment methodology, and clinical implications of itch sensitization. *Pain* 2018;159:1185–1197.
  65. Ikoma A, Fartasch M, Heyer G, et al. Painful stimuli evoke itch in patients with chronic pruritus: central sensitization for itch. *Neurology* 2004;62:212–7.
  66. Ständer S, Spellman MC, Kwon P, et al. The NK1 receptor antagonist serlopitant for treatment of chronic pruritus. *Expert Opin Investig Drugs* 2019;28:659–66.
  67. Yosipovitch G, Ständer S, Kerby MB, et al. Serlopitant for the treatment of chronic pruritus: Results of a randomized, multicenter, placebo-controlled phase 2 clinical trial. *J Am Acad Dermatol* 2018;78:882–891.
  68. Ständer S, Kwon P, Hirman J, et al; Serlopitant reduced pruritus in patients with prurigo nodularis in a phase 2, randomized, placebo-controlled trial. *J Am Acad Dermatol* 2019;80:1395–402
  69. Vanda Pharmaceuticals Inc. Vanda s tradipitant improves itch and disease severity in patients with atopic dermatitis. Web site. <https://vandapharmaceuticalsinc.gcs-web.com/node/8091/pdf>. Updated September 13, 2017. Accessed August 28, 2019.
  70. U.S. National Library of Medicine. ClinicalTrials.gov. Study of the efficacy, safety and tolerability of serlopitant for the treatment of pruritus (itch) with plaque psoriasis. <https://clinicaltrials.gov/ct2/show/results/NCT03343639?term=MTI-109&rank=1>. Updated June 27, 2019. Accessed August 28, 2019.
  71. Beech J, Germetaki T, Judge M, et al. Management and grading of EGFR inhibitor-induced cutaneous toxicity. *Future Oncol* 2018;14:2531–41.
  72. Ensslin CJ, Rosen AC, Wu S, et al. Pruritus in patients treated with targeted cancer therapies: systematic review and meta-analysis. *J Am Acad Dermatol* 2013;69:708–20.
  73. Lacouture ME, Schadendorf D, Chu CY, et al. Dermatologic adverse events associated with afatinib: an oral ErbB family blocker. *Expert Rev Anticancer Ther* 2013;13:721–8.

1  
2  
3  
4  
5  
6  
7  
8  
9  
10  
11  
12  
13  
14  
15  
16  
17  
18  
19  
20  
21  
22  
23  
24  
25  
26  
27  
28  
29  
30  
31  
32  
33  
34  
35  
36  
37  
38  
39  
40  
41  
42  
43  
44  
45  
46  
47  
48  
49  
50  
51  
52  
53  
54  
55  
56  
57  
58  
59  
60





## CONSORT 2010 checklist of information to include when reporting a randomised trial\*

| Section/Topic                    | Item No | Checklist item                                                                                                                                                                              | Reported on page No |
|----------------------------------|---------|---------------------------------------------------------------------------------------------------------------------------------------------------------------------------------------------|---------------------|
| <b>Title and abstract</b>        |         |                                                                                                                                                                                             |                     |
|                                  | 1a      | Identification as a randomised trial in the title                                                                                                                                           | 1                   |
|                                  | 1b      | Structured summary of trial design, methods, results, and conclusions (for specific guidance see CONSORT for abstracts)                                                                     | 2                   |
| <b>Introduction</b>              |         |                                                                                                                                                                                             |                     |
| Background and objectives        | 2a      | Scientific background and explanation of rationale                                                                                                                                          | 3, 4                |
|                                  | 2b      | Specific objectives or hypotheses                                                                                                                                                           | 4                   |
| <b>Methods</b>                   |         |                                                                                                                                                                                             |                     |
| Trial design                     | 3a      | Description of trial design (such as parallel, factorial) including allocation ratio                                                                                                        | 4                   |
|                                  | 3b      | Important changes to methods after trial commencement (such as eligibility criteria), with reasons                                                                                          | 4                   |
| Participants                     | 4a      | Eligibility criteria for participants                                                                                                                                                       | 4                   |
|                                  | 4b      | Settings and locations where the data were collected                                                                                                                                        | 4                   |
| Interventions                    | 5       | The interventions for each group with sufficient details to allow replication, including how and when they were actually administered                                                       | 4                   |
| Outcomes                         | 6a      | Completely defined pre-specified primary and secondary outcome measures, including how and when they were assessed                                                                          | 4, 5                |
|                                  | 6b      | Any changes to trial outcomes after the trial commenced, with reasons                                                                                                                       | Not applicable      |
| Sample size                      | 7a      | How sample size was determined                                                                                                                                                              | 4                   |
|                                  | 7b      | When applicable, explanation of any interim analyses and stopping guidelines                                                                                                                | Not applicable      |
| <b>Randomisation:</b>            |         |                                                                                                                                                                                             |                     |
| Sequence generation              | 8a      | Method used to generate the random allocation sequence                                                                                                                                      | 4                   |
|                                  | 8b      | Type of randomisation; details of any restriction (such as blocking and block size)                                                                                                         | 4                   |
| Allocation concealment mechanism | 9       | Mechanism used to implement the random allocation sequence (such as sequentially numbered containers), describing any steps taken to conceal the sequence until interventions were assigned | 4                   |
| Implementation                   | 10      | Who generated the random allocation sequence, who enrolled participants, and who assigned participants to interventions                                                                     | 4                   |

|    |                                                      |     |                                                                                                                                                   |                |
|----|------------------------------------------------------|-----|---------------------------------------------------------------------------------------------------------------------------------------------------|----------------|
| 1  | Blinding                                             | 11a | If done, who was blinded after assignment to interventions (for example, participants, care providers, those assessing outcomes) and how          | 4              |
| 2  |                                                      |     |                                                                                                                                                   |                |
| 3  |                                                      | 11b | If relevant, description of the similarity of interventions                                                                                       | 4              |
| 4  | Statistical methods                                  | 12a | Statistical methods used to compare groups for primary and secondary outcomes                                                                     | 5              |
| 5  |                                                      | 12b | Methods for additional analyses, such as subgroup analyses and adjusted analyses                                                                  | Not applicable |
| 6  |                                                      |     |                                                                                                                                                   |                |
| 7  | <b>Results</b>                                       |     |                                                                                                                                                   |                |
| 8  | Participant flow (a diagram is strongly recommended) | 13a | For each group, the numbers of participants who were randomly assigned, received intended treatment, and were analysed for the primary outcome    | 5, 6           |
| 9  |                                                      | 13b | For each group, losses and exclusions after randomisation, together with reasons                                                                  | Figure 1       |
| 10 | Recruitment                                          | 14a | Dates defining the periods of recruitment and follow-up                                                                                           | 4              |
| 11 |                                                      | 14b | Why the trial ended or was stopped                                                                                                                | 8,9            |
| 12 | Baseline data                                        | 15  | A table showing baseline demographic and clinical characteristics for each group                                                                  | 5, 6           |
| 13 | Numbers analysed                                     | 16  | For each group, number of participants (denominator) included in each analysis and whether the analysis was by original assigned groups           | 7              |
| 14 |                                                      |     |                                                                                                                                                   |                |
| 15 | Outcomes and estimation                              | 17a | For each primary and secondary outcome, results for each group, and the estimated effect size and its precision (such as 95% confidence interval) | 7, 8 and 9     |
| 16 |                                                      | 17b | For binary outcomes, presentation of both absolute and relative effect sizes is recommended                                                       | Not applicable |
| 17 | Ancillary analyses                                   | 18  | Results of any other analyses performed, including subgroup analyses and adjusted analyses, distinguishing pre-specified from exploratory         | Not applicable |
| 18 |                                                      |     |                                                                                                                                                   |                |
| 19 | Harms                                                | 19  | All important harms or unintended effects in each group (for specific guidance see CONSORT for harms)                                             | 8              |
| 20 |                                                      |     |                                                                                                                                                   |                |
| 21 | <b>Discussion</b>                                    |     |                                                                                                                                                   |                |
| 22 | Limitations                                          | 20  | Trial limitations, addressing sources of potential bias, imprecision, and, if relevant, multiplicity of analyses                                  | 8              |
| 23 | Generalisability                                     | 21  | Generalisability (external validity, applicability) of the trial findings                                                                         | 8, 9           |
| 24 | Interpretation                                       | 22  | Interpretation consistent with results, balancing benefits and harms, and considering other relevant evidence                                     | 8, 9           |
| 25 |                                                      |     |                                                                                                                                                   |                |
| 26 | <b>Other information</b>                             |     |                                                                                                                                                   |                |
| 27 | Registration                                         | 23  | Registration number and name of trial registry                                                                                                    | 2              |
| 28 | Protocol                                             | 24  | Where the full trial protocol can be accessed, if available                                                                                       | Not applicable |
| 29 | Funding                                              | 25  | Sources of funding and other support (such as supply of drugs), role of funders                                                                   | 10             |

\*We strongly recommend reading this statement in conjunction with the CONSORT 2010 Explanation and Elaboration for important clarifications on all the items. If relevant, we also recommend reading CONSORT extensions for cluster randomised trials, non-inferiority and equivalence trials, non-pharmacological treatments, herbal interventions, and pragmatic trials. Additional extensions are forthcoming: for those and for up to date references relevant to this checklist, see [www.consort-statement.org](http://www.consort-statement.org).
